# Supplementary material
Source: MDPI journal article supplement (https://www.mdpi.com/2076-3417/10/24/9064)

# Modelling of the acetification stage in the production of wine vinegar by use of two serial bioreactors

Carmen M. Álvarez-Cáliz <sup>1</sup>, Inés María Santos-Dueñas <sup>1,\*</sup>, Jorge E. Jiménez-Hornero <sup>2</sup> and Isidoro García-García <sup>1</sup>

<sup>1</sup> Department of Chemical Engineering, University of Cordoba, Campus de Rabanales, 14071 Cordoba, Spain; q42alcac@yahoo.es (C.M.A.), ines.santos@uco.es (I.M.S.), isidoro.garcia@uco.es (I.G.)

<sup>2</sup> Department of Electrical Engineering and Automatic Control, University of Cordoba, Campus de Rabanales, 14071 Cordoba, Spain; jjimenez@uco.es (J.J.)

\* Correspondence: ines.santos@uco.es; Tel.: +34 957 218 658

The primary aim of this work was to model the two serially arranged bioreactors process for wine vinegar production. This required careful development of an experimental design involving the experiments of Section 3.1 (specifically, those in Tables 2–4). The results provided by the 18 randomly conducted experiments encompassed by the fractional factorial design with central points are described below.

**Table S2.1.** Operating conditions used in each experiment of the proposed design.

| Exp. no. | $V_{u1}$ | $E_{u1}$ | $E_{l1}$ | $T_1$ | $E_{l2}$ | $T_2$ |
|----------|----------|----------|----------|-------|----------|-------|
| 1        | 4.25     | 2.0      | 4.0      | 28    | 2.5      | 28    |
| 2        | 5.75     | 2.0      | 4.0      | 32    | 2.5      | 32    |
| 3        | 4.25     | 4.0      | 4.0      | 32    | 2.5      | 32    |
| 4        | 5.75     | 4.0      | 4.0      | 28    | 2.5      | 28    |
| 5        | 4.25     | 2.0      | 6.0      | 32    | 2.5      | 28    |
| 6        | 5.75     | 2.0      | 6.0      | 28    | 2.5      | 32    |
| 7        | 4.25     | 4.0      | 6.0      | 28    | 2.5      | 32    |
| 8        | 5.75     | 4.0      | 6.0      | 32    | 2.5      | 28    |
| 9        | 4.25     | 2.0      | 4.0      | 28    | 4.5      | 32    |
| 10       | 5.75     | 2.0      | 4.0      | 32    | 4.5      | 28    |
| 11       | 4.25     | 4.0      | 4.0      | 32    | 4.5      | 28    |
| 12       | 5.75     | 4.0      | 4.0      | 28    | 4.5      | 32    |
| 13       | 4.25     | 2.0      | 6.0      | 32    | 4.5      | 32    |
| 14       | 5.75     | 2.0      | 6.0      | 28    | 4.5      | 28    |
| 15       | 4.25     | 4.0      | 6.0      | 28    | 4.5      | 28    |
| 16       | 5.75     | 4.0      | 6.0      | 32    | 4.5      | 32    |
| 17       | 5.00     | 3.0      | 5.0      | 30    | 3.5      | 30    |
| 18       | 5.00     | 3.0      | 5.0      | 30    | 3.5      | 30    |

## S2.1. Results of Experiment 1

The operating conditions used in this experiment were as follows:

- Volume unloaded from the first bioreactor: 4.25 L.
- Total ethanol concentration at the time the first bioreactor was unloaded: 2.0 % (v/v).
- Ethanol concentration during loading of the first bioreactor: 4.0 % (v/v).

- Temperature in the first bioreactor: 28 °C.
- Ethanol concentration during loading of the second bioreactor: 2.5 % (v/v).
- Temperature in the second bioreactor: 28 °C.

Figures S2.1 and S2.2 show the variation of the ethanol concentration, acidity, volume, and total and viable cells, in the first and second bioreactor, respectively. All values shown are the means of five replications with their standard deviations.

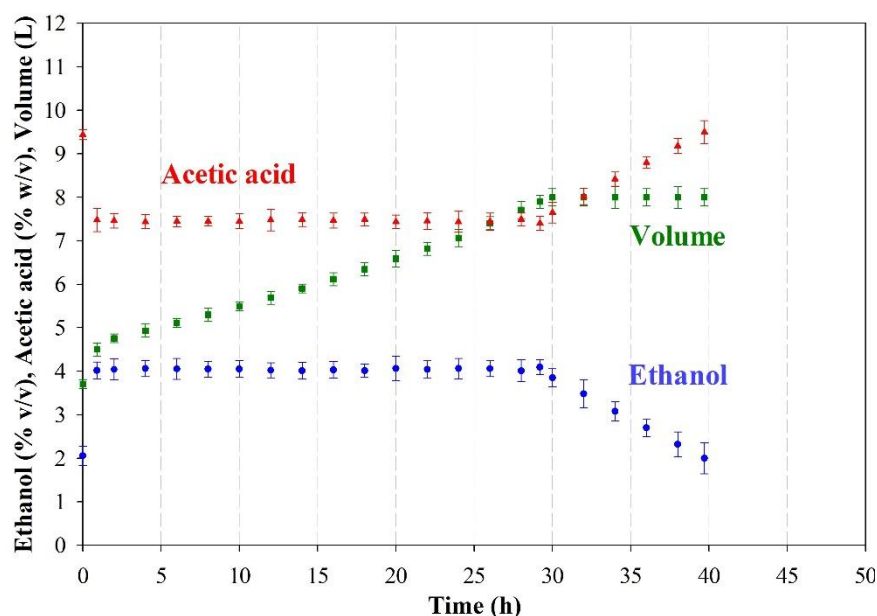

**Figure S2.1.** Time course of the ethanol concentration, acidity and volume of medium in the first bioreactor in Experiment 1.

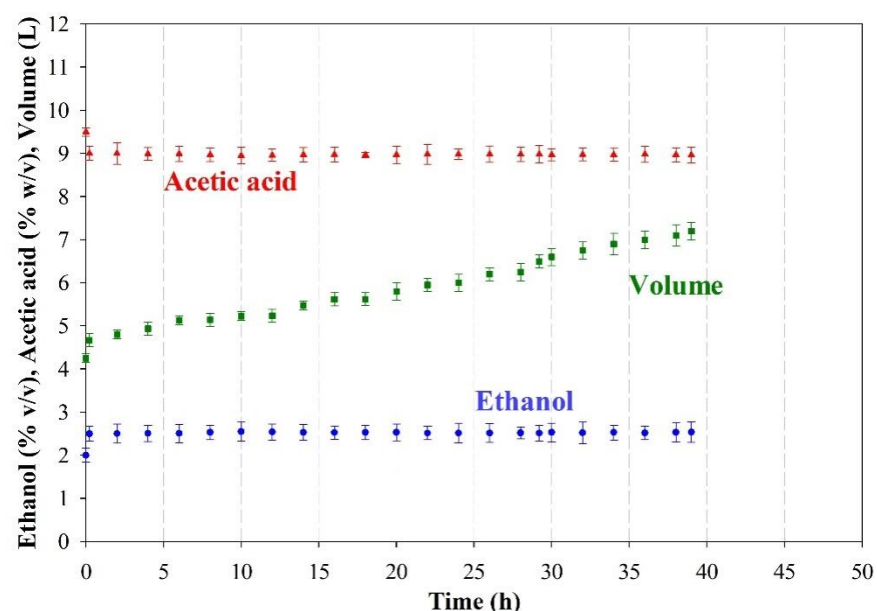

**Figure S2.2.** Time course of the ethanol concentration, acidity and volume of medium in the second bioreactor in Experiment 1.

The procedure used to obtain the different variables is described in detail in Supplementary Material 1. By way of summary, Table S2.2 shows the values for Experiment 1.

**Table S2.2.** Experimental results obtained in Experiment 1.

| Variable                                                                                 | Value             |
|------------------------------------------------------------------------------------------|-------------------|
| Total cycle duration (h)                                                                 | $39.7 \pm 0.8$    |
| Duration of the fast loading stage in the first bioreactor (h)                           | $0.9 \pm 0.1$     |
| Duration of the slow loading stage in the first bioreactor (h)                           | $28.3 \pm 0.6$    |
| Duration of the depletion stage in the first bioreactor (h)                              | $10.5 \pm 1.0$    |
| Duration of the fast loading stage in the second bioreactor (h)                          | $0.2 \pm 0.1$     |
| Duration of the slow loading stage in the second bioreactor (h)                          | $39.4 \pm 1.2$    |
| Time fraction of the fast loading stage in the first bioreactor over the cycle duration  | $0.023 \pm 0.003$ |
| Time fraction of the slow loading stage in the first bioreactor over the cycle duration  | $0.713 \pm 0.021$ |
| Time fraction of the depletion stage in the first bioreactor over the cycle duration     | $0.264 \pm 0.026$ |
| Time fraction of the fast loading stage in the second bioreactor over the cycle duration | $0.006 \pm 0.001$ |
| Time fraction of the slow loading stage in the second bioreactor over the cycle duration | $0.994 \pm 0.043$ |
| Mean volume in the fast loading stage in the first bioreactor (L)                        | $4.21 \pm 0.05$   |
| Mean volume in the slow loading stage in the first bioreactor (L)                        | $6.35 \pm 0.05$   |
| Mean volume in the depletion stage in the first bioreactor (L)                           | $8.02 \pm 0.05$   |
| Mean volume in the first bioreactor (L)                                                  | $6.74 \pm 0.25$   |
| Mean volume in the fast loading stage in the second bioreactor (L)                       | $4.38 \pm 0.05$   |
| Mean volume in the slow loading stage in the second bioreactor (L)                       | $5.86 \pm 0.05$   |
| Mean volume in the second bioreactor (L)                                                 | $5.85 \pm 0.25$   |
| Mean overall volume during a cycle in the two bioreactors as a whole (L)                 | $12.59 \pm 0.35$  |
| Volume of fermentation medium unloaded from the second reactor (L)                       | $7.2 \pm 0.05$    |
| Final ethanol concentration at the time the second bioreactor was unloaded (% v/v)       | $2.3 \pm 0.2$     |
| Mean ethanol concentration in the first bioreactor (% v/v)                               | $3.7 \pm 0.1$     |
| Mean ethanol concentration in the second bioreactor (% v/v)                              | $3.9 \pm 0.1$     |
| Final acetic acid concentration at the time the first bioreactor was unloaded (% w/v)    | $9.4 \pm 0.2$     |
| Final acetic acid concentration at the time the second bioreactor was unloaded (% w/v)   | $9.2 \pm 0.2$     |
| Mean acetic acid concentration in the first bioreactor (% w/v)                           | $7.8 \pm 0.1$     |

|                                                                                                         |                 |
|---------------------------------------------------------------------------------------------------------|-----------------|
| Mean acetic acid concentration in the second bioreactor (% w/v)                                         | $7.6 \pm 0.1$   |
| Mean rate of acetic acid formation in the first bioreactor (% w/v · h <sup>-1</sup> )                   | $0.15 \pm 0.01$ |
| Mean rate of acetic acid formation in second bioreactor (% w/v · h <sup>-1</sup> )                      | $0.11 \pm 0.01$ |
| Mean overall rate of acetic acid formation in the two bioreactors as a whole (% w/v · h <sup>-1</sup> ) | $0.13 \pm 0.01$ |
| Total acetic acid production in the first bioreactor (g acetic acid · h <sup>-1</sup> )                 | $10.1 \pm 0.3$  |
| Total acetic acid production in the second bioreactor (g acetic acid · h <sup>-1</sup> )                | $6.6 \pm 0.5$   |
| Total acetic acid production in the two bioreactors as a whole (g acetic acid · h <sup>-1</sup> )       | $16.7 \pm 0.5$  |

## S2.2. Results of Experiment 2

The operating conditions used in this experiment were as follows:

- Volume unloaded from the first bioreactor: 5.75 L.
- Total ethanol concentration at the time the first bioreactor was unloaded: 2.0 % (v/v).
- Ethanol concentration during loading of the first bioreactor: 4.0 % (v/v).
- Temperature in the first bioreactor: 32 °C.
- Ethanol concentration during loading of the second bioreactor: 2.5 % (v/v).
- Temperature in the second bioreactor: 32 °C.

Figures S2.3 and S2.4 show the variation of the ethanol concentration, acidity, volume, and total and viable cells, in the first and second bioreactor, respectively. All values shown are the means of eight replications with their standard deviations.

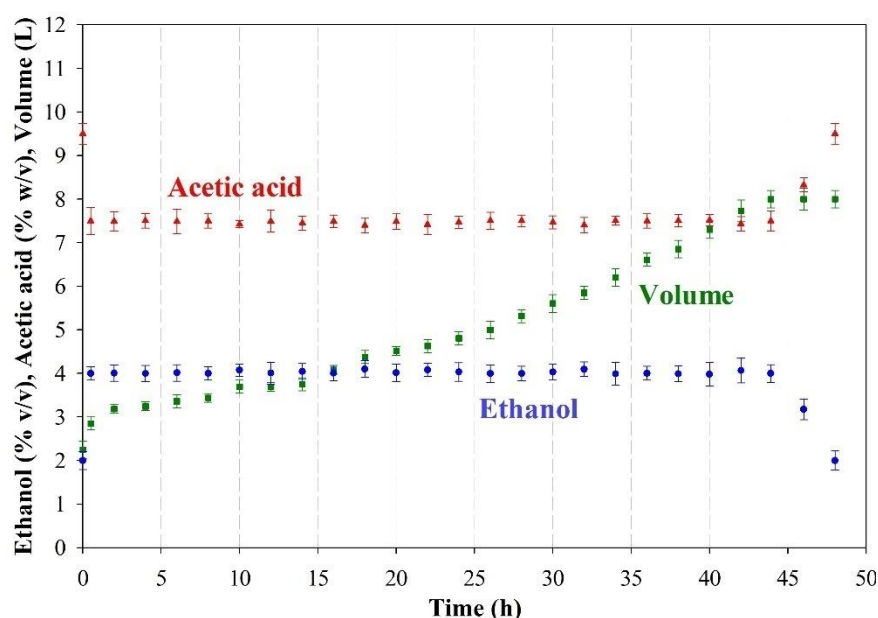

**Figure S2.3.** Time course of the ethanol concentration, acidity and volume of medium in the first bioreactor in Experiment 2.

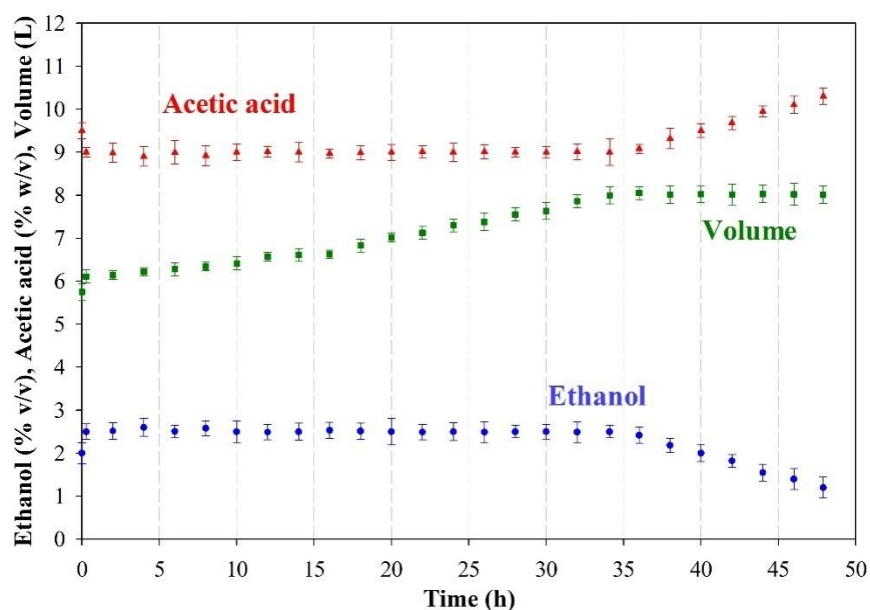

**Figure S2.4.** Time course of the ethanol concentration, acidity and volume of medium in the second bioreactor in Experiment 2.

The procedure used to obtain the different variables is described in detail in Supplementary Material 1. By way of summary, Table S2.3 shows the values for Experiment 2.

**Table S2.3.** Experimental results obtained in Experiment 2.

| Variable                                                                                 | Value         |
|------------------------------------------------------------------------------------------|---------------|
| Total cycle duration (h)                                                                 | 48.0 ± 0.9    |
| Duration of the fast loading stage in the first bioreactor (h)                           | 0.5 ± 0.1     |
| Duration of the slow loading stage in the first bioreactor (h)                           | 43.4 ± 0.8    |
| Duration of the depletion stage in the first bioreactor (h)                              | 4.1 ± 1.2     |
| Duration of the fast loading stage in the second bioreactor (h)                          | 0.3 ± 0.1     |
| Duration of the slow loading stage in the second bioreactor (h)                          | 33.8 ± 0.4    |
| Duration of the depletion stage in the second bioreactor (h)                             | 13.8 ± 0.7    |
| Time fraction of the fast loading stage in the first bioreactor over the cycle duration  | 0.010 ± 0.001 |
| Time fraction of the slow loading stage in the first bioreactor over the cycle duration  | 0.905 ± 0.024 |
| Time fraction of the depletion stage in the first bioreactor over the cycle duration     | 0.085 ± 0.025 |
| Time fraction of the fast loading stage in the second bioreactor over the cycle duration | 0.006 ± 0.001 |
| Time fraction of the slow loading stage in the second bioreactor over the cycle duration | 0.706 ± 0.016 |
| Time fraction of the depletion stage in the second bioreactor over the cycle duration    | 0.288 ± 0.016 |
| Mean volume in the fast loading stage in the first bioreactor (L)                        | 2.55 ± 0.05   |
| Mean volume in the slow loading stage in the first bioreactor (L)                        | 5.43 ± 0.05   |
| Mean volume in the depletion stage in the first bioreactor (L)                           | 8.01 ± 0.05   |
| Mean volume in the first bioreactor (L)                                                  | 5.61 ± 0.24   |
| Mean volume in the fast loading stage in the second bioreactor (L)                       | 5.93 ± 0.05   |
| Mean volume in the slow loading stage in the second bioreactor (L)                       | 7.06 ± 0.05   |
| Mean volume in the depletion stage in the second bioreactor (L)                          | 8.00 ± 0.05   |
| Mean volume in the second bioreactor (L)                                                 | 7.32 ± 0.17   |
| Mean overall volume during a cycle in the two bioreactors as a whole (L)                 | 12.94 ± 0.29  |
| Volume of fermentation medium unloaded from the second reactor (L)                       | 8.00 ± 0.05   |
| Final ethanol concentration at the time the second bioreactor was unloaded (% v/v)       | 1.2 ± 0.2     |
| Mean ethanol concentration in the first bioreactor (% v/v)                               | 3.8 ± 0.1     |
| Mean ethanol concentration in the second bioreactor (% v/v)                              | 2.3 ± 0.1     |

|                                                                                                         |                 |
|---------------------------------------------------------------------------------------------------------|-----------------|
| Final acetic acid concentration at the time the first bioreactor was unloaded (% w/v)                   | $9.5 \pm 0.2$   |
| Final acetic acid concentration at the time the second bioreactor was unloaded (% w/v)                  | $10.3 \pm 0.2$  |
| Mean acetic acid concentration in the first bioreactor (% w/v)                                          | $7.7 \pm 0.1$   |
| Mean acetic acid concentration in the second bioreactor (% w/v)                                         | $9.2 \pm 0.1$   |
| Mean rate of acetic acid formation in the first bioreactor (% w/v · h <sup>-1</sup> )                   | $0.20 \pm 0.01$ |
| Mean rate of acetic acid formation in second bioreactor (% w/v · h <sup>-1</sup> )                      | $0.08 \pm 0.01$ |
| Mean overall rate of acetic acid formation in the two bioreactors as a whole (% w/v · h <sup>-1</sup> ) | $0.13 \pm 0.01$ |
| Total acetic acid production in the first bioreactor (g acetic acid · h <sup>-1</sup> )                 | $11.4 \pm 0.3$  |
| Total acetic acid production in the second bioreactor (g acetic acid · h <sup>-1</sup> )                | $5.8 \pm 0.4$   |
| Total acetic acid production in the two bioreactors as a whole (g acetic acid · h <sup>-1</sup> )       | $17.2 \pm 0.5$  |

### S2.3. Results of Experiment 3

The operating conditions used in this experiment were as follows:

- Volume unloaded from the first bioreactor: 4.25 L.
- Total ethanol concentration at the time the first bioreactor was unloaded: 4.0 % (v/v).
- Ethanol concentration during loading of the first bioreactor: 4.0 % (v/v).
- Temperature in the first bioreactor: 32 °C.
- Ethanol concentration during loading of the second bioreactor: 2.5 % (v/v).
- Temperature in the second bioreactor: 32 °C.

Figures S2.5 and S2.6 show the variation of the ethanol concentration, acidity, volume, and total and viable cells, in the first and second bioreactor, respectively. All values shown are the means of ten replications with their standard deviations.

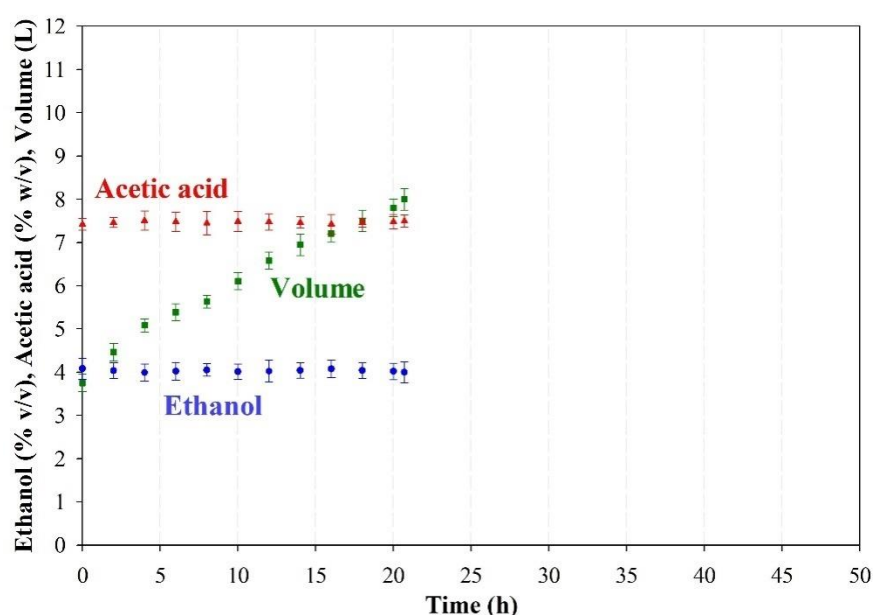

**Figure S2.5.** Time course of the ethanol concentration, acidity and volume of medium in the first bioreactor in Experiment 3.

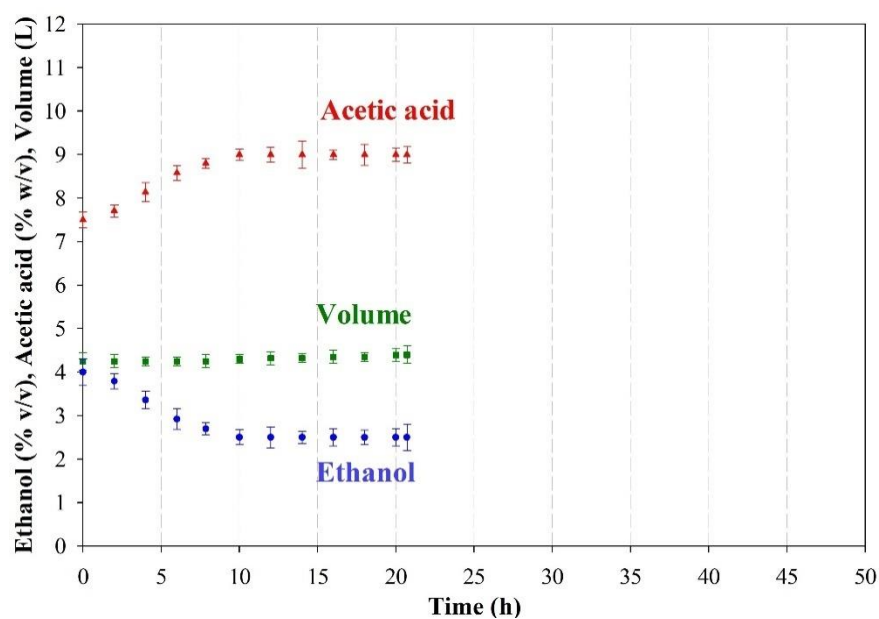

**Figure S2.6.** Time course of the ethanol concentration, acidity and volume of medium in the second bioreactor in Experiment 3.

The procedure used to obtain the different variables is described in detail in Supplementary Material 1. By way of summary, Table S2.4 shows the values for Experiment 3.



**Table S2.4.** Experimental results obtained in Experiment 3.

| Variable                                                                                                | Value             |
|---------------------------------------------------------------------------------------------------------|-------------------|
| Total cycle duration (h)                                                                                | $20.8 \pm 0.5$    |
| Duration of the slow loading stage in the first bioreactor (h)                                          | $20.8 \pm 0.5$    |
| Duration of the previous depletion stage in the second bioreactor (h)                                   | $7.9 \pm 0.2$     |
| Duration of the slow loading stage in the second bioreactor (h)                                         | $12.9 \pm 0.4$    |
| Time fraction of the slow loading stage in the first bioreactor over the cycle duration                 | $1.0 \pm 0.034$   |
| Time fraction of the previous depletion stage in the second bioreactor over the cycle duration          | $0.379 \pm 0.012$ |
| Time fraction of the slow loading stage in the second bioreactor over the cycle duration                | $0.621 \pm 0.025$ |
| Mean volume in the slow loading stage in the first bioreactor (L)                                       | $5.89 \pm 0.05$   |
| Mean volume in the first bioreactor (L)                                                                 | $5.89 \pm 0.34$   |
| Mean volume in the previous depletion stage in the second bioreactor (L)                                | $4.25 \pm 0.05$   |
| Mean volume in the slow loading stage in the second bioreactor (L)                                      | $4.40 \pm 0.05$   |
| Mean volume in the second bioreactor (L)                                                                | $4.30 \pm 0.12$   |
| Mean overall volume during a cycle in the two bioreactors as a whole (L)                                | $10.19 \pm 0.36$  |
| Volume of fermentation medium unloaded from the second reactor (L)                                      | $4.40 \pm 0.05$   |
| Final ethanol concentration at the time the second bioreactor was unloaded (% v/v)                      | $2.3 \pm 0.2$     |
| Mean ethanol concentration in the first bioreactor (% v/v)                                              | $4.0 \pm 0.1$     |
| Mean ethanol concentration in the second bioreactor (% v/v)                                             | $2.9 \pm 0.2$     |
| Final acetic acid concentration at the time the first bioreactor was unloaded (% w/v)                   | $7.5 \pm 0.2$     |
| Final acetic acid concentration at the time the second bioreactor was unloaded (% w/v)                  | $9.2 \pm 0.2$     |
| Mean acetic acid concentration in the first bioreactor (% w/v)                                          | $7.5 \pm 0.1$     |
| Mean acetic acid concentration in the second bioreactor (% w/v)                                         | $8.6 \pm 0.2$     |
| Mean rate of acetic acid formation in the first bioreactor (% w/v · h <sup>-1</sup> )                   | $0.26 \pm 0.02$   |
| Mean rate of acetic acid formation in second bioreactor (% w/v · h <sup>-1</sup> )                      | $0.10 \pm 0.01$   |
| Mean overall rate of acetic acid formation in the two bioreactors as a whole (% w/v · h <sup>-1</sup> ) | $0.19 \pm 0.01$   |
| Total acetic acid production in the first bioreactor (g acetic acid · h <sup>-1</sup> )                 | $15.3 \pm 0.6$    |
| Total acetic acid production in the second bioreactor (g acetic acid · h <sup>-1</sup> )                | $4.2 \pm 0.6$     |

---

|                                                                                                 |            |
|-------------------------------------------------------------------------------------------------|------------|
| Total acetic acid production in the two bioreactors as a whole (g acetic acid·h <sup>-1</sup> ) | 19.5 ± 0.6 |
|-------------------------------------------------------------------------------------------------|------------|

---

## S2.4. Results of Experiment 4

The operating conditions used in this experiment were as follows:

- Volume unloaded from the first bioreactor: 5.75 L.
- Total ethanol concentration at the time the first bioreactor was unloaded: 4.0 % (v/v).
- Ethanol concentration during loading of the first bioreactor: 4.0 % (v/v).
- Temperature in the first bioreactor: 28 °C.
- Ethanol concentration during loading of the second bioreactor: 2.5 % (v/v).
- Temperature in the second bioreactor: 28 °C.

Figures S2.7 and S2.8 show the variation of the ethanol concentration, acidity, volume, and total and viable cells, in the first and second bioreactor, respectively. All values shown are the means of six replications with their standard deviations.

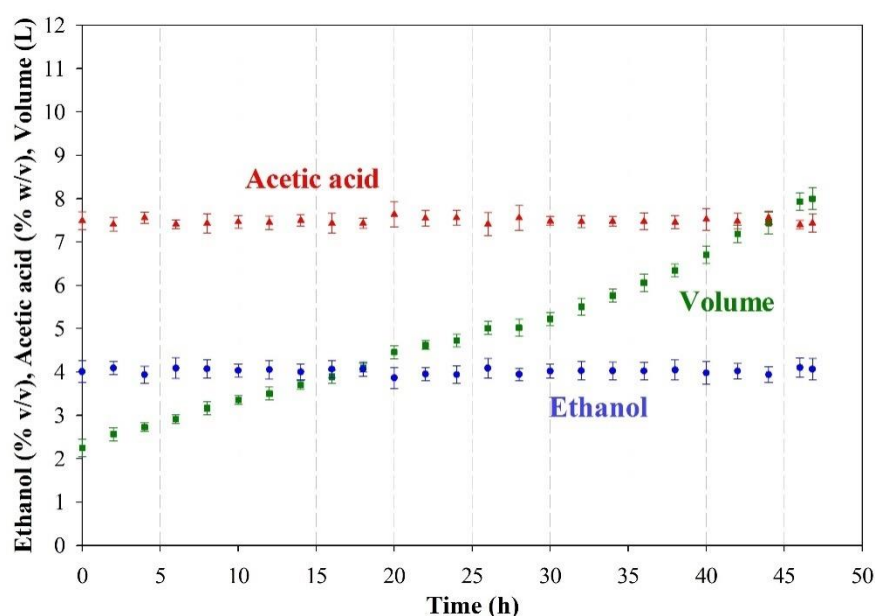

**Figure S2.7.** Time course of the ethanol concentration, acidity and volume of medium in the first bioreactor in Experiment 4.

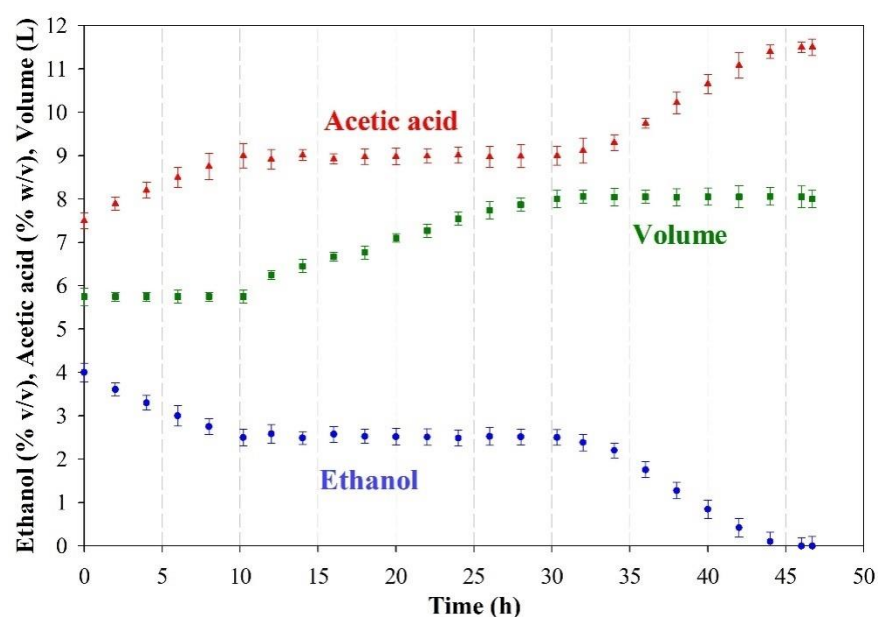

**Figure S2.8.** Time course of the ethanol concentration, acidity and volume of medium in the second bioreactor in Experiment 4.

The procedure used to obtain the different variables is described in detail in Supplementary Material 1. By way of summary, Table S2.5 shows the values for Experiment 4.

**Table S2.5.** Experimental results obtained in Experiment 4.

| Variable                                                                                       | Value         |
|------------------------------------------------------------------------------------------------|---------------|
| Total cycle duration (h)                                                                       | 46.8 ± 1.2    |
| Duration of the slow loading stage in the first bioreactor (h)                                 | 46.8 ± 1.2    |
| Duration of the previous depletion stage in the second bioreactor (h)                          | 10.2 ± 0.1    |
| Duration of the slow loading stage in the second bioreactor (h)                                | 20.1 ± 0.4    |
| Duration of the depletion stage in the second bioreactor (h)                                   | 14.8 ± 0.8    |
| Duration of the starving stage in the second bioreactor (h)                                    | 1.6 ± 1.1     |
| Time fraction of the slow loading stage in the first bioreactor over the cycle duration        | 1.000 ± 0.036 |
| Time fraction of the previous depletion stage in the second bioreactor over the cycle duration | 0.219 ± 0.004 |
| Time fraction of the slow loading stage in the second bioreactor over the cycle duration       | 0.431 ± 0.012 |
| Time fraction of the depletion stage in the second bioreactor over the cycle duration          | 0.316 ± 0.018 |
| Time fraction of the starving stage in the second bioreactor over the cycle duration           | 0.034 ± 0.023 |
| Mean volume in the slow loading stage in the first bioreactor (L)                              | 5.13 ± 0.05   |
| Mean volume in the first bioreactor (L)                                                        | 5.13 ± 0.19   |
| Mean volume in the previous depletion stage in the second bioreactor (L)                       | 5.75 ± 0.05   |
| Mean volume in the slow loading stage in the second bioreactor (L)                             | 6.88 ± 0.05   |
| Mean volume in the depletion stage in the second bioreactor (L)                                | 8.00 ± 0.05   |
| Mean volume in the starving stage in the second bioreactor (L)                                 | 8.00 ± 0.05   |
| Mean volume in the second bioreactor (L)                                                       | 7.02 ± 0.25   |
| Mean overall volume during a cycle in the two bioreactors as a whole (L)                       | 12.15 ± 0.31  |
| Volume of fermentation medium unloaded from the second reactor (L)                             | 8.00 ± 0.05   |
| Final ethanol concentration at the time the second bioreactor was unloaded (% v/v)             | 0.0 ± 0.2     |
| Mean ethanol concentration in the first bioreactor (% v/v)                                     | 4.0 ± 0.1     |
| Mean ethanol concentration in the second bioreactor (% v/v)                                    | 2.2 ± 0.2     |
| Final acetic acid concentration at the time the first bioreactor was unloaded (% w/v)          | 7.5 ± 0.2     |
| Final acetic acid concentration at the time the second bioreactor was unloaded (% w/v)         | 11.5 ± 0.2    |
| Mean acetic acid concentration in the first bioreactor (% w/v)                                 | 7.5 ± 0.1     |

|                                                                                                         |                 |
|---------------------------------------------------------------------------------------------------------|-----------------|
| Mean acetic acid concentration in the second bioreactor (% w/v)                                         | $9.3 \pm 0.2$   |
| Mean rate of acetic acid formation in the first bioreactor (% w/v · h <sup>-1</sup> )                   | $0.18 \pm 0.01$ |
| Mean rate of acetic acid formation in second bioreactor (% w/v · h <sup>-1</sup> )                      | $0.15 \pm 0.01$ |
| Mean overall rate of acetic acid formation in the two bioreactors as a whole (% w/v · h <sup>-1</sup> ) | $0.16 \pm 0.01$ |
| Total acetic acid production in the first bioreactor (g acetic acid · h <sup>-1</sup> )                 | $9.2 \pm 0.3$   |
| Total acetic acid production in the second bioreactor (g acetic acid · h <sup>-1</sup> )                | $10.5 \pm 0.5$  |
| Total acetic acid production in the two bioreactors as a whole (g acetic acid · h <sup>-1</sup> )       | $19.7 \pm 0.6$  |

## S2.5. Results of Experiment 5

The operating conditions used in this experiment were as follows:

- Volume unloaded from the first bioreactor: 4.25 L.
- Total ethanol concentration at the time the first bioreactor was unloaded: 2.0 % (v/v).
- Ethanol concentration during loading of the first bioreactor: 6.0 % (v/v).
- Temperature in the first bioreactor: 32 °C.
- Ethanol concentration during loading of the second bioreactor: 2.5 % (v/v).
- Temperature in the second bioreactor: 28 °C.

Figures S2.9 and S2.10 show the variation of the ethanol concentration, acidity, volume, and total and viable cells, in the first and second bioreactor, respectively. All values shown are the means of seven replications with their standard deviations.

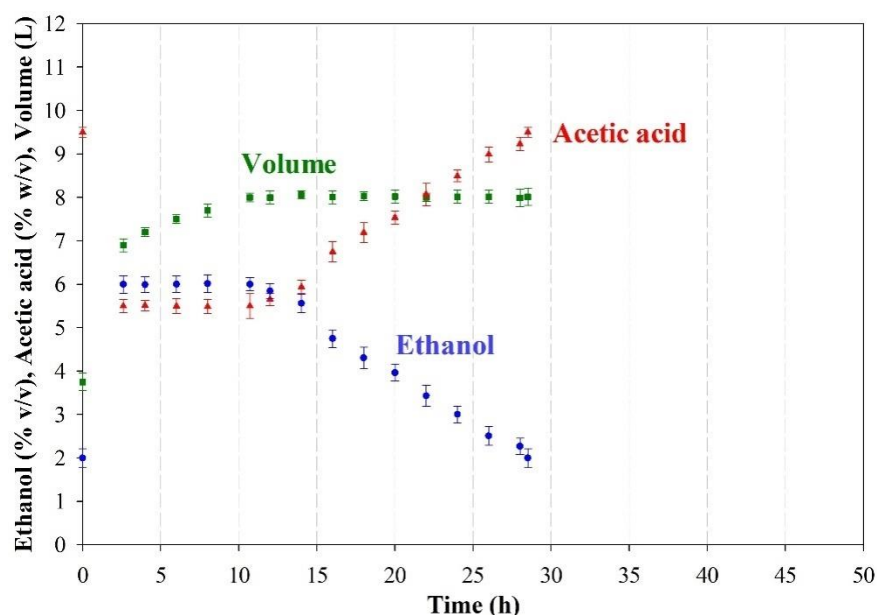

**Figure S2.9.** Time course of the ethanol concentration, acidity and volume of medium in the first bioreactor in Experiment 5.

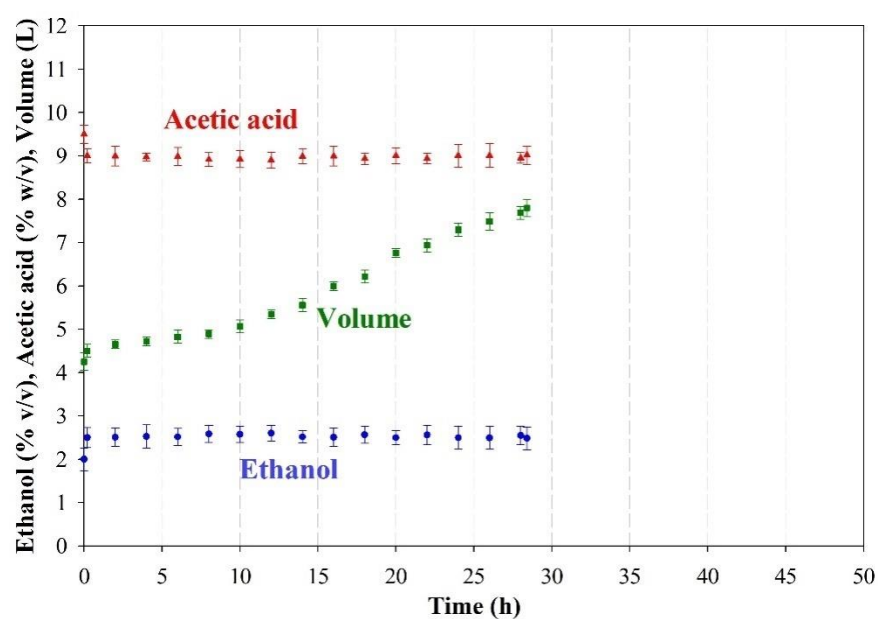

**Figure S2.10.** Time course of the ethanol concentration, acidity and volume of medium in the second bioreactor in Experiment 5.

The procedure used to obtain the different variables is described in detail in Supplementary Material 1. By way of summary, Table S2.6 shows the values for Experiment 5.

**Table S2.6.** Experimental results obtained in Experiment 5.

| Variable                                                                                 | Value             |
|------------------------------------------------------------------------------------------|-------------------|
| Total cycle duration (h)                                                                 | $28.5 \pm 0.7$    |
| Duration of the slow loading stage in the first bioreactor (h)                           | $2.6 \pm 0.1$     |
| Duration of the slow loading stage in the first bioreactor (h)                           | $8.1 \pm 0.3$     |
| Duration of the depletion stage in the first bioreactor (h)                              | $17.8 \pm 0.8$    |
| Duration of the fast loading stage in the second bioreactor (h)                          | $0.2 \pm 0.1$     |
| Duration of the slow loading stage in the second bioreactor (h)                          | $28.2 \pm 0.7$    |
| Time fraction of the fast loading stage in the first bioreactor over the cycle duration  | $0.091 \pm 0.004$ |
| Time fraction of the slow loading stage in the first bioreactor over the cycle duration  | $0.284 \pm 0.013$ |
| Time fraction of the depletion stage in the first bioreactor over the cycle duration     | $0.625 \pm 0.031$ |
| Time fraction of the fast loading stage in the second bioreactor over the cycle duration | $0.007 \pm 0.004$ |
| Time fraction of the slow loading stage in the second bioreactor over the cycle duration | $0.993 \pm 0.035$ |
| Mean volume in the fast loading stage in the first bioreactor (L)                        | $5.33 \pm 0.05$   |
| Mean volume in the slow loading stage in the first bioreactor (L)                        | $7.45 \pm 0.05$   |
| Mean volume in the depletion stage in the first bioreactor (L)                           | $8.00 \pm 0.05$   |
| Mean volume in the first bioreactor (L)                                                  | $7.6 \pm 0.27$    |
| Mean volume in the fast loading stage in the second bioreactor (L)                       | $4.38 \pm 0.05$   |
| Mean volume in the slow loading stage in the second bioreactor (L)                       | $6.15 \pm 0.10$   |
| Mean volume in the second bioreactor (L)                                                 | $6.14 \pm 0.24$   |
| Mean overall volume during a cycle in the two bioreactors as a whole (L)                 | $13.74 \pm 0.36$  |
| Volume of fermentation medium unloaded from the second reactor (L)                       | $7.8 \pm 0.05$    |
| Final ethanol concentration at the time the second bioreactor was unloaded (% v/v)       | $2.5 \pm 0.2$     |
| Mean ethanol concentration in the first bioreactor (% v/v)                               | $4.4 \pm 0.4$     |
| Mean ethanol concentration in the second bioreactor (% v/v)                              | $2.5 \pm 0.1$     |
| Final acetic acid concentration at the time the first bioreactor was unloaded (% w/v)    | $9.5 \pm 0.2$     |
| Final acetic acid concentration at the time the second bioreactor was unloaded (% w/v)   | $9.0 \pm 0.2$     |
| Mean acetic acid concentration in the first bioreactor (% w/v)                           | $7.1 \pm 0.4$     |

|                                                                                                         |                 |
|---------------------------------------------------------------------------------------------------------|-----------------|
| Mean acetic acid concentration in the second bioreactor (% w/v)                                         | $9.0 \pm 0.1$   |
| Mean rate of acetic acid formation in the first bioreactor (% w/v · h <sup>-1</sup> )                   | $0.19 \pm 0.01$ |
| Mean rate of acetic acid formation in second bioreactor (% w/v · h <sup>-1</sup> )                      | $0.17 \pm 0.01$ |
| Mean overall rate of acetic acid formation in the two bioreactors as a whole (% w/v · h <sup>-1</sup> ) | $0.18 \pm 0.01$ |
| Total acetic acid production in the first bioreactor (g acetic acid · h <sup>-1</sup> )                 | $14.2 \pm 0.5$  |
| Total acetic acid production in the second bioreactor (g acetic acid · h <sup>-1</sup> )                | $10.5 \pm 0.7$  |
| Total acetic acid production in the two bioreactors as a whole (g acetic acid · h <sup>-1</sup> )       | $24.6 \pm 0.8$  |

## S2.6. Results of Experiment 6

The operating conditions used in this experiment were as follows:

- Volume unloaded from the first bioreactor: 5.75 L.
- Total ethanol concentration at the time the first bioreactor was unloaded: 2.0 % (v/v).
- Ethanol concentration during loading of the first bioreactor: 6.0 % (v/v).
- Temperature in the first bioreactor: 28 °C.
- Ethanol concentration during loading of the second bioreactor: 2.5 % (v/v).
- Temperature in the second bioreactor: 32 °C.

Figures S2.11 and S2.12 show the variation of the ethanol concentration, acidity, volume, and total and viable cells, in the first and second bioreactor, respectively. All values shown are the means of seven replications with their standard deviations.

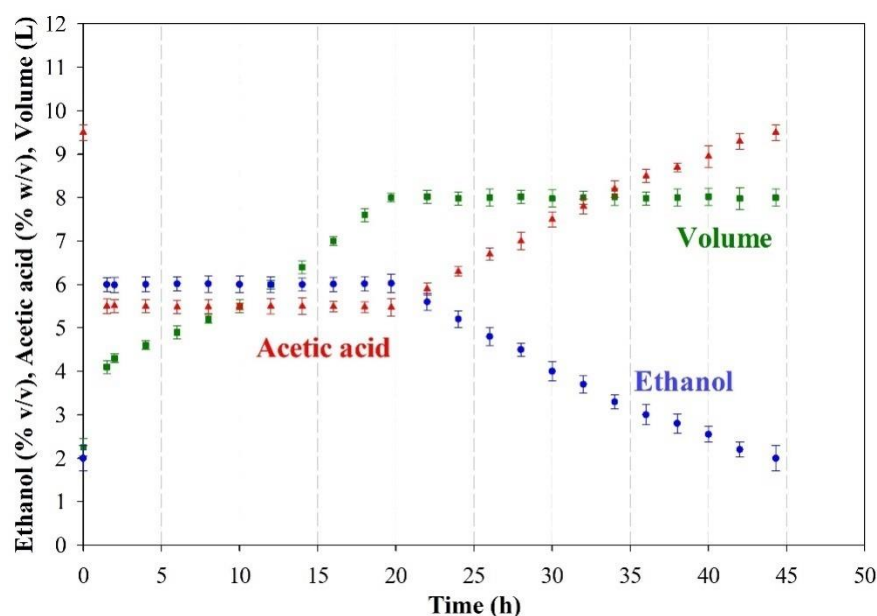

**Figure S2.11.** Time course of the ethanol concentration, acidity and volume of medium in the first bioreactor in Experiment 6.



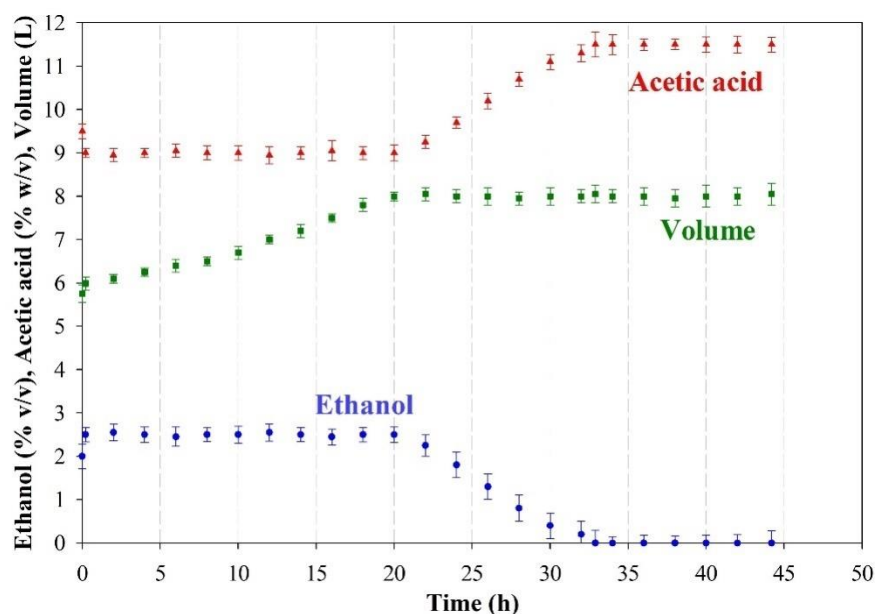

**Figure S2.12.** Time course of the ethanol concentration, acidity and volume of medium in the second bioreactor in Experiment 6.

The procedure used to obtain the different variables is described in detail in Supplementary Material 1. By way of summary, Table S2.7 shows the values for Experiment 6.

**Table S2.7.** Experimental results obtained in Experiment 6.

| Variable                                                                                 | Value             |
|------------------------------------------------------------------------------------------|-------------------|
| Total cycle duration (h)                                                                 | $44.3 \pm 0.6$    |
| Duration of the fast loading stage in the first bioreactor (h)                           | $1.5 \pm 0.1$     |
| Duration of the slow loading stage in the first bioreactor (h)                           | $18.2 \pm 0.4$    |
| Duration of the depletion stage in the first bioreactor (h)                              | $24.6 \pm 0.7$    |
| Duration of the fast loading stage in the second bioreactor (h)                          | $0.2 \pm 0.1$     |
| Duration of the slow loading stage in the second bioreactor (h)                          | $19.8 \pm 0.4$    |
| Duration of the depletion stage in the second bioreactor (h)                             | $12.9 \pm 0.7$    |
| Duration of the starving stage in the second bioreactor (h)                              | $11.3 \pm 0.8$    |
| Time fraction of the fast loading stage in the first bioreactor over the cycle duration  | $0.034 \pm 0.002$ |
| Time fraction of the slow loading stage in the first bioreactor over the cycle duration  | $0.411 \pm 0.011$ |
| Time fraction of the depletion stage in the first bioreactor over the cycle duration     | $0.555 \pm 0.018$ |
| Time fraction of the fast loading stage in the second bioreactor over the cycle duration | $0.005 \pm 0.002$ |
| Time fraction of the slow loading stage in the second bioreactor over the cycle duration | $0.448 \pm 0.011$ |
| Time fraction of the depletion stage in the second bioreactor over the cycle duration    | $0.292 \pm 0.017$ |

|                                                                                                         |                   |
|---------------------------------------------------------------------------------------------------------|-------------------|
| Time fraction of the starving stage in the second bioreactor over the cycle duration                    | $0.256 \pm 0.020$ |
| Mean volume in the fast loading stage in the first bioreactor (L)                                       | $3.18 \pm 0.05$   |
| Mean volume in the slow loading stage in the first bioreactor (L)                                       | $6.05 \pm 0.05$   |
| Mean volume in the depletion stage in the first bioreactor (L)                                          | $8.00 \pm 0.05$   |
| Mean volume in the first bioreactor (L)                                                                 | $7.04 \pm 0.16$   |
| Mean volume in the fast loading stage in the second bioreactor (L)                                      | $5.87 \pm 0.05$   |
| Mean volume in the slow loading stage in the second bioreactor (L)                                      | $7.00 \pm 0.05$   |
| Mean volume in the depletion stage in the second bioreactor (L)                                         | $8.00 \pm 0.05$   |
| Mean volume in the starving stage in the second bioreactor (L)                                          | $8.00 \pm 0.05$   |
| Mean volume in the second bioreactor (L)                                                                | $7.54 \pm 0.22$   |
| Mean overall volume during a cycle in the two bioreactors as a whole (L)                                | $14.58 \pm 0.27$  |
| Volume of fermentation medium unloaded from the second reactor (L)                                      | $8.00 \pm 0.05$   |
| Final ethanol concentration at the time the second bioreactor was unloaded (% v/v)                      | $0.0 \pm 0.2$     |
| Mean ethanol concentration in the first bioreactor (% v/v)                                              | $4.7 \pm 0.3$     |
| Mean ethanol concentration in the second bioreactor (% v/v)                                             | $1.9 \pm 0.2$     |
| Final acetic acid concentration at the time the first bioreactor was unloaded (% w/v)                   | $9.5 \pm 0.2$     |
| Final acetic acid concentration at the time the second bioreactor was unloaded (% w/v)                  | $11.5 \pm 0.2$    |
| Mean acetic acid concentration in the first bioreactor (% w/v)                                          | $6.8 \pm 0.3$     |
| Mean acetic acid concentration in the second bioreactor (% w/v)                                         | $9.6 \pm 0.2$     |
| Mean rate of acetic acid formation in the first bioreactor (% w/v · h <sup>-1</sup> )                   | $0.18 \pm 0.01$   |
| Mean rate of acetic acid formation in the second bioreactor (% w/v · h <sup>-1</sup> )                  | $0.11 \pm 0.01$   |
| Mean overall rate of acetic acid formation in the two bioreactors as a whole (% w/v · h <sup>-1</sup> ) | $0.14 \pm 0.01$   |
| Total acetic acid production in the first bioreactor (g acetic acid · h <sup>-1</sup> )                 | $12.3 \pm 0.3$    |
| Total acetic acid production in the second bioreactor (g acetic acid · h <sup>-1</sup> )                | $8.5 \pm 0.5$     |
| Total acetic acid production in the two bioreactors as a whole (g acetic acid · h <sup>-1</sup> )       | $20.8 \pm 0.5$    |

## S2.7. Results of Experiment 7

The operating conditions used in this experiment were as follows:

- Volume unloaded from the first bioreactor: 4.25 L.
- Total ethanol concentration at the time the first bioreactor was unloaded: 4.0 % (v/v).
- Ethanol concentration during loading of the first bioreactor: 6.0 % (v/v).
- Temperature in the first bioreactor: 28 °C.
- Ethanol concentration during loading of the second bioreactor: 2.5 % (v/v).
- Temperature in the second bioreactor: 32 °C.

Figures S2.13 and S2.14 show the variation of the ethanol concentration, acidity, volume, and total and viable cells, in the first and second bioreactor, respectively. All values shown are the means of nine replications with their standard deviations.

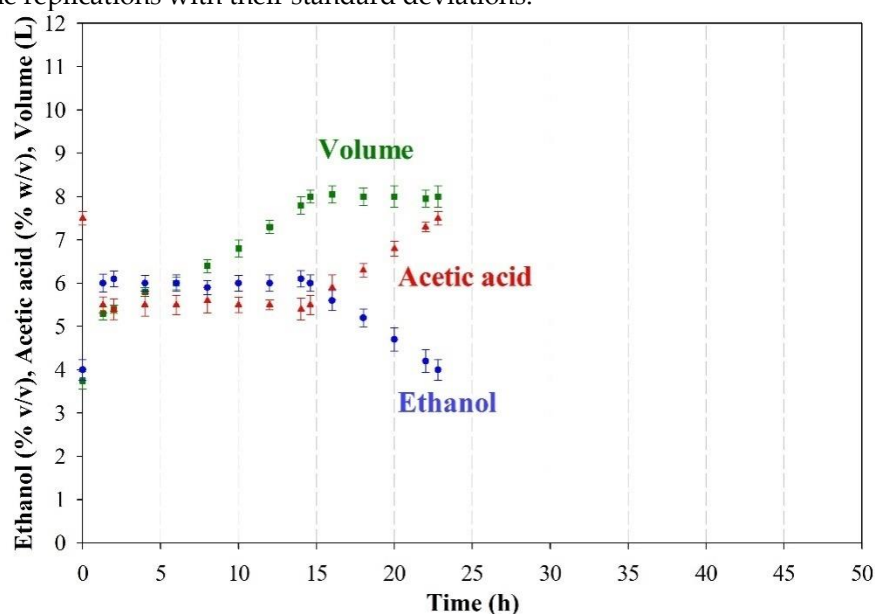

**Figure S2.13.** Time course of the ethanol concentration, acidity and volume of medium in the first bioreactor in Experiment 7.

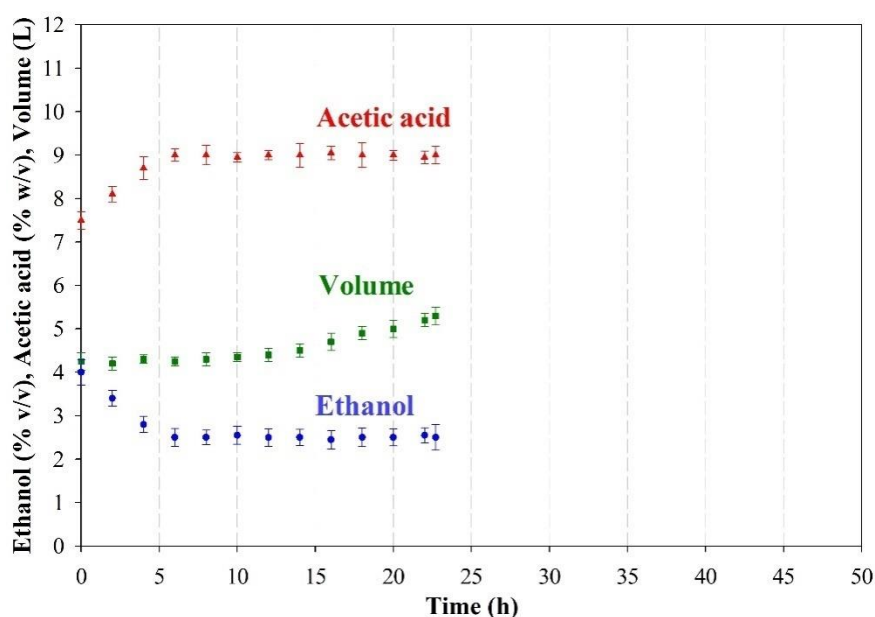

**Figure S2.14.** Time course of the ethanol concentration, acidity and volume of medium in the second bioreactor in Experiment 7.

The procedure used to obtain the different variables is described in detail in Supplementary Material 1. By way of summary, Table S2.8 shows the values for Experiment 7.

**Table S2.8.** Experimental results obtained in Experiment 7.

| Variable                                                                                 | Value             |
|------------------------------------------------------------------------------------------|-------------------|
| Total cycle duration (h)                                                                 | $22.8 \pm 0.7$    |
| Duration of the fast loading stage in the first bioreactor (h)                           | $1.3 \pm 0.1$     |
| Duration of the slow loading stage in the first bioreactor (h)                           | $13.3 \pm 0.3$    |
| Duration of the depletion stage in the first bioreactor (h)                              | $8.2 \pm 0.8$     |
| Duration of the previous depletion stage in the second bioreactor (h)                    | $6.0 \pm 0.4$     |
| Duration of the slow loading stage in the second bioreactor (h)                          | $16.7 \pm 0.7$    |
| Time fraction of the fast loading stage in the first bioreactor over the cycle duration  | $0.057 \pm 0.005$ |
| Time fraction of the slow loading stage in the first bioreactor over the cycle duration  | $0.583 \pm 0.023$ |
| Time fraction of the depletion stage in the first bioreactor over the cycle duration     | $0.360 \pm 0.035$ |
| Time fraction of the depletion stage in the second bioreactor over the cycle duration    | $0.264 \pm 0.019$ |
| Time fraction of the slow loading stage in the second bioreactor over the cycle duration | $0.736 \pm 0.037$ |
| Mean volume in the fast loading stage in the first bioreactor (L)                        | $4.53 \pm 0.05$   |
| Mean volume in the slow loading stage in the first bioreactor (L)                        | $6.65 \pm 0.05$   |
| Mean volume in the depletion stage in the first bioreactor (L)                           | $8.00 \pm 0.05$   |
| Mean volume in the first bioreactor (L)                                                  | $7.01 \pm 0.32$   |
| Mean volume in the previous depletion stage in the second bioreactor (L)                 | $4.25 \pm 0.05$   |
| Mean volume in the slow loading stage in the second bioreactor (L)                       | $4.78 \pm 0.05$   |
| Mean volume in the second bioreactor (L)                                                 | $4.64 \pm 0.20$   |
| Mean overall volume during a cycle in the two bioreactors as a whole (L)                 | $11.65 \pm 0.37$  |
| Volume of fermentation medium unloaded from the second reactor (L)                       | $5.3 \pm 0.05$    |
| Final ethanol concentration at the time the second bioreactor was unloaded (% v/v)       | $2.5 \pm 0.2$     |
| Mean ethanol concentration in the first bioreactor (% v/v)                               | $5.5 \pm 0.2$     |
| Mean ethanol concentration in the second bioreactor (% v/v)                              | $2.7 \pm 0.1$     |
| Final acetic acid concentration at the time the first bioreactor was unloaded (% w/v)    | $7.5 \pm 0.2$     |
| Final acetic acid concentration at the time the second bioreactor was unloaded (% w/v)   | $9.0 \pm 0.2$     |
| Mean acetic acid concentration in the first bioreactor (% w/v)                           | $6.0 \pm 0.2$     |

|                                                                                                         |                 |
|---------------------------------------------------------------------------------------------------------|-----------------|
| Mean acetic acid concentration in the second bioreactor (% w/v)                                         | $8.8 \pm 0.1$   |
| Mean rate of acetic acid formation in the first bioreactor (% w/v · h <sup>-1</sup> )                   | $0.20 \pm 0.01$ |
| Mean rate of acetic acid formation in second bioreactor (% w/v · h <sup>-1</sup> )                      | $0.15 \pm 0.01$ |
| Mean overall rate of acetic acid formation in the two bioreactors as a whole (% w/v · h <sup>-1</sup> ) | $0.18 \pm 0.01$ |
| Total acetic acid production in the first bioreactor (g acetic acid · h <sup>-1</sup> )                 | $14.0 \pm 0.6$  |
| Total acetic acid production in the second bioreactor (g acetic acid · h <sup>-1</sup> )                | $7.0 \pm 0.6$   |
| Total acetic acid production in the two bioreactors as a whole (g acetic acid · h <sup>-1</sup> )       | $20.9 \pm 0.8$  |

## S2.8. Results of Experiment 8

The operating conditions used in this experiment were as follows:

- Volume unloaded from the first bioreactor: 5.75 L.
- Total ethanol concentration at the time the first bioreactor was unloaded: 4.0 % (v/v).
- Ethanol concentration during loading of the first bioreactor: 6.0 % (v/v).
- Temperature in the first bioreactor: 32 °C.
- Ethanol concentration during loading of the second bioreactor: 2.5 % (v/v).
- Temperature in the second bioreactor: 28 °C.

Figures S2.15 and S2.16 show the variation of the ethanol concentration, acidity, volume, and total and viable cells, in the first and second bioreactor, respectively. All values shown are the means of five replications with their standard deviations.

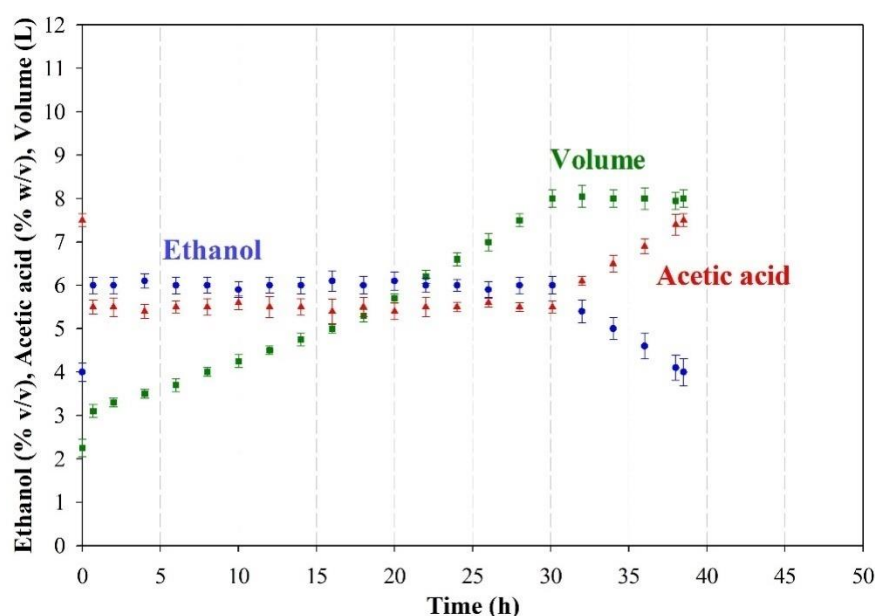

**Figure S2.15.** Time course of the ethanol concentration, acidity and volume of medium in the first bioreactor in Experiment 8.

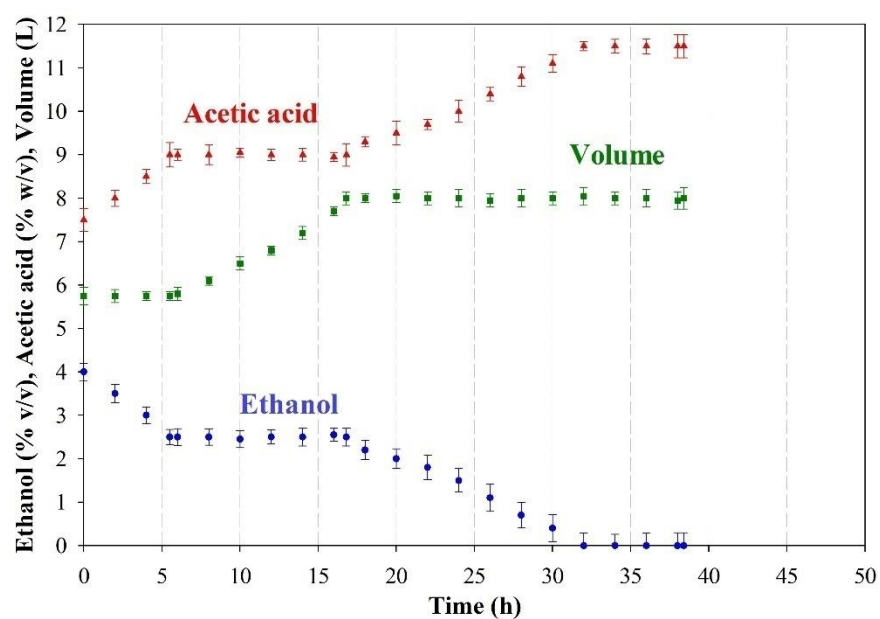

**Figure S2.16.** Time course of the ethanol concentration, acidity and volume of medium in the second bioreactor in Experiment 8.

The procedure used to obtain the different variables is described in detail in Supplementary Material 1. By way of summary, Table S2.9 shows the values for Experiment 8.

**Table S2.9.** Experimental results obtained in Experiment 8.

| Variable                                                                                       | Value             |
|------------------------------------------------------------------------------------------------|-------------------|
| Total cycle duration (h)                                                                       | $38.5 \pm 0.5$    |
| Duration of the fast loading stage in the first bioreactor (h)                                 | $0.7 \pm 0.1$     |
| Duration of the slow loading stage in the first bioreactor (h)                                 | $29.4 \pm 0.3$    |
| Duration of the depletion stage in the first bioreactor (h)                                    | $8.4 \pm 0.6$     |
| Duration of the previous depletion stage in the second bioreactor (h)                          | $5.5 \pm 0.2$     |
| Duration of the slow loading stage in the second bioreactor (h)                                | $11.3 \pm 0.4$    |
| Duration of the depletion stage in the second bioreactor (h)                                   | $15.2 \pm 0.8$    |
| Duration of the starving stage in the second bioreactor (h)                                    | $6.4 \pm 1.0$     |
| Time fraction of the fast loading stage in the first bioreactor over the cycle duration        | $0.018 \pm 0.003$ |
| Time fraction of the slow loading stage in the first bioreactor over the cycle duration        | $0.764 \pm 0.013$ |
| Time fraction of the depletion stage in the first bioreactor over the cycle duration           | $0.218 \pm 0.015$ |
| Time fraction of the previous depletion stage in the second bioreactor over the cycle duration | $0.143 \pm 0.006$ |
| Time fraction of the slow loading stage in the second bioreactor over the cycle duration       | $0.294 \pm 0.013$ |
| Time fraction of the depletion stage in the second bioreactor over the cycle duration          | $0.396 \pm 0.022$ |
| Time fraction of the starving stage in the second bioreactor over the cycle duration           | $0.167 \pm 0.026$ |
| Mean volume in the fast loading stage in the first bioreactor (L)                              | $2.68 \pm 0.05$   |
| Mean volume in the slow loading stage in the first bioreactor (L)                              | $5.55 \pm 0.05$   |
| Mean volume in the depletion stage in the first bioreactor (L)                                 | $8.00 \pm 0.05$   |
| Mean volume in the first bioreactor (L)                                                        | $6.03 \pm 0.14$   |
| Mean volume in the previous depletion stage in the second bioreactor (L)                       | $5.75 \pm 0.05$   |
| Mean volume in the slow loading stage in the second bioreactor (L)                             | $6.88 \pm 0.05$   |
| Mean volume in the depletion stage in the second bioreactor (L)                                | $8.00 \pm 0.05$   |
| Mean volume in the starving stage in the second bioreactor (L)                                 | $8.00 \pm 0.05$   |
| Mean volume in the second bioreactor (L)                                                       | $7.35 \pm 0.29$   |
| Mean overall volume during a cycle in the two bioreactors as a whole (L)                       | $13.38 \pm 0.32$  |
| Volume of fermentation medium unloaded from the second reactor (L)                             | $8.00 \pm 0.05$   |

|                                                                                                         |                 |
|---------------------------------------------------------------------------------------------------------|-----------------|
| Final ethanol concentration at the time the second bioreactor was unloaded (% v/v)                      | $0.0 \pm 0.2$   |
| Mean ethanol concentration in the first bioreactor (% v/v)                                              | $5.6 \pm 0.2$   |
| Mean ethanol concentration in the second bioreactor (% v/v)                                             | $2.1 \pm 0.2$   |
| Final acetic acid concentration at the time the first bioreactor was unloaded (% w/v)                   | $7.5 \pm 0.2$   |
| Final acetic acid concentration at the time the second bioreactor was unloaded (% w/v)                  | $11.5 \pm 0.2$  |
| Mean acetic acid concentration in the first bioreactor (% w/v)                                          | $5.9 \pm 0.2$   |
| Mean acetic acid concentration in the second bioreactor (% w/v)                                         | $9.4 \pm 0.2$   |
| Mean rate of acetic acid formation in the first bioreactor (% w/v · h <sup>-1</sup> )                   | $0.19 \pm 0.01$ |
| Mean rate of acetic acid formation in second bioreactor (% w/v · h <sup>-1</sup> )                      | $0.17 \pm 0.01$ |
| Mean overall rate of acetic acid formation in the two bioreactors as a whole (% w/v · h <sup>-1</sup> ) | $0.18 \pm 0.01$ |
| Total acetic acid production in the first bioreactor (g acetic acid · h <sup>-1</sup> )                 | $11.2 \pm 0.3$  |
| Total acetic acid production in the second bioreactor (g acetic acid · h <sup>-1</sup> )                | $12.7 \pm 0.6$  |
| Total acetic acid production in the two bioreactors as a whole (g acetic acid · h <sup>-1</sup> )       | $23.9 \pm 0.5$  |

## S2.9. Results of Experiment 9

The operating conditions used in this experiment were as follows:

- Volume unloaded from the first bioreactor: 4.25 L.
- Total ethanol concentration at the time the first bioreactor was unloaded: 2.0 % (v/v).
- Ethanol concentration during loading of the first bioreactor: 4.0 % (v/v).
- Temperature in the first bioreactor: 28 °C.
- Ethanol concentration during loading of the second bioreactor: 4.5 % (v/v).
- Temperature in the second bioreactor: 32 °C.

Figures S2.17 and S2.18 show the variation of the ethanol concentration, acidity, volume, and total and viable cells, in the first and second bioreactor, respectively. All values shown are the means of thirteen replications with their standard deviations.



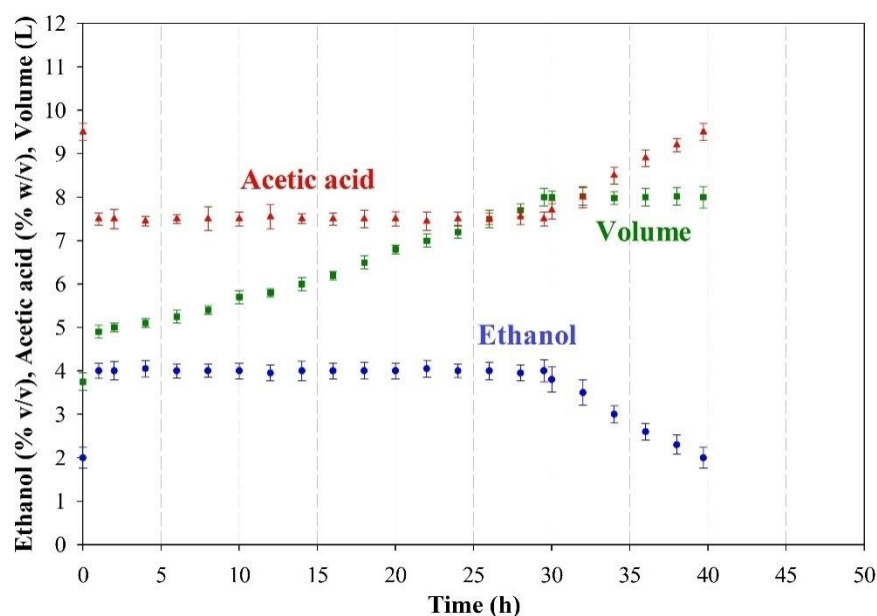

**Figure S2.17.** Time course of the ethanol concentration, acidity and volume of medium in the first bioreactor in Experiment 9.

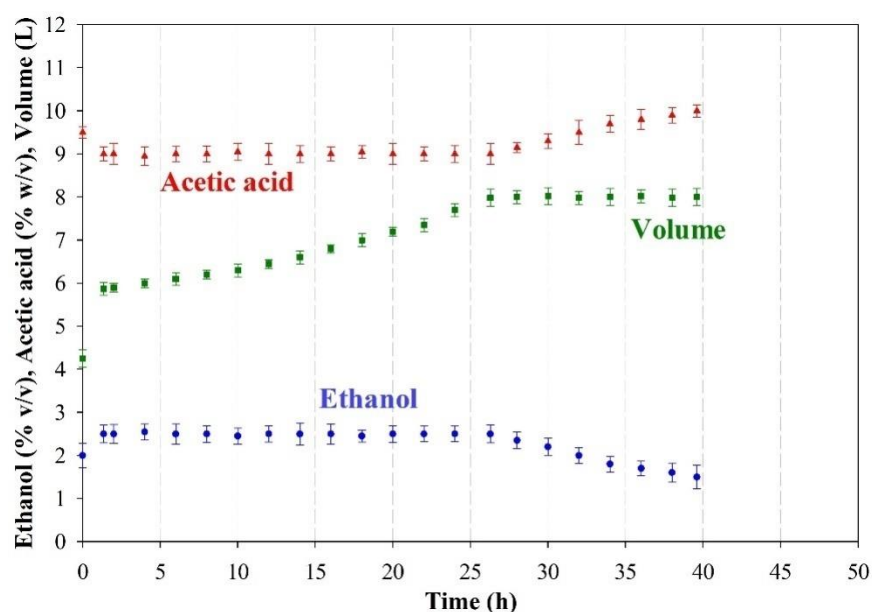

**Figure S2.18.** Time course of the ethanol concentration, acidity and volume of medium in the second bioreactor in Experiment 9.

The procedure used to obtain the different variables is described in detail in Supplementary Material 1. By way of summary, Table S2.10 shows the values for Experiment 9.

**Table S2.10.** Experimental results obtained in Experiment 9.

| Variable                                                       | Value          |
|----------------------------------------------------------------|----------------|
| Total cycle duration (h)                                       | $39.7 \pm 0.9$ |
| Duration of the fast loading stage in the first bioreactor (h) | $1.0 \pm 0.1$  |
| Duration of the slow loading stage in the first bioreactor (h) | $28.5 \pm 0.7$ |
| Duration of the depletion stage in the first bioreactor (h)    | $10.2 \pm 1.1$ |

|                                                                                          |                   |
|------------------------------------------------------------------------------------------|-------------------|
| Duration of the fast loading stage in the second bioreactor (h)                          | $1.4 \pm 0.1$     |
| Duration of the slow loading stage in the second bioreactor (h)                          | $24.9 \pm 0.3$    |
| Duration of the depletion stage in the second bioreactor (h)                             | $13.3 \pm 0.7$    |
| Time fraction of the fast loading stage in the first bioreactor over the cycle duration  | $0.025 \pm 0.003$ |
| Time fraction of the slow loading stage in the first bioreactor over the cycle duration  | $0.718 \pm 0.024$ |
| Time fraction of the depletion stage in the first bioreactor over the cycle duration     | $0.257 \pm 0.029$ |
| Time fraction of the fast loading stage in the second bioreactor over the cycle duration | $0.034 \pm 0.003$ |
| Time fraction of the slow loading stage in the second bioreactor over the cycle duration | $0.630 \pm 0.013$ |
| Time fraction of the depletion stage in the second bioreactor over the cycle duration    | $0.336 \pm 0.018$ |
| Mean volume in the fast loading stage in the first bioreactor (L)                        | $4.33 \pm 0.05$   |
| Mean volume in the slow loading stage in the first bioreactor (L)                        | $6.46 \pm 0.05$   |
| Mean volume in the depletion stage in the first bioreactor (L)                           | $8.02 \pm 0.05$   |
| Mean volume in the first bioreactor (L)                                                  | $6.81 \pm 0.28$   |
| Mean volume in the fast loading stage in the second bioreactor (L)                       | $5.06 \pm 0.05$   |
| Mean volume in the slow loading stage in the second bioreactor (L)                       | $6.93 \pm 0.05$   |
| Mean volume in the depletion stage in the second bioreactor (L)                          | $7.98 \pm 0.05$   |
| Mean volume in the second bioreactor (L)                                                 | $7.22 \pm 0.17$   |
| Mean overall volume during a cycle in the two bioreactors as a whole (L)                 | $14.02 \pm 0.33$  |
| Volume of fermentation medium unloaded from the second reactor (L)                       | $7.98 \pm 0.05$   |
| Final ethanol concentration at the time the second bioreactor was unloaded (% v/v)       | $1.5 \pm 0.2$     |
| Mean ethanol concentration in the first bioreactor (% v/v)                               | $3.6 \pm 0.1$     |
| Mean ethanol concentration in the second bioreactor (% v/v)                              | $2.3 \pm 0.1$     |
| Final acetic acid concentration at the time the first bioreactor was unloaded (% w/v)    | $9.6 \pm 0.2$     |
| Final acetic acid concentration at the time the second bioreactor was unloaded (% w/v)   | $10.0 \pm 0.2$    |
| Mean acetic acid concentration in the first bioreactor (% w/v)                           | $7.9 \pm 0.1$     |
| Mean acetic acid concentration in the second bioreactor (% w/v)                          | $9.2 \pm 0.1$     |
| Mean rate of acetic acid formation in the first bioreactor (% w/v · h <sup>-1</sup> )    | $0.15 \pm 0.01$   |

|                                                                                                         |             |
|---------------------------------------------------------------------------------------------------------|-------------|
| Mean rate of acetic acid formation in second bioreactor (% w/v · h <sup>-1</sup> )                      | 0.14 ± 0.01 |
| Mean overall rate of acetic acid formation in the two bioreactors as a whole (% w/v · h <sup>-1</sup> ) | 0.14 ± 0.01 |
| Total acetic acid production in the first bioreactor (g acetic acid · h <sup>-1</sup> )                 | 10.3 ± 0.3  |
| Total acetic acid production in the second bioreactor (g acetic acid · h <sup>-1</sup> )                | 9.9 ± 0.5   |
| Total acetic acid production in the two bioreactors as a whole (g acetic acid · h <sup>-1</sup> )       | 20.1 ± 0.6  |

## S2.10. Results of Experiment 10

The operating conditions used in this experiment were as follows:

- Volume unloaded from the first bioreactor: 5.75 L.
- Total ethanol concentration at the time the first bioreactor was unloaded: 2.0 % (v/v).
- Ethanol concentration during loading of the first bioreactor: 4.0 % (v/v).
- Temperature in the first bioreactor: 32 °C.
- Ethanol concentration during loading of the second bioreactor: 4.5 % (v/v).
- Temperature in the second bioreactor: 28 °C.

Figures S2.19 and S2.20 show the variation of the ethanol concentration, acidity, volume, and total and viable cells, in the first and second bioreactor, respectively. All values shown are the means of five replications with their standard deviations.

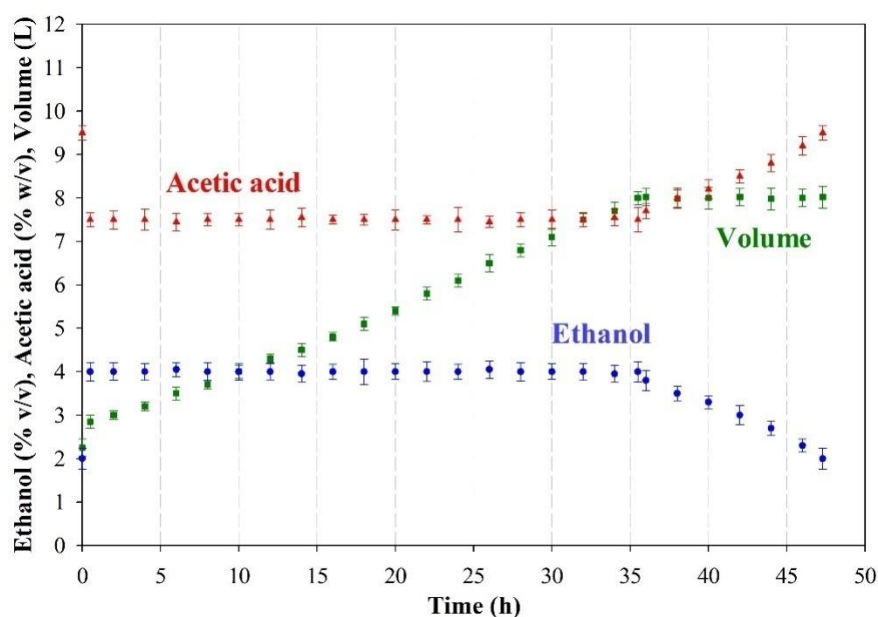

**Figure S2.19.** Time course of the ethanol concentration, acidity and volume of medium in the first bioreactor in Experiment 10.

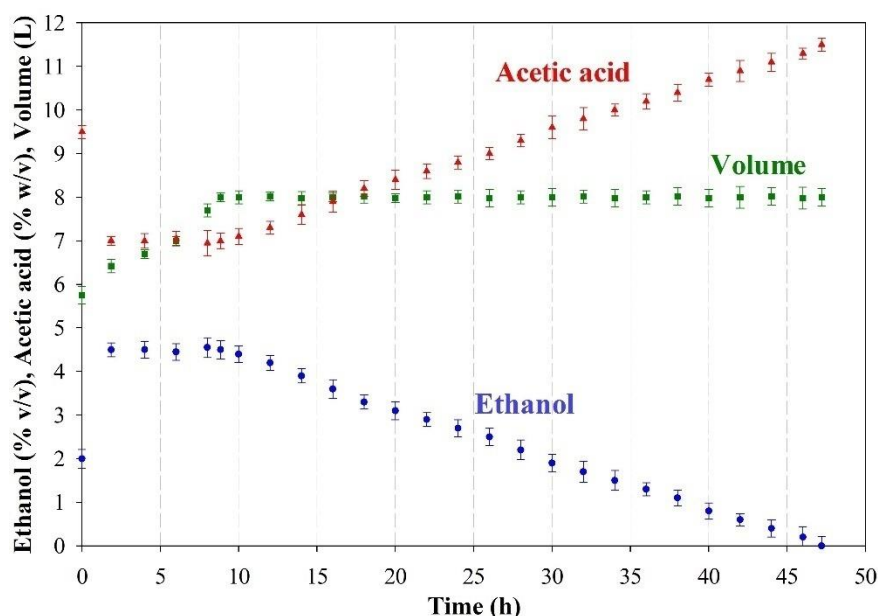

**Figure S2.20.** Time course of the ethanol concentration, acidity and volume of medium in the second bioreactor in Experiment 10.

The procedure used to obtain the different variables is described in detail in Supplementary Material 1. By way of summary, Table S2.11 shows the values for Experiment 10.

**Table S2.11.** Experimental results obtained in Experiment 10

| Variable                                                                                 | Value         |
|------------------------------------------------------------------------------------------|---------------|
| Total cycle duration (h)                                                                 | 47.3 ± 0.6    |
| Duration of the fast loading stage in the first bioreactor (h)                           | 0.5 ± 0.1     |
| Duration of the slow loading stage in the first bioreactor (h)                           | 35.0 ± 0.4    |
| Duration of the depletion stage in the first bioreactor (h)                              | 11.8 ± 0.7    |
| Duration of the fast loading stage in the second bioreactor (h)                          | 1.9 ± 0.1     |
| Duration of the slow loading stage in the second bioreactor (h)                          | 7.0 ± 0.4     |
| Duration of the depletion stage in the second bioreactor (h)                             | 38.4 ± 0.8    |
| Time fraction of the fast loading stage in the first bioreactor over the cycle duration  | 0.011 ± 0.002 |
| Time fraction of the slow loading stage in the first bioreactor over the cycle duration  | 0.740 ± 0.013 |
| Time fraction of the depletion stage in the first bioreactor over the cycle duration     | 0.250 ± 0.016 |
| Time fraction of the fast loading stage in the second bioreactor over the cycle duration | 0.039 ± 0.001 |
| Time fraction of the slow loading stage in the second bioreactor over the cycle duration | 0.148 ± 0.009 |
| Time fraction of the depletion stage in the second bioreactor over the cycle duration    | 0.813 ± 0.021 |
| Mean volume in the fast loading stage in the first bioreactor (L)                        | 2.55 ± 0.05   |

|                                                                                                         |                  |
|---------------------------------------------------------------------------------------------------------|------------------|
| Mean volume in the slow loading stage in the first bioreactor (L)                                       | $5.43 \pm 0.05$  |
| Mean volume in the depletion stage in the first bioreactor (L)                                          | $8.00 \pm 0.05$  |
| Mean volume in the first bioreactor (L)                                                                 | $6.04 \pm 0.14$  |
| Mean volume in the fast loading stage in the second bioreactor (L)                                      | $6.68 \pm 0.05$  |
| Mean volume in the slow loading stage in the second bioreactor (L)                                      | $7.80 \pm 0.05$  |
| Mean volume in the depletion stage in the second bioreactor (L)                                         | $8.00 \pm 0.05$  |
| Mean volume in the second bioreactor (L)                                                                | $7.92 \pm 0.18$  |
| Mean overall volume during a cycle in the two bioreactors as a whole (L)                                | $13.96 \pm 0.23$ |
| Volume of fermentation medium unloaded from the second reactor (L)                                      | $8.00 \pm 0.05$  |
| Final ethanol concentration at the time the second bioreactor was unloaded (% v/v)                      | $0.0 \pm 0.2$    |
| Mean ethanol concentration in the first bioreactor (% v/v)                                              | $3.7 \pm 0.1$    |
| Mean ethanol concentration in the second bioreactor (% v/v)                                             | $2.6 \pm 0.3$    |
| Final acetic acid concentration at the time the first bioreactor was unloaded (% w/v)                   | $9.5 \pm 0.2$    |
| Final acetic acid concentration at the time the second bioreactor was unloaded (% w/v)                  | $11.6 \pm 0.2$   |
| Mean acetic acid concentration in the first bioreactor (% w/v)                                          | $7.8 \pm 0.1$    |
| Mean acetic acid concentration in the second bioreactor (% w/v)                                         | $8.9 \pm 0.3$    |
| Mean rate of acetic acid formation in the first bioreactor (% w/v · h <sup>-1</sup> )                   | $0.19 \pm 0.01$  |
| Mean rate of acetic acid formation in second bioreactor (% w/v · h <sup>-1</sup> )                      | $0.10 \pm 0.01$  |
| Mean overall rate of acetic acid formation in the two bioreactors as a whole (% w/v · h <sup>-1</sup> ) | $0.14 \pm 0.01$  |
| Total acetic acid production in the first bioreactor (g acetic acid · h <sup>-1</sup> )                 | $11.5 \pm 0.3$   |
| Total acetic acid production in the second bioreactor (g acetic acid · h <sup>-1</sup> )                | $8.1 \pm 0.4$    |
| Total acetic acid production in the two bioreactors as a whole (g acetic acid · h <sup>-1</sup> )       | $19.6 \pm 0.4$   |

## S2.11. Results of Experiment 11

The operating conditions used in this experiment were as follows:

- Volume unloaded from the first bioreactor: 4.25 L.
- Total ethanol concentration at the time the first bioreactor was unloaded: 4.0 % (v/v).
- Ethanol concentration during loading of the first bioreactor: 4.0 % (v/v).
- Temperature in the first bioreactor: 32 °C.
- Ethanol concentration during loading of the second bioreactor: 4.5 % (v/v).
- Temperature in the second bioreactor: 28 °C.

Figures S2.21 and S2.22 show the variation of the ethanol concentration, acidity, volume, and total and viable cells, in the first and second bioreactor, respectively. All values shown are the means of thirteen replications with their standard deviations.

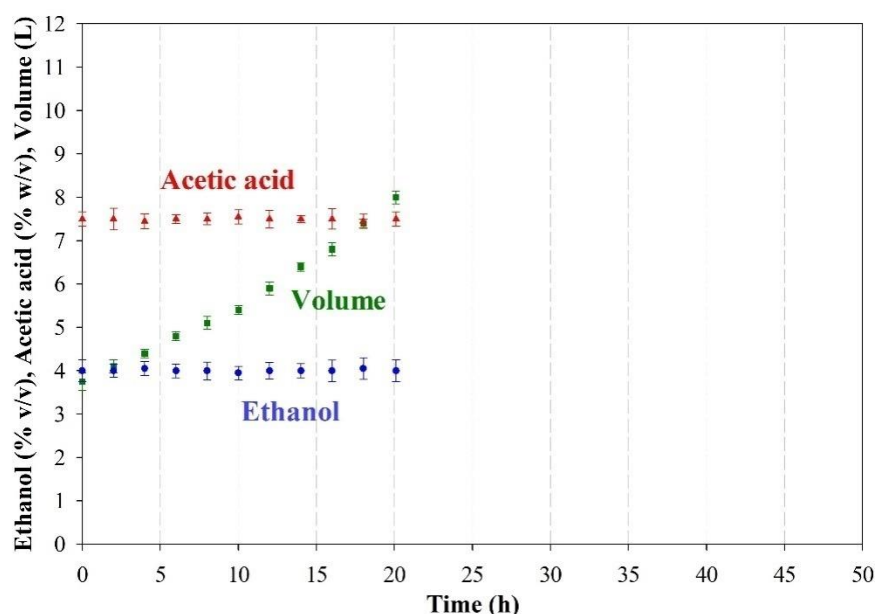

**Figure S2.21.** Time course of the ethanol concentration, acidity and volume of medium in the first bioreactor in Experiment 11.

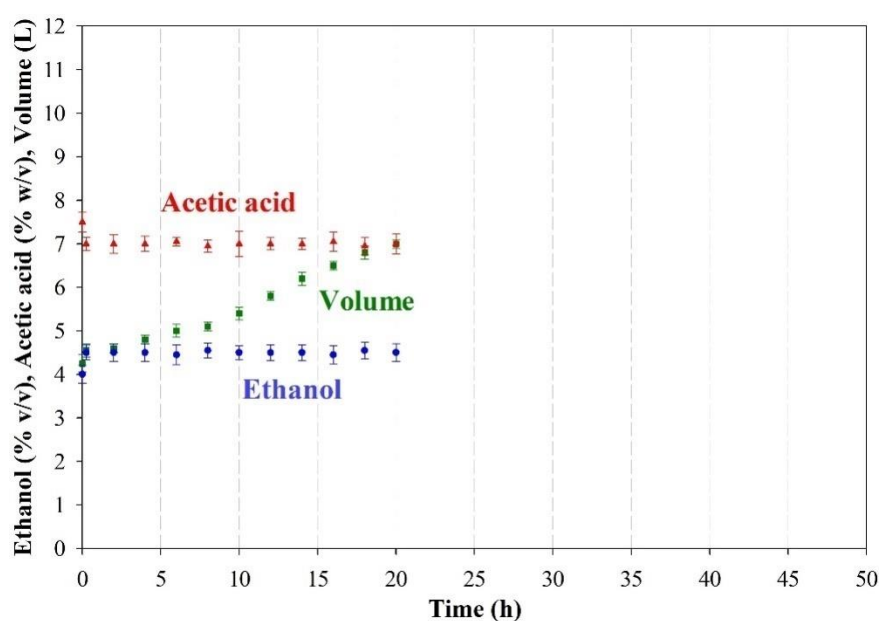

**Figure S2.22.** Time course of the ethanol concentration, acidity and volume of medium in the second bioreactor in Experiment 11.

The procedure used to obtain the different variables is described in detail in Supplementary Material 1. By way of summary, Table S2.12 shows the values for Experiment 11.

**Table S2.12.** Experimental results obtained in Experiment 11

| Variable                 | Value      |
|--------------------------|------------|
| Total cycle duration (h) | 20.1 ± 0.6 |

---

|                                                                                                         |                   |
|---------------------------------------------------------------------------------------------------------|-------------------|
| Duration of the slow loading stage in the first bioreactor (h)                                          | $20.1 \pm 0.6$    |
| Duration of the fast loading stage in the second bioreactor (h)                                         | $0.3 \pm 0.1$     |
| Duration of the slow loading stage in the second bioreactor (h)                                         | $19.8 \pm 0.6$    |
| Time fraction of the slow loading stage in the first bioreactor over the cycle duration                 | $1.0 \pm 0.042$   |
| Time fraction of the fast loading stage in the second bioreactor over the cycle duration                | $0.013 \pm 0.005$ |
| Time fraction of the slow loading stage in the second bioreactor over the cycle duration                | $0.998 \pm 0.042$ |
| Mean volume in the slow loading stage in the first bioreactor (L)                                       | $5.89 \pm 0.05$   |
| Mean volume in the first bioreactor (L)                                                                 | $5.89 \pm 0.42$   |
| Mean volume in the fast loading stage in the second bioreactor (L)                                      | $4.4 \pm 0.05$    |
| Mean volume in the slow loading stage in the second bioreactor (L)                                      | $5.78 \pm 0.05$   |
| Mean volume in the second bioreactor (L)                                                                | $5.76 \pm 0.25$   |
| Mean overall volume during a cycle in the two bioreactors as a whole (L)                                | $11.65 \pm 0.49$  |
| Volume of fermentation medium unloaded from the second reactor (L)                                      | $7.00 \pm 0.05$   |
| Final ethanol concentration at the time the second bioreactor was unloaded (% v/v)                      | $4.5 \pm 0.2$     |
| Mean ethanol concentration in the first bioreactor (% v/v)                                              | $4.0 \pm 0.1$     |
| Mean ethanol concentration in the second bioreactor (% v/v)                                             | $4.5 \pm 0.1$     |
| Final acetic acid concentration at the time the first bioreactor was unloaded (% w/v)                   | $7.5 \pm 0.2$     |
| Final acetic acid concentration at the time the second bioreactor was unloaded (% w/v)                  | $7.0 \pm 0.2$     |
| Mean acetic acid concentration in the first bioreactor (% w/v)                                          | $7.5 \pm 0.1$     |
| Mean acetic acid concentration in the second bioreactor (% w/v)                                         | $7.0 \pm 0.1$     |
| Mean rate of acetic acid formation in the first bioreactor (% w/v · h <sup>-1</sup> )                   | $0.27 \pm 0.02$   |
| Mean rate of acetic acid formation in second bioreactor (% w/v · h <sup>-1</sup> )                      | $0.15 \pm 0.02$   |
| Mean overall rate of acetic acid formation in the two bioreactors as a whole (% w/v · h <sup>-1</sup> ) | $0.21 \pm 0.01$   |
| Total acetic acid production in the first bioreactor (g acetic acid · h <sup>-1</sup> )                 | $15.9 \pm 0.6$    |
| Total acetic acid production in the second bioreactor (g acetic acid · h <sup>-1</sup> )                | $8.6 \pm 0.9$     |
| Total acetic acid production in the two bioreactors as a whole (g acetic acid · h <sup>-1</sup> )       | $24.4 \pm 1.0$    |

---

### S2.12. Results of Experiment 12

The operating conditions used in this experiment were as follows:

- Volume unloaded from the first bioreactor: 5.75 L.
- Total ethanol concentration at the time the first bioreactor was unloaded: 4.0 % (v/v).
- Ethanol concentration during loading of the first bioreactor: 4.0 % (v/v).
- Temperature in the first bioreactor: 28 °C.
- Ethanol concentration during loading of the second bioreactor: 4.5 % (v/v).
- Temperature in the second bioreactor: 32 °C.

Figures S2.23 and S2.24 show the variation of the ethanol concentration, acidity, volume, and total and viable cells, in the first and second bioreactor, respectively. All values shown are the means of ten replications with their standard deviations.

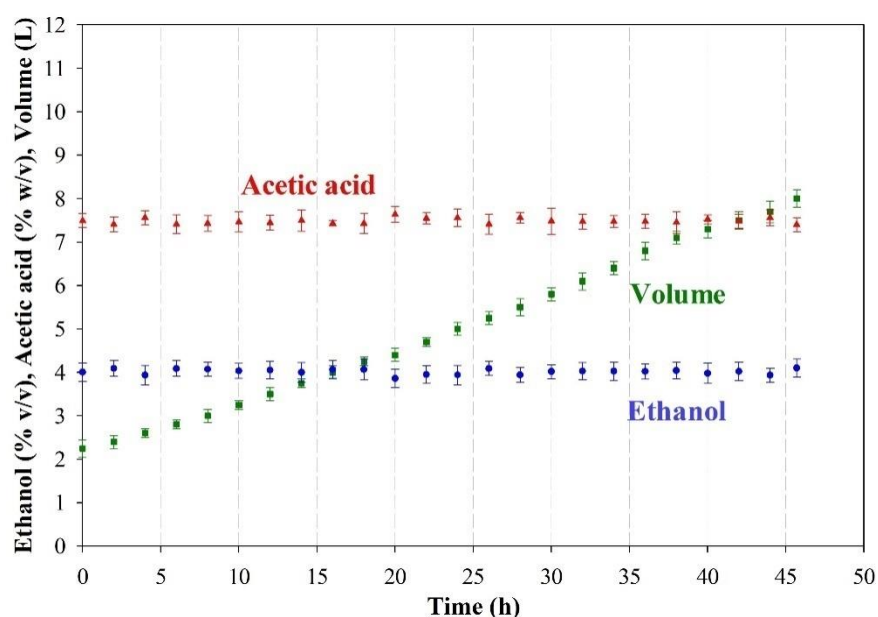

**Figure S2.23.** Time course of the ethanol concentration, acidity and volume of medium in the first bioreactor in Experiment 12.

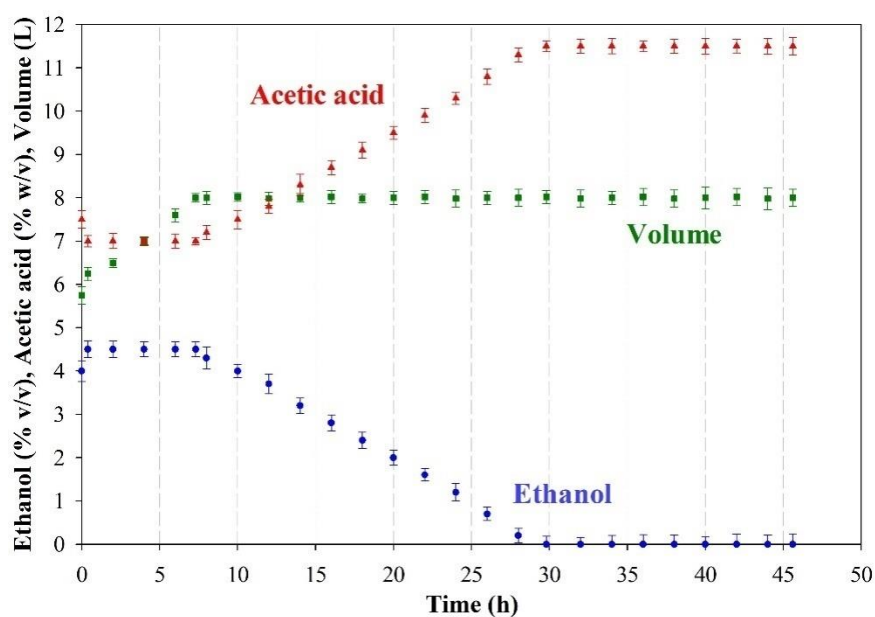

**Figure S2.24.** Time course of the ethanol concentration, acidity and volume of medium in the second bioreactor in Experiment 12.



The procedure used to obtain the different variables is described in detail in Supplementary Material 1. By way of summary, Table S2.13 shows the values for Experiment 12.

**Table S2.13.** Experimental results obtained in Experiment 12

| Variable                                                                                 | Value         |
|------------------------------------------------------------------------------------------|---------------|
| Total cycle duration (h)                                                                 | 45.7 ± 1.2    |
| Duration of the slow loading stage in the first bioreactor (h)                           | 45.7 ± 1.2    |
| Duration of the fast loading stage in the second bioreactor (h)                          | 0.4 ± 0.1     |
| Duration of the slow loading stage in the second bioreactor (h)                          | 6.9 ± 0.6     |
| Duration of the depletion stage in the second bioreactor (h)                             | 22.5 ± 1.0    |
| Duration of starving in stage the second bioreactor (h)                                  | 15.8 ± 1.3    |
| Time fraction of the slow loading stage in the first bioreactor over the cycle duration  | 1.000 ± 0.037 |
| Time fraction of the fast loading stage in the second bioreactor over the cycle duration | 0.009 ± 0.002 |
| Time fraction of the slow loading stage in the second bioreactor over the cycle duration | 0.151 ± 0.014 |
| Time fraction of the depletion stage in the second bioreactor over the cycle duration    | 0.493 ± 0.024 |
| Time fraction of the starving stage in the second bioreactor over the cycle duration     | 0.346 ± 0.029 |
| Mean volume in the slow loading stage in the first bioreactor (L)                        | 5.13 ± 0.05   |
| Mean volume in the first bioreactor (L)                                                  | 5.13 ± 0.19   |
| Mean volume in the fast loading stage in the second bioreactor (L)                       | 6.00 ± 0.05   |
| Mean volume in the slow loading stage in the second bioreactor (L)                       | 7.13 ± 0.05   |
| Mean volume in the depletion stage in the second bioreactor (L)                          | 8.00 ± 0.05   |
| Mean volume in the starving stage in the second bioreactor (L)                           | 8.00 ± 0.05   |
| Mean volume in the second bioreactor (L)                                                 | 7.85 ± 0.32   |
| Mean overall volume during a cycle in the two bioreactors as a whole (L)                 | 12.98 ± 0.37  |
| Volume of fermentation medium unloaded from the second reactor (L)                       | 8.00 ± 0.05   |
| Final ethanol concentration at the time the second bioreactor was unloaded (% v/v)       | 0.0 ± 0.2     |
| Mean ethanol concentration in the first bioreactor (% v/v)                               | 4.0 ± 0.1     |
| Mean ethanol concentration in the second bioreactor (% v/v)                              | 2.9 ± 0.4     |
| Final acetic acid concentration at the time the first bioreactor was unloaded (% w/v)    | 7.5 ± 0.2     |
| Final acetic acid concentration at the time the second bioreactor was unloaded (% w/v)   | 11.5 ± 0.2    |
| Mean acetic acid concentration in the first bioreactor (% w/v)                           | 7.5 ± 0.1     |

|                                                                                                         |                 |
|---------------------------------------------------------------------------------------------------------|-----------------|
| Mean acetic acid concentration in the second bioreactor (% w/v)                                         | $8.6 \pm 0.4$   |
| Mean rate of acetic acid formation in the first bioreactor (% w/v · h <sup>-1</sup> )                   | $0.18 \pm 0.01$ |
| Mean rate of acetic acid formation in second bioreactor (% w/v · h <sup>-1</sup> )                      | $0.14 \pm 0.01$ |
| Mean overall rate of acetic acid formation in the two bioreactors as a whole (% w/v · h <sup>-1</sup> ) | $0.16 \pm 0.01$ |
| Total acetic acid production in the first bioreactor (g acetic acid · h <sup>-1</sup> )                 | $9.4 \pm 0.4$   |
| Total acetic acid production in the second bioreactor (g acetic acid · h <sup>-1</sup> )                | $10.7 \pm 0.5$  |
| Total acetic acid production in the two bioreactors as a whole (g acetic acid · h <sup>-1</sup> )       | $20.1 \pm 0.6$  |

### S2.13. Results of Experiment 13

The operating conditions used in this experiment were as follows:

- Volume unloaded from the first bioreactor: 4.25 L.
- Total ethanol concentration at the time the first bioreactor was unloaded: 2.0 % (v/v).
- Ethanol concentration during loading of the first bioreactor: 6.0 % (v/v).
- Temperature in the first bioreactor: 32 °C.
- Ethanol concentration during loading of the second bioreactor: 4.5 % (v/v).
- Temperature in the second bioreactor: 32 °C.

Figures S2.25 and S2.26 show the variation of the ethanol concentration, acidity, volume, and total and viable cells, in the first and second bioreactor, respectively. All values shown are the means of twelve replications with their standard deviations.

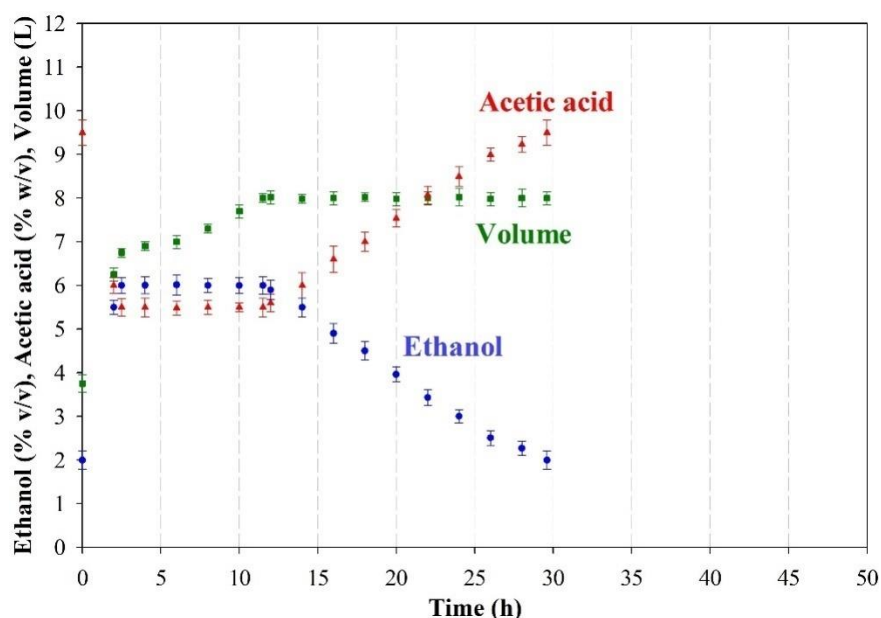

**Figure S2.25.** Time course of the ethanol concentration, acidity and volume of medium in the first bioreactor in Experiment 13.

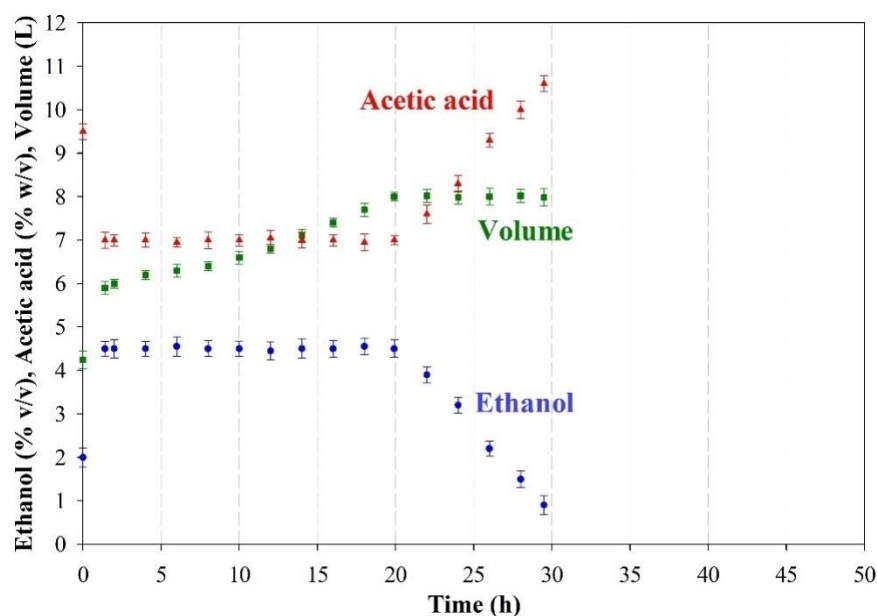

**Figure S2.26.** Time course of the ethanol concentration, acidity and volume of medium in the second bioreactor in Experiment 13.

The procedure used to obtain the different variables is described in detail in Supplementary Material 1. By way of summary, Table S2.14 shows the values for Experiment 13.

**Table S2.14.** Experimental results obtained in Experiment 13

| Variable                                                                                 | Value             |
|------------------------------------------------------------------------------------------|-------------------|
| Total cycle duration (h)                                                                 | $29.6 \pm 0.8$    |
| Duration of the fast loading stage in the first bioreactor (h)                           | $2.5 \pm 0.1$     |
| Duration of the slow loading stage in the first bioreactor (h)                           | $9.0 \pm 0.6$     |
| Duration of the depletion stage in the first bioreactor (h)                              | $18.1 \pm 1.0$    |
| Duration of the fast loading stage in the second bioreactor (h)                          | $1.4 \pm 0.3$     |
| Duration of the slow loading stage in the second bioreactor (h)                          | $18.5 \pm 0.6$    |
| Duration of the depletion stage in the second bioreactor (h)                             | $9.6 \pm 0.9$     |
| Time fraction of the fast loading stage in the first bioreactor over the cycle duration  | $0.084 \pm 0.004$ |
| Time fraction of the slow loading stage in the first bioreactor over the cycle duration  | $0.304 \pm 0.022$ |
| Time fraction of the depletion stage in the first bioreactor over the cycle duration     | $0.611 \pm 0.038$ |
| Time fraction of the fast loading stage in the second bioreactor over the cycle duration | $0.047 \pm 0.010$ |
| Time fraction of the slow loading stage in the second bioreactor over the cycle duration | $0.627 \pm 0.025$ |
| Time fraction of the depletion stage in the second bioreactor over the cycle duration    | $0.325 \pm 0.030$ |
| Mean volume in the fast loading stage in the first bioreactor (L)                        | $5.25 \pm 0.05$   |

|                                                                                                         |                  |
|---------------------------------------------------------------------------------------------------------|------------------|
| Mean volume in the slow loading stage in the first bioreactor (L)                                       | $7.38 \pm 0.05$  |
| Mean volume in the depletion stage in the first bioreactor (L)                                          | $8.00 \pm 0.05$  |
| Mean volume in the first bioreactor (L)                                                                 | $7.58 \pm 0.34$  |
| Mean volume in the fast loading stage in the second bioreactor (L)                                      | $5.08 \pm 0.05$  |
| Mean volume in the slow loading stage in the second bioreactor (L)                                      | $6.95 \pm 0.05$  |
| Mean volume in the depletion stage in the second bioreactor (L)                                         | $8.00 \pm 0.05$  |
| Mean volume in the second bioreactor (L)                                                                | $7.20 \pm 0.30$  |
| Mean overall volume during a cycle in the two bioreactors as a whole (L)                                | $14.78 \pm 0.46$ |
| Volume of fermentation medium unloaded from the second reactor (L)                                      | $8.00 \pm 0.05$  |
| Final ethanol concentration at the time the second bioreactor was unloaded (% v/v)                      | $0.9 \pm 0.2$    |
| Mean ethanol concentration in the first bioreactor (% v/v)                                              | $4.5 \pm 0.4$    |
| Mean ethanol concentration in the second bioreactor (% v/v)                                             | $3.7 \pm 0.3$    |
| Final acetic acid concentration at the time the first bioreactor was unloaded (% w/v)                   | $9.5 \pm 0.2$    |
| Final acetic acid concentration at the time the second bioreactor was unloaded (% w/v)                  | $10.6 \pm 0.2$   |
| Mean acetic acid concentration in the first bioreactor (% w/v)                                          | $7.0 \pm 0.4$    |
| Mean acetic acid concentration in the second bioreactor (% w/v)                                         | $7.8 \pm 0.3$    |
| Mean rate of acetic acid formation in the first bioreactor (% w/v · h <sup>-1</sup> )                   | $0.18 \pm 0.01$  |
| Mean rate of acetic acid formation in second bioreactor (% w/v · h <sup>-1</sup> )                      | $0.21 \pm 0.01$  |
| Mean overall rate of acetic acid formation in the two bioreactors as a whole (% w/v · h <sup>-1</sup> ) | $0.19 \pm 0.01$  |
| Total acetic acid production in the first bioreactor (g acetic acid · h <sup>-1</sup> )                 | $13.6 \pm 0.5$   |
| Total acetic acid production in the second bioreactor (g acetic acid · h <sup>-1</sup> )                | $15.1 \pm 0.7$   |
| Total acetic acid production in the two bioreactors as a whole (g acetic acid · h <sup>-1</sup> )       | $28.6 \pm 0.9$   |

## S2.14. Results of Experiment 14

The operating conditions used in this experiment were as follows:

- Volume unloaded from the first bioreactor: 5.75 L.
- Total ethanol concentration at the time the first bioreactor was unloaded: 2.0 % (v/v).
- Ethanol concentration during loading of the first bioreactor: 6.0 % (v/v).
- Temperature in the first bioreactor: 28 °C.
- Ethanol concentration during loading of the second bioreactor: 4.5 % (v/v).
- Temperature in the second bioreactor: 28 °C.

Figures S2.27 and S2.28 show the variation of the ethanol concentration, acidity, volume, and total and viable cells, in the first and second bioreactor, respectively. All values shown are the means of eight replications with their standard deviations.

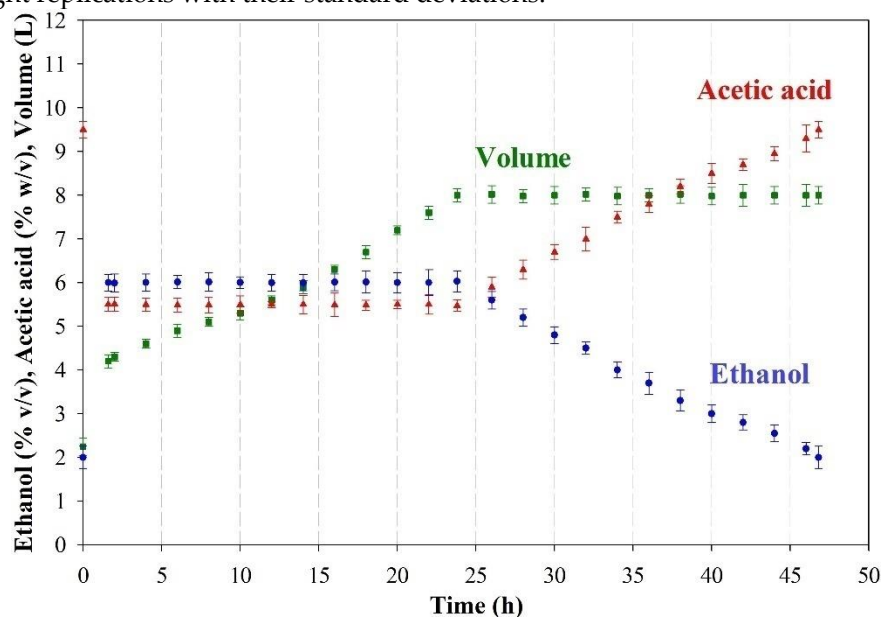

**Figure S2.27.** Time course of the ethanol concentration, acidity and volume of medium in the first bioreactor in Experiment 14.

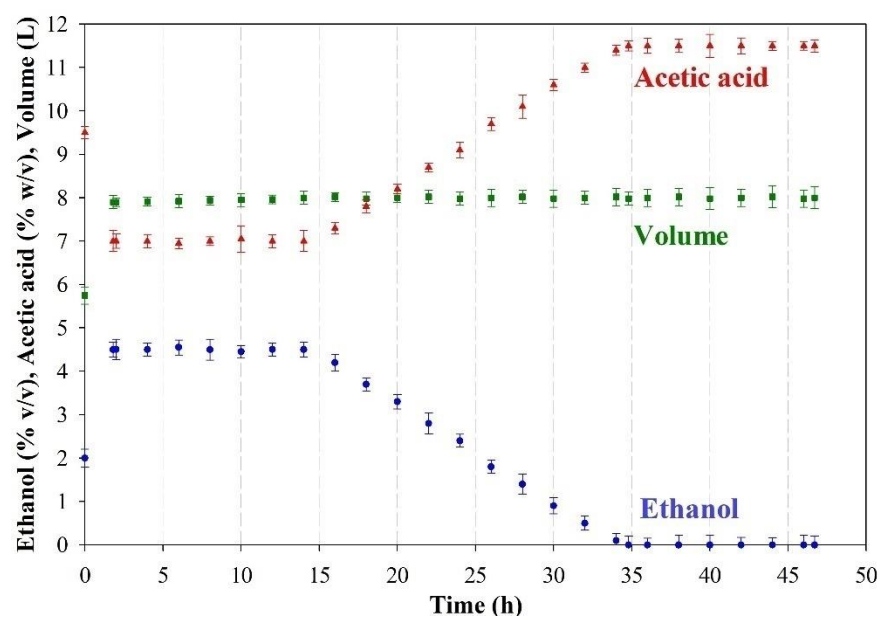

**Figure S2.28.** Time course of the ethanol concentration, acidity and volume of medium in the second bioreactor in Experiment 14.

The procedure used to obtain the different variables is described in detail in Supplementary Material 1. By way of summary, Table S2.15 shows the values for Experiment 14.

**Table S2.15.** Experimental results obtained in Experiment 14

| Variable                                                       | Value      |
|----------------------------------------------------------------|------------|
| Total cycle duration (h)                                       | 46.8 ± 1.1 |
| Duration of the fast loading stage in the first bioreactor (h) | 1.6 ± 0.1  |
| Duration of the slow loading stage in the first bioreactor (h) | 22.2 ± 0.9 |
| Duration of the depletion stage in the first bioreactor (h)    | 23.0 ± 1.4 |

|                                                                                                         |               |
|---------------------------------------------------------------------------------------------------------|---------------|
| Duration of the fast loading stage in the second bioreactor (h)                                         | 1.8 ± 0.2     |
| Duration of the slow loading stage in the second bioreactor (h)                                         | 12.2 ± 0.4    |
| Duration of the depletion stage in the second bioreactor (h)                                            | 20.8 ± 0.8    |
| Duration of starving in stage the second bioreactor (h)                                                 | 11.9 ± 1.1    |
| Time fraction of the fast loading stage in the first bioreactor over the cycle duration                 | 0.034 ± 0.002 |
| Time fraction of the slow loading stage in the first bioreactor over the cycle duration                 | 0.474 ± 0.022 |
| Time fraction of the depletion stage in the first bioreactor over the cycle duration                    | 0.491 ± 0.032 |
| Time fraction of the fast loading stage in the second bioreactor over the cycle duration                | 0.039 ± 0.004 |
| Time fraction of the slow loading stage in the second bioreactor over the cycle duration                | 0.261 ± 0.009 |
| Time fraction of the depletion stage in the second bioreactor over the cycle duration                   | 0.445 ± 0.018 |
| Time fraction of the starving stage in the second bioreactor over the cycle duration                    | 0.255 ± 0.023 |
| Mean volume in the fast loading stage in the first bioreactor (L)                                       | 3.23 ± 0.05   |
| Mean volume in the slow loading stage in the first bioreactor (L)                                       | 6.10 ± 0.05   |
| Mean volume in the depletion stage in the first bioreactor (L)                                          | 8.00 ± 0.05   |
| Mean volume in the first bioreactor (L)                                                                 | 6.94 ± 0.29   |
| Mean volume in the fast loading stage in the second bioreactor (L)                                      | 6.83 ± 0.05   |
| Mean volume in the slow loading stage in the second bioreactor (L)                                      | 7.95 ± 0.05   |
| Mean volume in the depletion stage in the second bioreactor (L)                                         | 8.00 ± 0.05   |
| Mean volume in the starving stage in the second bioreactor (L)                                          | 8.00 ± 0.05   |
| Mean volume in the second bioreactor (L)                                                                | 7.94 ± 0.26   |
| Mean overall volume during a cycle in the two bioreactors as a whole (L)                                | 14.88 ± 0.39  |
| Volume of fermentation medium unloaded from the second reactor (L)                                      | 8.00 ± 0.05   |
| Final ethanol concentration at the time the second bioreactor was unloaded (% v/v)                      | 0.0 ± 0.2     |
| Mean ethanol concentration in the first bioreactor (% v/v)                                              | 4.8 ± 0.3     |
| Mean ethanol concentration in the second bioreactor (% v/v)                                             | 3.0 ± 0.4     |
| Final acetic acid concentration at the time the first bioreactor was unloaded (% w/v)                   | 9.5 ± 0.2     |
| Final acetic acid concentration at the time the second bioreactor was unloaded (% w/v)                  | 11.5 ± 0.2    |
| Mean acetic acid concentration in the first bioreactor (% w/v)                                          | 6.7 ± 0.3     |
| Mean acetic acid concentration in the second bioreactor (% w/v)                                         | 8.5 ± 0.4     |
| Mean rate of acetic acid formation in the first bioreactor (% w/v · h <sup>-1</sup> )                   | 0.17 ± 0.01   |
| Mean rate of acetic acid formation in second bioreactor (% w/v · h <sup>-1</sup> )                      | 0.10 ± 0.01   |
| Mean overall rate of acetic acid formation in the two bioreactors as a whole (% w/v · h <sup>-1</sup> ) | 0.13 ± 0.01   |
| Total acetic acid production in the first bioreactor (g acetic acid · h <sup>-1</sup> )                 | 11.7 ± 0.4    |
| Total acetic acid production in the second bioreactor (g acetic acid · h <sup>-1</sup> )                | 8.0 ± 0.4     |
| Total acetic acid production in the two bioreactors as a whole (g acetic acid · h <sup>-1</sup> )       | 19.7 ± 0.6    |

## S2.15. Results of Experiment 15

The operating conditions used in this experiment were as follows:

- Volume unloaded from the first bioreactor: 4.25 L.
- Total ethanol concentration at the time the first bioreactor was unloaded: 4.0 % (v/v).
- Ethanol concentration during loading of the first bioreactor: 6.0 % (v/v).

- Temperature in the first bioreactor: 28 °C.
- Ethanol concentration during loading of the second bioreactor: 4.5 % (v/v).
- Temperature in the second bioreactor: 28 °C.

Figures S2.29 and S2.30 show the variation of the ethanol concentration, acidity, volume, and total and viable cells, in the first and second bioreactor, respectively. All values shown are the means of eight replications with their standard deviations.

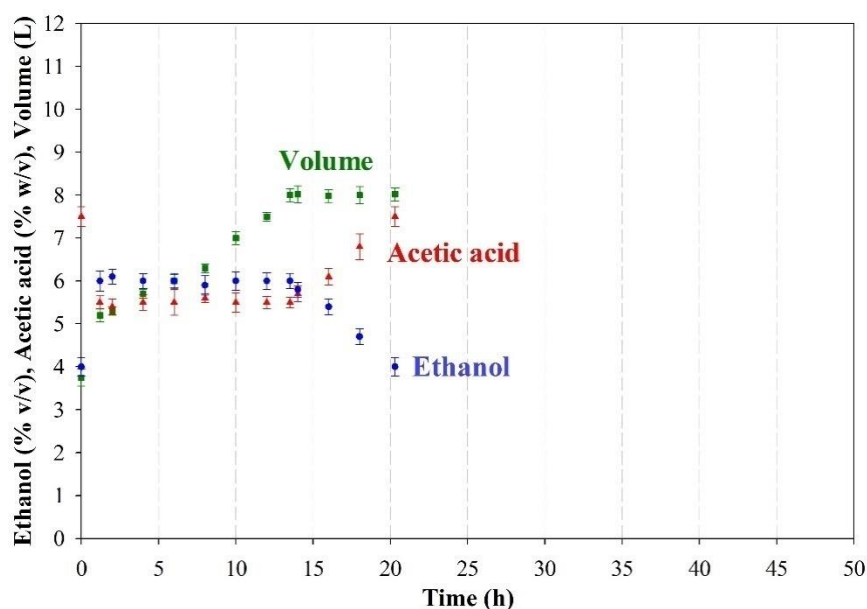

**Figure S2.29.** Time course of the ethanol concentration, acidity and volume of medium in the first bioreactor in Experiment 15.

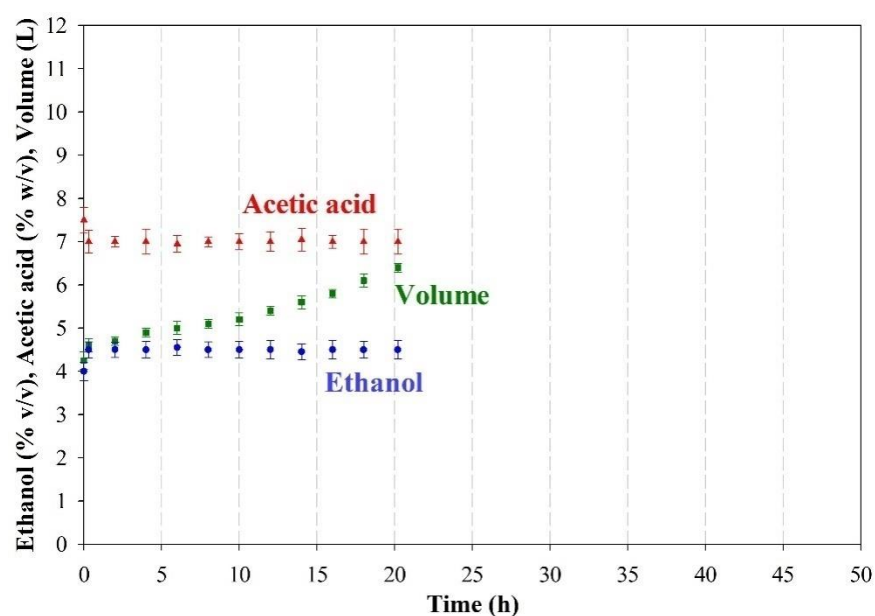

**Figure S2.30.** Time course of the ethanol concentration, acidity and volume of medium in the second bioreactor in Experiment 15.

The procedure used to obtain the different variables is described in detail in Supplementary Material 1. By way of summary, Table S2.16 shows the values for Experiment 15.

**Table S2.16.** Experimental results obtained in Experiment 15



| Variable                                                                                 | Value             |
|------------------------------------------------------------------------------------------|-------------------|
| Total cycle duration (h)                                                                 | $20.3 \pm 0.6$    |
| Duration of the fast loading stage in the first bioreactor (h)                           | $1.2 \pm 0.1$     |
| Duration of the slow loading stage in the first bioreactor (h)                           | $12.3 \pm 0.4$    |
| Duration of the depletion stage in the first bioreactor (h)                              | $6.8 \pm 0.7$     |
| Duration of the fast loading stage in the second bioreactor (h)                          | $0.3 \pm 0.1$     |
| Duration of the slow loading stage in the second bioreactor (h)                          | $19.9 \pm 0.5$    |
| Time fraction of the fast loading stage in the first bioreactor over the cycle duration  | $0.059 \pm 0.005$ |
| Time fraction of the slow loading stage in the first bioreactor over the cycle duration  | $0.606 \pm 0.027$ |
| Time fraction of the depletion stage in the first bioreactor over the cycle duration     | $0.335 \pm 0.037$ |
| Time fraction of the fast loading stage in the second bioreactor over the cycle duration | $0.015 \pm 0.005$ |
| Time fraction of the slow loading stage in the second bioreactor over the cycle duration | $0.985 \pm 0.035$ |
| Mean volume in the fast loading stage in the first bioreactor (L)                        | $4.48 \pm 0.05$   |
| Mean volume in the slow loading stage in the first bioreactor (L)                        | $6.60 \pm 0.05$   |
| Mean volume in the depletion stage in the first bioreactor (L)                           | $8.00 \pm 0.05$   |
| Mean volume in the first bioreactor (L)                                                  | $6.94 \pm 0.35$   |
| Mean volume in the fast loading stage in the second bioreactor (L)                       | $4.43 \pm 0.05$   |
| Mean volume in the slow loading stage in the second bioreactor (L)                       | $5.5 \pm 0.05$    |
| Mean volume in the second bioreactor (L)                                                 | $5.48 \pm 0.22$   |
| Mean overall volume during a cycle in the two bioreactors as a whole (L)                 | $12.43 \pm 0.41$  |
| Volume of fermentation medium unloaded from the second reactor (L)                       | $6.40 \pm 0.05$   |
| Final ethanol concentration at the time the second bioreactor was unloaded (% v/v)       | $4.5 \pm 0.2$     |
| Mean ethanol concentration in the first bioreactor (% v/v)                               | $5.5 \pm 0.2$     |
| Mean ethanol concentration in the second bioreactor (% v/v)                              | $4.5 \pm 0.2$     |
| Final acetic acid concentration at the time the first bioreactor was unloaded (% w/v)    | $7.5 \pm 0.2$     |
| Final acetic acid concentration at the time the second bioreactor was unloaded (% w/v)   | $7.0 \pm 0.2$     |
| Mean acetic acid concentration in the first bioreactor (% w/v)                           | $6.0 \pm 0.2$     |
| Mean acetic acid concentration in the second bioreactor (% w/v)                          | $7.0 \pm 0.2$     |

---

|                                                                                                        |             |
|--------------------------------------------------------------------------------------------------------|-------------|
| Mean rate of acetic acid formation in the first bioreactor (% w/v ·h <sup>-1</sup> )                   | 0.23 ± 0.01 |
| Mean rate of acetic acid formation in second bioreactor (% w/v ·h <sup>-1</sup> )                      | 0.12 ± 0.01 |
| Mean overall rate of acetic acid formation in the two bioreactors as a whole (% w/v ·h <sup>-1</sup> ) | 0.18 ± 0.01 |
| Total acetic acid production in the first bioreactor (g acetic acid·h <sup>-1</sup> )                  | 15.7 ± 0.6  |
| Total acetic acid production in the second bioreactor (g acetic acid·h <sup>-1</sup> )                 | 6.4 ± 0.8   |
| Total acetic acid production in the two bioreactors as a whole (g acetic acid·h <sup>-1</sup> )        | 22.1 ± 0.9  |

---

## S2.16. Results of Experiment 16

The operating conditions used in this experiment were as follows:

- Volume unloaded from the first bioreactor: 5.75 L.
- Total ethanol concentration at the time the first bioreactor was unloaded: 4.0 % (v/v).
- Ethanol concentration during loading of the first bioreactor: 6.0 % (v/v).
- Temperature in the first bioreactor: 32 °C.
- Ethanol concentration during loading of the second bioreactor: 4.5 % (v/v).
- Temperature in the second bioreactor: 32 °C.

Figures S2.31 and S2.32 show the variation of the ethanol concentration, acidity, volume, and total and viable cells, in the first and second bioreactor, respectively. All values shown are the means of eight replications with their standard deviations.

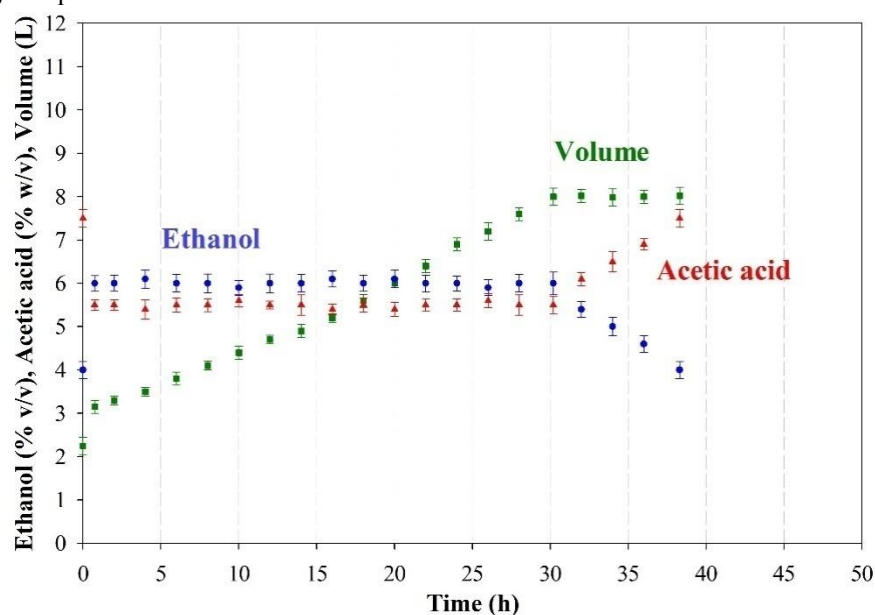

**Figure S2.31.** Time course of the ethanol concentration, acidity and volume of medium in the first bioreactor in Experiment 16.

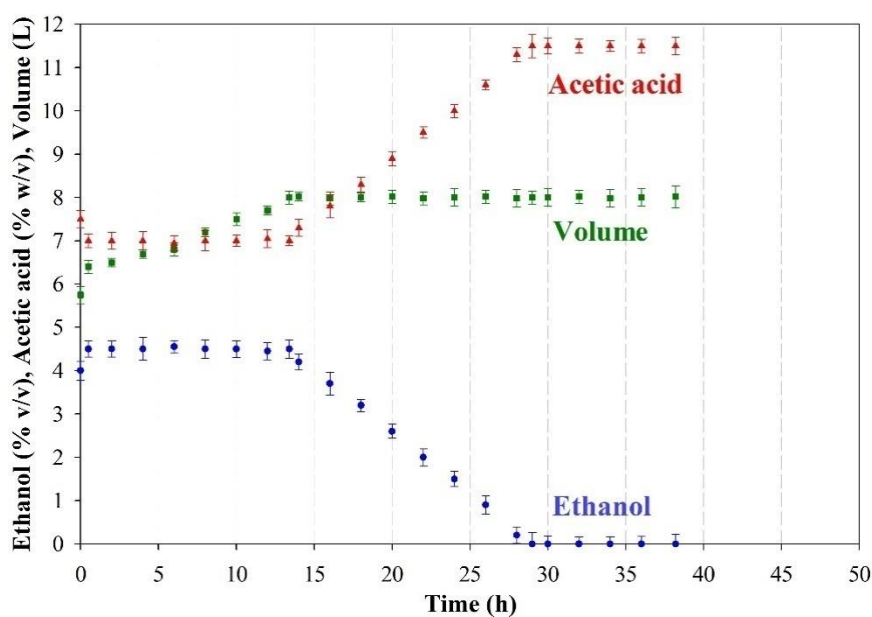

**Figure S2.32.** Time course of the ethanol concentration, acidity and volume of medium in the second bioreactor in Experiment 16.

The procedure used to obtain the different variables is described in detail in Supplementary Material 1. By way of summary, Table S2.17 shows the values for Experiment 16.

**Table S2.17.** Experimental results obtained in Experiment 16

| Variable                                                                                                | Value         |
|---------------------------------------------------------------------------------------------------------|---------------|
| Total cycle duration (h)                                                                                | 38.3 ± 0.6    |
| Duration of the fast loading stage in the first bioreactor (h)                                          | 0.8 ± 0.1     |
| Duration of the slow loading stage in the first bioreactor (h)                                          | 29.5 ± 0.4    |
| Duration of the depletion stage in the first bioreactor (h)                                             | 8.1 ± 0.7     |
| Duration of the fast loading stage in the second bioreactor (h)                                         | 0.5 ± 0.1     |
| Duration of the slow loading stage in the second bioreactor (h)                                         | 12.9 ± 0.3    |
| Duration of the depletion stage in the second bioreactor (h)                                            | 15.6 ± 0.6    |
| Duration of starving in stage the second bioreactor (h)                                                 | 9.2 ± 0.8     |
| Time fraction of the fast loading stage in the first bioreactor over the cycle duration                 | 0.020 ± 0.003 |
| Time fraction of the slow loading stage in the first bioreactor over the cycle duration                 | 0.769 ± 0.016 |
| Time fraction of the depletion stage in the first bioreactor over the cycle duration                    | 0.211 ± 0.019 |
| Time fraction of the fast loading stage in the second bioreactor over the cycle duration                | 0.013 ± 0.003 |
| Time fraction of the slow loading stage in the second bioreactor over the cycle duration                | 0.338 ± 0.010 |
| Time fraction of the depletion stage in the second bioreactor over the cycle duration                   | 0.408 ± 0.017 |
| Time fraction of the starving stage in the second bioreactor over the cycle duration                    | 0.241 ± 0.021 |
| Mean volume in the fast loading stage in the first bioreactor (L)                                       | 2.70 ± 0.05   |
| Mean volume in the slow loading stage in the first bioreactor (L)                                       | 5.58 ± 0.05   |
| Mean volume in the depletion stage in the first bioreactor (L)                                          | 8.00 ± 0.05   |
| Mean volume in the first bioreactor (L)                                                                 | 6.03 ± 0.18   |
| Mean volume in the fast loading stage in the second bioreactor (L)                                      | 6.08 ± 0.05   |
| Mean volume in the slow loading stage in the second bioreactor (L)                                      | 7.20 ± 0.05   |
| Mean volume in the depletion stage in the second bioreactor (L)                                         | 8.00 ± 0.05   |
| Mean volume in the starving stage in the second bioreactor (L)                                          | 8.00 ± 0.05   |
| Mean volume in the second bioreactor (L)                                                                | 7.70 ± 0.24   |
| Mean overall volume during a cycle in the two bioreactors as a whole (L)                                | 13.74 ± 0.30  |
| Volume of fermentation medium unloaded from the second reactor (L)                                      | 8.00 ± 0.05   |
| Final ethanol concentration at the time the second bioreactor was unloaded (% v/v)                      | 0.0 ± 0.2     |
| Mean ethanol concentration in the first bioreactor (% v/v)                                              | 5.7 ± 0.1     |
| Mean ethanol concentration in the second bioreactor (% v/v)                                             | 3.2 ± 0.4     |
| Final acetic acid concentration at the time the first bioreactor was unloaded (% w/v)                   | 7.5 ± 0.2     |
| Final acetic acid concentration at the time the second bioreactor was unloaded (% w/v)                  | 11.5 ± 0.2    |
| Mean acetic acid concentration in the first bioreactor (% w/v)                                          | 5.8 ± 0.1     |
| Mean acetic acid concentration in the second bioreactor (% w/v)                                         | 8.2 ± 0.4     |
| Mean rate of acetic acid formation in the first bioreactor (% w/v · h <sup>-1</sup> )                   | 0.19 ± 0.01   |
| Mean rate of acetic acid formation in second bioreactor (% w/v · h <sup>-1</sup> )                      | 0.17 ± 0.01   |
| Mean overall rate of acetic acid formation in the two bioreactors as a whole (% w/v · h <sup>-1</sup> ) | 0.17 ± 0.01   |
| Total acetic acid production in the first bioreactor (g acetic acid · h <sup>-1</sup> )                 | 11.3 ± 0.3    |

|                                                                                                 |            |
|-------------------------------------------------------------------------------------------------|------------|
| Total acetic acid production in the second bioreactor (g acetic acid·h <sup>-1</sup> )          | 12.8 ± 0.6 |
| Total acetic acid production in the two bioreactors as a whole (g acetic acid·h <sup>-1</sup> ) | 24.0 ± 0.6 |

### S2.17. Results of Experiment 17

The operating conditions used in this experiment were as follows:

- Volume unloaded from the first bioreactor: 5.00 L.
- Total ethanol concentration at the time the first bioreactor was unloaded: 3.0 % (v/v).
- Ethanol concentration during loading of the first bioreactor: 5.0 % (v/v).
- Temperature in the first bioreactor: 30 °C.
- Ethanol concentration during loading of the second bioreactor: 3.5 % (v/v).
- Temperature in the second bioreactor: 30 °C.

Figures S2.33 and S2.34 show the variation of the ethanol concentration, acidity, volume, and total and viable cells, in the first and second bioreactor, respectively. All values shown are the means of nine replications with their standard deviations.

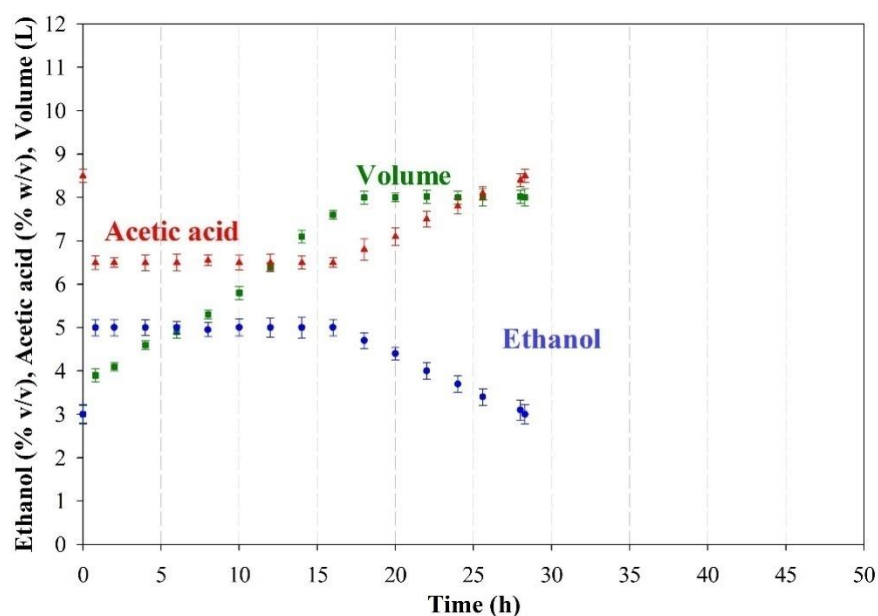

**Figure S2.33.** Time course of the ethanol concentration, acidity and volume of medium in the first bioreactor in Experiment 17.

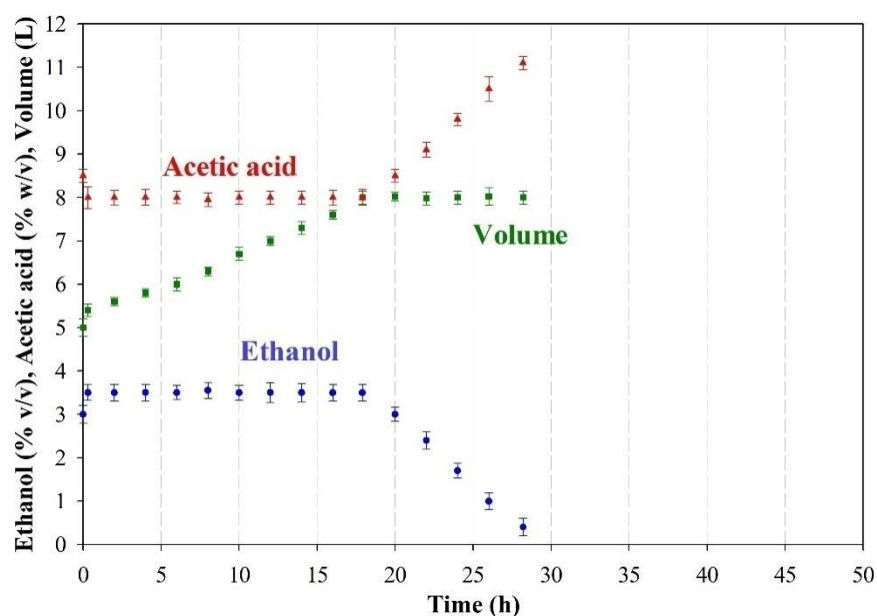

**Figure S2.34.** Time course of the ethanol concentration, acidity and volume of medium in the second bioreactor in Experiment 17.

The procedure used to obtain the different variables is described in detail in Supplementary Material 1. By way of summary, Table S2.18 shows the values for Experiment 17.

**Table S2.18.** Experimental results obtained in Experiment 17

| Variable                                                                                 | Value             |
|------------------------------------------------------------------------------------------|-------------------|
| Total cycle duration (h)                                                                 | $28.3 \pm 0.7$    |
| Duration of the fast loading stage in the first bioreactor (h)                           | $0.8 \pm 0.1$     |
| Duration of the slow loading stage in the first bioreactor (h)                           | $15.2 \pm 0.3$    |
| Duration of the depletion stage in the first bioreactor (h)                              | $12.3 \pm 0.8$    |
| Duration of the fast loading stage in the second bioreactor (h)                          | $0.3 \pm 0.1$     |
| Duration of the slow loading stage in the second bioreactor (h)                          | $17.6 \pm 0.3$    |
| Duration of the depletion stage in the second bioreactor (h)                             | $10.3 \pm 0.7$    |
| Time fraction of the fast loading stage in the first bioreactor over the cycle duration  | $0.028 \pm 0.004$ |
| Time fraction of the slow loading stage in the first bioreactor over the cycle duration  | $0.537 \pm 0.017$ |
| Time fraction of the depletion stage in the first bioreactor over the cycle duration     | $0.435 \pm 0.029$ |
| Time fraction of the fast loading stage in the second bioreactor over the cycle duration | $0.011 \pm 0.004$ |
| Time fraction of the slow loading stage in the second bioreactor over the cycle duration | $0.624 \pm 0.017$ |
| Time fraction of the depletion stage in the second bioreactor over the cycle duration    | $0.365 \pm 0.025$ |
| Mean volume in the fast loading stage in the first bioreactor (L)                        | $3.45 \pm 0.05$   |

|                                                                                                         |                  |
|---------------------------------------------------------------------------------------------------------|------------------|
| Mean volume in the slow loading stage in the first bioreactor (L)                                       | $5.95 \pm 0.05$  |
| Mean volume in the depletion stage in the first bioreactor (L)                                          | $8.00 \pm 0.05$  |
| Mean volume in the first bioreactor (L)                                                                 | $6.77 \pm 0.25$  |
| Mean volume in the fast loading stage in the second bioreactor (L)                                      | $5.20 \pm 0.05$  |
| Mean volume in the slow loading stage in the second bioreactor (L)                                      | $6.70 \pm 0.05$  |
| Mean volume in the depletion stage in the second bioreactor (L)                                         | $8.00 \pm 0.05$  |
| Mean volume in the second bioreactor (L)                                                                | $7.16 \pm 0.25$  |
| Mean overall volume during a cycle in the two bioreactors as a whole (L)                                | $13.93 \pm 0.35$ |
| Volume of fermentation medium unloaded from the second reactor (L)                                      | $8.00 \pm 0.05$  |
| Final ethanol concentration at the time the second bioreactor was unloaded (% v/v)                      | $0.4 \pm 0.2$    |
| Mean ethanol concentration in the first bioreactor (% v/v)                                              | $4.7 \pm 0.2$    |
| Mean ethanol concentration in the second bioreactor (% v/v)                                             | $2.9 \pm 0.3$    |
| Final acetic acid concentration at the time the first bioreactor was unloaded (% w/v)                   | $8.5 \pm 0.2$    |
| Final acetic acid concentration at the time the second bioreactor was unloaded (% w/v)                  | $11.1 \pm 0.2$   |
| Mean acetic acid concentration in the first bioreactor (% w/v)                                          | $6.8 \pm 0.2$    |
| Mean acetic acid concentration in the second bioreactor (% w/v)                                         | $8.6 \pm 0.3$    |
| Mean rate of acetic acid formation in the first bioreactor (% w/v · h <sup>-1</sup> )                   | $0.22 \pm 0.01$  |
| Mean rate of acetic acid formation in second bioreactor (% w/v · h <sup>-1</sup> )                      | $0.23 \pm 0.01$  |
| Mean overall rate of acetic acid formation in the two bioreactors as a whole (% w/v · h <sup>-1</sup> ) | $0.23 \pm 0.01$  |
| Total acetic acid production in the first bioreactor (g acetic acid · h <sup>-1</sup> )                 | $15.0 \pm 0.5$   |
| Total acetic acid production in the second bioreactor (g acetic acid · h <sup>-1</sup> )                | $16.4 \pm 0.8$   |
| Total acetic acid production in the two bioreactors as a whole (g acetic acid · h <sup>-1</sup> )       | $31.4 \pm 1.0$   |

## S2.18. Results of Experiment 18

The operating conditions used in this experiment were as follows:

- Volume unloaded from the first bioreactor: 5.00 L.
- Total ethanol concentration at the time the first bioreactor was unloaded: 3.0 % (v/v).
- Ethanol concentration during loading of the first bioreactor: 5.0 % (v/v).
- Temperature in the first bioreactor: 30 °C.
- Ethanol concentration during loading of the second bioreactor: 3.5 % (v/v).

- Temperature in the second bioreactor: 30 °C.

Figures S2.35 and S2.36 show the variation of the ethanol concentration, acidity, volume, and total and viable cells, in the first and second bioreactor, respectively. All values shown are the means of nineteen replications with their standard deviations.

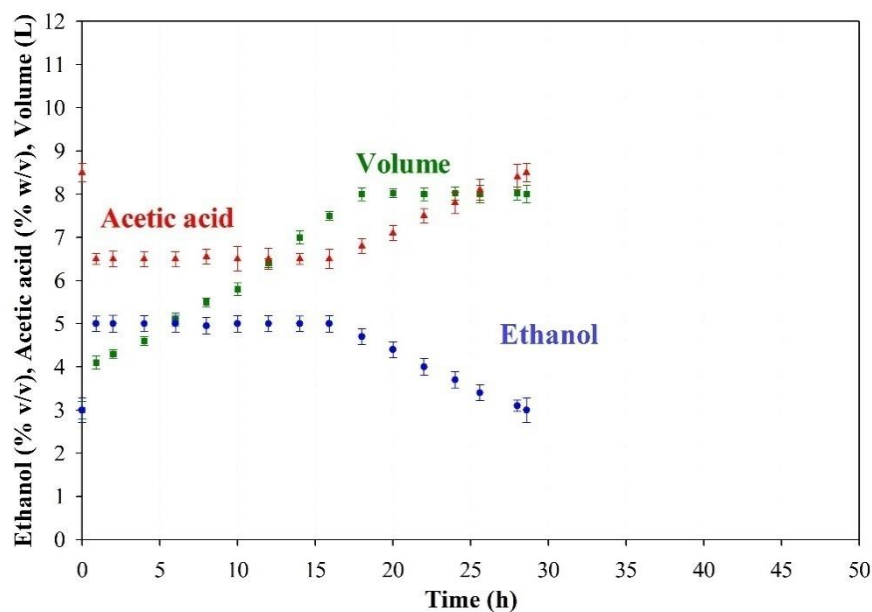

**Figure S2.35.** Time course of the ethanol concentration, acidity and volume of medium in the first bioreactor in Experiment 18.

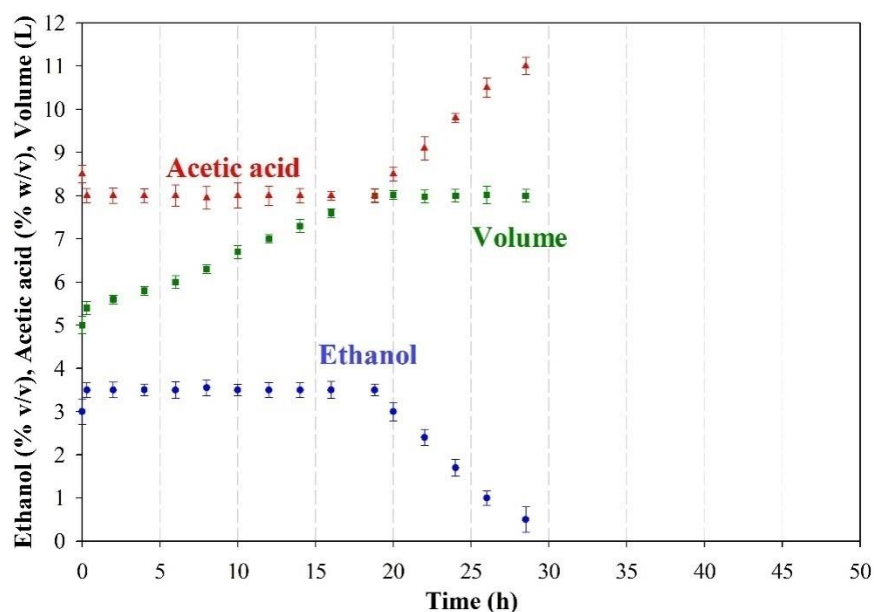

**Figure S2.36.** Time course of the ethanol concentration, acidity and volume of medium in the second bioreactor in Experiment 18.

The procedure used to obtain the different variables is described in detail in Supplementary Material 1. By way of summary, Table S2.19 shows the values for Experiment 18.

**Table S2.19.** Experimental results obtained in Experiment 18

| Variable                 | Value      |
|--------------------------|------------|
| Total cycle duration (h) | 28.6 ± 0.8 |



|                                                                                                         |               |
|---------------------------------------------------------------------------------------------------------|---------------|
| Duration of the fast loading stage in the first bioreactor (h)                                          | 0.9 ± 0.1     |
| Duration of the slow loading stage in the first bioreactor (h)                                          | 15.0 ± 0.2    |
| Duration of the depletion stage in the first bioreactor (h)                                             | 12.7 ± 0.8    |
| Duration of the fast loading stage in the second bioreactor (h)                                         | 0.3 ± 0.1     |
| Duration of the slow loading stage in the second bioreactor (h)                                         | 18.5 ± 0.4    |
| Duration of the depletion stage in the second bioreactor (h)                                            | 9.7 ± 0.9     |
| Time fraction of the fast loading stage in the first bioreactor over the cycle duration                 | 0.031 ± 0.004 |
| Time fraction of the slow loading stage in the first bioreactor over the cycle duration                 | 0.524 ± 0.017 |
| Time fraction of the depletion stage in the first bioreactor over the cycle duration                    | 0.444 ± 0.031 |
| Time fraction of the fast loading stage in the second bioreactor over the cycle duration                | 0.011 ± 0.004 |
| Time fraction of the slow loading stage in the second bioreactor over the cycle duration                | 0.649 ± 0.023 |
| Time fraction of the depletion stage in the second bioreactor over the cycle duration                   | 0.340 ± 0.033 |
| Mean volume in the fast loading stage in the first bioreactor (L)                                       | 3.55 ± 0.05   |
| Mean volume in the slow loading stage in the first bioreactor (L)                                       | 6.05 ± 0.05   |
| Mean volume in the depletion stage in the first bioreactor (L)                                          | 8.00 ± 0.05   |
| Mean volume in the first bioreactor (L)                                                                 | 6.84 ± 0.27   |
| Mean volume in the fast loading stage in the second bioreactor (L)                                      | 5.20 ± 0.05   |
| Mean volume in the slow loading stage in the second bioreactor (L)                                      | 6.70 ± 0.05   |
| Mean volume in the depletion stage in the second bioreactor (L)                                         | 8.00 ± 0.05   |
| Mean volume in the second bioreactor (L)                                                                | 7.13 ± 0.32   |
| Mean overall volume during a cycle in the two bioreactors as a whole (L)                                | 13.96 ± 0.42  |
| Volume of fermentation medium unloaded from the second reactor (L)                                      | 8.00 ± 0.05   |
| Final ethanol concentration at the time the second bioreactor was unloaded (% v/v)                      | 0.5 ± 0.2     |
| Mean ethanol concentration in the first bioreactor (% v/v)                                              | 4.7 ± 0.2     |
| Mean ethanol concentration in the second bioreactor (% v/v)                                             | 2.9 ± 0.2     |
| Final acetic acid concentration at the time the first bioreactor was unloaded (% w/v)                   | 8.5 ± 0.2     |
| Final acetic acid concentration at the time the second bioreactor was unloaded (% w/v)                  | 11.0 ± 0.2    |
| Mean acetic acid concentration in the first bioreactor (% w/v)                                          | 6.8 ± 0.2     |
| Mean acetic acid concentration in the second bioreactor (% w/v)                                         | 8.6 ± 0.2     |
| Mean rate of acetic acid formation in the first bioreactor (% w/v · h <sup>-1</sup> )                   | 0.22 ± 0.01   |
| Mean rate of acetic acid formation in second bioreactor (% w/v · h <sup>-1</sup> )                      | 0.22 ± 0.01   |
| Mean overall rate of acetic acid formation in the two bioreactors as a whole (% w/v · h <sup>-1</sup> ) | 0.22 ± 0.01   |
| Total acetic acid production in the first bioreactor (g acetic acid · h <sup>-1</sup> )                 | 14.9 ± 0.5    |
| Total acetic acid production in the second bioreactor (g acetic acid · h <sup>-1</sup> )                | 16.0 ± 0.8    |
| Total acetic acid production in the two bioreactors as a whole (g acetic acid · h <sup>-1</sup> )       | 30.8 ± 1.0    |

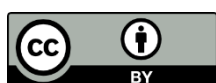

Supplement: s1 [file s1]
