# Supplementary material
Source: MDPI journal article supplement (https://www.mdpi.com/2076-3417/10/24/9064)
Supplement: s1 [file s1]

Archive with 5 entries (5 files):
- Get_feasible_combinations.m
- Results.xlsx
- S1_v3.pdf
- S2_v2.pdf
- S3_v2.pdf
