# Supplementary material
Source: MDPI journal article supplement (https://www.mdpi.com/2076-3417/10/24/9064)
Supplement: s1 [file s1 › Results.xlsx]

## Sheet: Pass 1
Vd1					Ed1					Ec1					Ec2
(-2)	(+2)	(-1)	(+1)	(0)	(-2)	(+2)	(-1)	(+1)	(0)	(-2)	(+2)	(-1)	(+1)	(0)	(-2)	(+2)	(-1)	(+1)	(0)
3.5	6.5	4.25	5.75	5	1	5	2	4	3	4.5	5.5	4.75	5.25	5	1	2	1.25	1.75	1.5
3.5	6.5	4.25	5.75	5	1	5	2	4	3	4.5	5.5	4.75	5.25	5	1.5	2.5	1.75	2.25	2
3.5	6.5	4.25	5.75	5	1	5	2	4	3	4.5	5.5	4.75	5.25	5	1	3	1.5	2.5	2
3.5	6.5	4.25	5.75	5	1	5	2	4	3	4.5	5.5	4.75	5.25	5	2	3	2.25	2.75	2.5
3.5	6.5	4.25	5.75	5	1	5	2	4	3	4.5	5.5	4.75	5.25	5	1.5	3.5	2	3	2.5
3.5	6.5	4.25	5.75	5	1	5	2	4	3	4.5	5.5	4.75	5.25	5	1	4	1.75	3.25	2.5
3.5	6.5	4.25	5.75	5	1	5	2	4	3	4.5	5.5	4.75	5.25	5	2.5	3.5	2.75	3.25	3
3.5	6.5	4.25	5.75	5	1	5	2	4	3	4.5	5.5	4.75	5.25	5	2	4	2.5	3.5	3
3.5	6.5	4.25	5.75	5	1	5	2	4	3	4.5	5.5	4.75	5.25	5	1.5	4.5	2.25	3.75	3
3.5	6.5	4.25	5.75	5	1	5	2	4	3	4.5	5.5	4.75	5.25	5	1	5	2	4	3
3.5	6.5	4.25	5.75	5	1	5	2	4	3	4.5	5.5	4.75	5.25	5	3	4	3.25	3.75	3.5
3.5	6.5	4.25	5.75	5	1	5	2	4	3	4.5	5.5	4.75	5.25	5	2.5	4.5	3	4	3.5
3.5	6.5	4.25	5.75	5	1	5	2	4	3	4.5	5.5	4.75	5.25	5	2	5	2.75	4.25	3.5
3.5	6.5	4.25	5.75	5	1	5	2	4	3	4.5	5.5	4.75	5.25	5	1.5	5.5	2.5	4.5	3.5
3.5	6.5	4.25	5.75	5	1	5	2	4	3	4.5	5.5	4.75	5.25	5	1	6	2.25	4.75	3.5
3.5	6.5	4.25	5.75	5	1	5	2	4	3	4.5	5.5	4.75	5.25	5	3.5	4.5	3.75	4.25	4
3.5	6.5	4.25	5.75	5	1	5	2	4	3	4.5	5.5	4.75	5.25	5	3	5	3.5	4.5	4
3.5	6.5	4.25	5.75	5	1	5	2	4	3	4.5	5.5	4.75	5.25	5	2.5	5.5	3.25	4.75	4
3.5	6.5	4.25	5.75	5	1	5	2	4	3	4.5	5.5	4.75	5.25	5	4	5	4.25	4.75	4.5
3.5	6.5	4.25	5.75	5	1	5	2	4	3	4	6	4.5	5.5	5	1	2	1.25	1.75	1.5
3.5	6.5	4.25	5.75	5	1	5	2	4	3	4	6	4.5	5.5	5	1.5	2.5	1.75	2.25	2
3.5	6.5	4.25	5.75	5	1	5	2	4	3	4	6	4.5	5.5	5	1	3	1.5	2.5	2
3.5	6.5	4.25	5.75	5	1	5	2	4	3	4	6	4.5	5.5	5	2	3	2.25	2.75	2.5
3.5	6.5	4.25	5.75	5	1	5	2	4	3	4	6	4.5	5.5	5	1.5	3.5	2	3	2.5
3.5	6.5	4.25	5.75	5	1	5	2	4	3	4	6	4.5	5.5	5	1	4	1.75	3.25	2.5
3.5	6.5	4.25	5.75	5	1	5	2	4	3	4	6	4.5	5.5	5	2.5	3.5	2.75	3.25	3
3.5	6.5	4.25	5.75	5	1	5	2	4	3	4	6	4.5	5.5	5	2	4	2.5	3.5	3
3.5	6.5	4.25	5.75	5	1	5	2	4	3	4	6	4.5	5.5	5	1.5	4.5	2.25	3.75	3
3.5	6.5	4.25	5.75	5	1	5	2	4	3	4	6	4.5	5.5	5	1	5	2	4	3
3.5	6.5	4.25	5.75	5	1	5	2	4	3	4	6	4.5	5.5	5	3	4	3.25	3.75	3.5
3.5	6.5	4.25	5.75	5	1	5	2	4	3	4	6	4.5	5.5	5	2.5	4.5	3	4	3.5
3.5	6.5	4.25	5.75	5	1	5	2	4	3	4	6	4.5	5.5	5	2	5	2.75	4.25	3.5
3.5	6.5	4.25	5.75	5	1	5	2	4	3	4	6	4.5	5.5	5	1.5	5.5	2.5	4.5	3.5
3.5	6.5	4.25	5.75	5	1	5	2	4	3	4	6	4.5	5.5	5	1	6	2.25	4.75	3.5
3.5	6.5	4.25	5.75	5	1	5	2	4	3	4	6	4.5	5.5	5	3.5	4.5	3.75	4.25	4
3.5	6.5	4.25	5.75	5	1	5	2	4	3	4	6	4.5	5.5	5	3	5	3.5	4.5	4
3.5	6.5	4.25	5.75	5	1	5	2	4	3	4	6	4.5	5.5	5	2.5	5.5	3.25	4.75	4
3.5	6.5	4.25	5.75	5	1	5	2	4	3	4	6	4.5	5.5	5	4	5	4.25	4.75	4.5
3.5	6.5	4.25	5.75	5	1	5	2	4	3	3.5	6.5	4.25	5.75	5	1	2	1.25	1.75	1.5
3.5	6.5	4.25	5.75	5	1	5	2	4	3	3.5	6.5	4.25	5.75	5	1.5	2.5	1.75	2.25	2
3.5	6.5	4.25	5.75	5	1	5	2	4	3	3.5	6.5	4.25	5.75	5	1	3	1.5	2.5	2
3.5	6.5	4.25	5.75	5	1	5	2	4	3	3.5	6.5	4.25	5.75	5	2	3	2.25	2.75	2.5
3.5	6.5	4.25	5.75	5	1	5	2	4	3	3.5	6.5	4.25	5.75	5	1.5	3.5	2	3	2.5
3.5	6.5	4.25	5.75	5	1	5	2	4	3	3.5	6.5	4.25	5.75	5	1	4	1.75	3.25	2.5
3.5	6.5	4.25	5.75	5	1	5	2	4	3	3.5	6.5	4.25	5.75	5	2.5	3.5	2.75	3.25	3
3.5	6.5	4.25	5.75	5	1	5	2	4	3	3.5	6.5	4.25	5.75	5	2	4	2.5	3.5	3
3.5	6.5	4.25	5.75	5	1	5	2	4	3	3.5	6.5	4.25	5.75	5	1.5	4.5	2.25	3.75	3
3.5	6.5	4.25	5.75	5	1	5	2	4	3	3.5	6.5	4.25	5.75	5	1	5	2	4	3
3.5	6.5	4.25	5.75	5	1	5	2	4	3	3.5	6.5	4.25	5.75	5	3	4	3.25	3.75	3.5
3.5	6.5	4.25	5.75	5	1	5	2	4	3	3.5	6.5	4.25	5.75	5	2.5	4.5	3	4	3.5
3.5	6.5	4.25	5.75	5	1	5	2	4	3	3.5	6.5	4.25	5.75	5	2	5	2.75	4.25	3.5
3.5	6.5	4.25	5.75	5	1	5	2	4	3	3.5	6.5	4.25	5.75	5	1.5	5.5	2.5	4.5	3.5
3.5	6.5	4.25	5.75	5	1	5	2	4	3	3.5	6.5	4.25	5.75	5	1	6	2.25	4.75	3.5
3.5	6.5	4.25	5.75	5	1	5	2	4	3	3.5	6.5	4.25	5.75	5	3.5	4.5	3.75	4.25	4
3.5	6.5	4.25	5.75	5	1	5	2	4	3	3.5	6.5	4.25	5.75	5	3	5	3.5	4.5	4
3.5	6.5	4.25	5.75	5	1	5	2	4	3	3.5	6.5	4.25	5.75	5	2.5	5.5	3.25	4.75	4
3.5	6.5	4.25	5.75	5	1	5	2	4	3	3.5	6.5	4.25	5.75	5	4	5	4.25	4.75	4.5
3.5	6.5	4.25	5.75	5	1	5	2	4	3	3	7	4	6	5	1	2	1.25	1.75	1.5
3.5	6.5	4.25	5.75	5	1	5	2	4	3	3	7	4	6	5	1.5	2.5	1.75	2.25	2
3.5	6.5	4.25	5.75	5	1	5	2	4	3	3	7	4	6	5	1	3	1.5	2.5	2
3.5	6.5	4.25	5.75	5	1	5	2	4	3	3	7	4	6	5	2	3	2.25	2.75	2.5
3.5	6.5	4.25	5.75	5	1	5	2	4	3	3	7	4	6	5	1.5	3.5	2	3	2.5
3.5	6.5	4.25	5.75	5	1	5	2	4	3	3	7	4	6	5	1	4	1.75	3.25	2.5
3.5	6.5	4.25	5.75	5	1	5	2	4	3	3	7	4	6	5	2.5	3.5	2.75	3.25	3
3.5	6.5	4.25	5.75	5	1	5	2	4	3	3	7	4	6	5	2	4	2.5	3.5	3
3.5	6.5	4.25	5.75	5	1	5	2	4	3	3	7	4	6	5	1.5	4.5	2.25	3.75	3
3.5	6.5	4.25	5.75	5	1	5	2	4	3	3	7	4	6	5	1	5	2	4	3
3.5	6.5	4.25	5.75	5	1	5	2	4	3	3	7	4	6	5	3	4	3.25	3.75	3.5
3.5	6.5	4.25	5.75	5	1	5	2	4	3	3	7	4	6	5	2.5	4.5	3	4	3.5
3.5	6.5	4.25	5.75	5	1	5	2	4	3	3	7	4	6	5	2	5	2.75	4.25	3.5
3.5	6.5	4.25	5.75	5	1	5	2	4	3	3	7	4	6	5	1.5	5.5	2.5	4.5	3.5
3.5	6.5	4.25	5.75	5	1	5	2	4	3	3	7	4	6	5	1	6	2.25	4.75	3.5
3.5	6.5	4.25	5.75	5	1	5	2	4	3	3	7	4	6	5	3.5	4.5	3.75	4.25	4
3.5	6.5	4.25	5.75	5	1	5	2	4	3	3	7	4	6	5	3	5	3.5	4.5	4
3.5	6.5	4.25	5.75	5	1	5	2	4	3	3	7	4	6	5	2.5	5.5	3.25	4.75	4
3.5	6.5	4.25	5.75	5	1	5	2	4	3	3	7	4	6	5	4	5	4.25	4.75	4.5
3.5	6.5	4.25	5.75	5	1	5	2	4	3	5	6	5.25	5.75	5.5	1	2	1.25	1.75	1.5
3.5	6.5	4.25	5.75	5	1	5	2	4	3	5	6	5.25	5.75	5.5	1.5	2.5	1.75	2.25	2
3.5	6.5	4.25	5.75	5	1	5	2	4	3	5	6	5.25	5.75	5.5	1	3	1.5	2.5	2
3.5	6.5	4.25	5.75	5	1	5	2	4	3	5	6	5.25	5.75	5.5	2	3	2.25	2.75	2.5
3.5	6.5	4.25	5.75	5	1	5	2	4	3	5	6	5.25	5.75	5.5	1.5	3.5	2	3	2.5
3.5	6.5	4.25	5.75	5	1	5	2	4	3	5	6	5.25	5.75	5.5	1	4	1.75	3.25	2.5
3.5	6.5	4.25	5.75	5	1	5	2	4	3	5	6	5.25	5.75	5.5	2.5	3.5	2.75	3.25	3
3.5	6.5	4.25	5.75	5	1	5	2	4	3	5	6	5.25	5.75	5.5	2	4	2.5	3.5	3
3.5	6.5	4.25	5.75	5	1	5	2	4	3	5	6	5.25	5.75	5.5	1.5	4.5	2.25	3.75	3
3.5	6.5	4.25	5.75	5	1	5	2	4	3	5	6	5.25	5.75	5.5	1	5	2	4	3
3.5	6.5	4.25	5.75	5	1	5	2	4	3	5	6	5.25	5.75	5.5	3	4	3.25	3.75	3.5
3.5	6.5	4.25	5.75	5	1	5	2	4	3	5	6	5.25	5.75	5.5	2.5	4.5	3	4	3.5
3.5	6.5	4.25	5.75	5	1	5	2	4	3	5	6	5.25	5.75	5.5	2	5	2.75	4.25	3.5
3.5	6.5	4.25	5.75	5	1	5	2	4	3	5	6	5.25	5.75	5.5	1.5	5.5	2.5	4.5	3.5
3.5	6.5	4.25	5.75	5	1	5	2	4	3	5	6	5.25	5.75	5.5	1	6	2.25	4.75	3.5
3.5	6.5	4.25	5.75	5	1	5	2	4	3	5	6	5.25	5.75	5.5	3.5	4.5	3.75	4.25	4
3.5	6.5	4.25	5.75	5	1	5	2	4	3	5	6	5.25	5.75	5.5	3	5	3.5	4.5	4
3.5	6.5	4.25	5.75	5	1	5	2	4	3	5	6	5.25	5.75	5.5	2.5	5.5	3.25	4.75	4
3.5	6.5	4.25	5.75	5	1	5	2	4	3	5	6	5.25	5.75	5.5	4	5	4.25	4.75	4.5
3.5	6.5	4.25	5.75	5	1	5	2	4	3	4.5	6.5	5	6	5.5	1	2	1.25	1.75	1.5
3.5	6.5	4.25	5.75	5	1	5	2	4	3	4.5	6.5	5	6	5.5	1.5	2.5	1.75	2.25	2
3.5	6.5	4.25	5.75	5	1	5	2	4	3	4.5	6.5	5	6	5.5	1	3	1.5	2.5	2
3.5	6.5	4.25	5.75	5	1	5	2	4	3	4.5	6.5	5	6	5.5	2	3	2.25	2.75	2.5
3.5	6.5	4.25	5.75	5	1	5	2	4	3	4.5	6.5	5	6	5.5	1.5	3.5	2	3	2.5
3.5	6.5	4.25	5.75	5	1	5	2	4	3	4.5	6.5	5	6	5.5	1	4	1.75	3.25	2.5
3.5	6.5	4.25	5.75	5	1	5	2	4	3	4.5	6.5	5	6	5.5	2.5	3.5	2.75	3.25	3
3.5	6.5	4.25	5.75	5	1	5	2	4	3	4.5	6.5	5	6	5.5	2	4	2.5	3.5	3
3.5	6.5	4.25	5.75	5	1	5	2	4	3	4.5	6.5	5	6	5.5	1.5	4.5	2.25	3.75	3
3.5	6.5	4.25	5.75	5	1	5	2	4	3	4.5	6.5	5	6	5.5	1	5	2	4	3
3.5	6.5	4.25	5.75	5	1	5	2	4	3	4.5	6.5	5	6	5.5	3	4	3.25	3.75	3.5
3.5	6.5	4.25	5.75	5	1	5	2	4	3	4.5	6.5	5	6	5.5	2.5	4.5	3	4	3.5
3.5	6.5	4.25	5.75	5	1	5	2	4	3	4.5	6.5	5	6	5.5	2	5	2.75	4.25	3.5
3.5	6.5	4.25	5.75	5	1	5	2	4	3	4.5	6.5	5	6	5.5	1.5	5.5	2.5	4.5	3.5
3.5	6.5	4.25	5.75	5	1	5	2	4	3	4.5	6.5	5	6	5.5	1	6	2.25	4.75	3.5
3.5	6.5	4.25	5.75	5	1	5	2	4	3	4.5	6.5	5	6	5.5	3.5	4.5	3.75	4.25	4
3.5	6.5	4.25	5.75	5	1	5	2	4	3	4.5	6.5	5	6	5.5	3	5	3.5	4.5	4
3.5	6.5	4.25	5.75	5	1	5	2	4	3	4.5	6.5	5	6	5.5	2.5	5.5	3.25	4.75	4
3.5	6.5	4.25	5.75	5	1	5	2	4	3	4.5	6.5	5	6	5.5	4	5	4.25	4.75	4.5
3.5	6.5	4.25	5.75	5	1	5	2	4	3	4	7	4.75	6.25	5.5	1	2	1.25	1.75	1.5
3.5	6.5	4.25	5.75	5	1	5	2	4	3	4	7	4.75	6.25	5.5	1.5	2.5	1.75	2.25	2
3.5	6.5	4.25	5.75	5	1	5	2	4	3	4	7	4.75	6.25	5.5	1	3	1.5	2.5	2
3.5	6.5	4.25	5.75	5	1	5	2	4	3	4	7	4.75	6.25	5.5	2	3	2.25	2.75	2.5
3.5	6.5	4.25	5.75	5	1	5	2	4	3	4	7	4.75	6.25	5.5	1.5	3.5	2	3	2.5
3.5	6.5	4.25	5.75	5	1	5	2	4	3	4	7	4.75	6.25	5.5	1	4	1.75	3.25	2.5
3.5	6.5	4.25	5.75	5	1	5	2	4	3	4	7	4.75	6.25	5.5	2.5	3.5	2.75	3.25	3
3.5	6.5	4.25	5.75	5	1	5	2	4	3	4	7	4.75	6.25	5.5	2	4	2.5	3.5	3
3.5	6.5	4.25	5.75	5	1	5	2	4	3	4	7	4.75	6.25	5.5	1.5	4.5	2.25	3.75	3
3.5	6.5	4.25	5.75	5	1	5	2	4	3	4	7	4.75	6.25	5.5	1	5	2	4	3
3.5	6.5	4.25	5.75	5	1	5	2	4	3	4	7	4.75	6.25	5.5	3	4	3.25	3.75	3.5
3.5	6.5	4.25	5.75	5	1	5	2	4	3	4	7	4.75	6.25	5.5	2.5	4.5	3	4	3.5
3.5	6.5	4.25	5.75	5	1	5	2	4	3	4	7	4.75	6.25	5.5	2	5	2.75	4.25	3.5
3.5	6.5	4.25	5.75	5	1	5	2	4	3	4	7	4.75	6.25	5.5	1.5	5.5	2.5	4.5	3.5
3.5	6.5	4.25	5.75	5	1	5	2	4	3	4	7	4.75	6.25	5.5	1	6	2.25	4.75	3.5
3.5	6.5	4.25	5.75	5	1	5	2	4	3	4	7	4.75	6.25	5.5	3.5	4.5	3.75	4.25	4
3.5	6.5	4.25	5.75	5	1	5	2	4	3	4	7	4.75	6.25	5.5	3	5	3.5	4.5	4
3.5	6.5	4.25	5.75	5	1	5	2	4	3	4	7	4.75	6.25	5.5	2.5	5.5	3.25	4.75	4
3.5	6.5	4.25	5.75	5	1	5	2	4	3	4	7	4.75	6.25	5.5	4	5	4.25	4.75	4.5
3.5	6.5	4.25	5.75	5	1	5	2	4	3	5.5	6.5	5.75	6.25	6	1	2	1.25	1.75	1.5
3.5	6.5	4.25	5.75	5	1	5	2	4	3	5.5	6.5	5.75	6.25	6	1.5	2.5	1.75	2.25	2
3.5	6.5	4.25	5.75	5	1	5	2	4	3	5.5	6.5	5.75	6.25	6	1	3	1.5	2.5	2
3.5	6.5	4.25	5.75	5	1	5	2	4	3	5.5	6.5	5.75	6.25	6	2	3	2.25	2.75	2.5
3.5	6.5	4.25	5.75	5	1	5	2	4	3	5.5	6.5	5.75	6.25	6	1.5	3.5	2	3	2.5
3.5	6.5	4.25	5.75	5	1	5	2	4	3	5.5	6.5	5.75	6.25	6	1	4	1.75	3.25	2.5
3.5	6.5	4.25	5.75	5	1	5	2	4	3	5.5	6.5	5.75	6.25	6	2.5	3.5	2.75	3.25	3
3.5	6.5	4.25	5.75	5	1	5	2	4	3	5.5	6.5	5.75	6.25	6	2	4	2.5	3.5	3
3.5	6.5	4.25	5.75	5	1	5	2	4	3	5.5	6.5	5.75	6.25	6	1.5	4.5	2.25	3.75	3
3.5	6.5	4.25	5.75	5	1	5	2	4	3	5.5	6.5	5.75	6.25	6	1	5	2	4	3
3.5	6.5	4.25	5.75	5	1	5	2	4	3	5.5	6.5	5.75	6.25	6	3	4	3.25	3.75	3.5
3.5	6.5	4.25	5.75	5	1	5	2	4	3	5.5	6.5	5.75	6.25	6	2.5	4.5	3	4	3.5
3.5	6.5	4.25	5.75	5	1	5	2	4	3	5.5	6.5	5.75	6.25	6	2	5	2.75	4.25	3.5
3.5	6.5	4.25	5.75	5	1	5	2	4	3	5.5	6.5	5.75	6.25	6	1.5	5.5	2.5	4.5	3.5
3.5	6.5	4.25	5.75	5	1	5	2	4	3	5.5	6.5	5.75	6.25	6	1	6	2.25	4.75	3.5
3.5	6.5	4.25	5.75	5	1	5	2	4	3	5.5	6.5	5.75	6.25	6	3.5	4.5	3.75	4.25	4
3.5	6.5	4.25	5.75	5	1	5	2	4	3	5.5	6.5	5.75	6.25	6	3	5	3.5	4.5	4
3.5	6.5	4.25	5.75	5	1	5	2	4	3	5.5	6.5	5.75	6.25	6	2.5	5.5	3.25	4.75	4
3.5	6.5	4.25	5.75	5	1	5	2	4	3	5.5	6.5	5.75	6.25	6	4	5	4.25	4.75	4.5
3.5	6.5	4.25	5.75	5	1	5	2	4	3	5	7	5.5	6.5	6	1	2	1.25	1.75	1.5
3.5	6.5	4.25	5.75	5	1	5	2	4	3	5	7	5.5	6.5	6	1.5	2.5	1.75	2.25	2
3.5	6.5	4.25	5.75	5	1	5	2	4	3	5	7	5.5	6.5	6	1	3	1.5	2.5	2
3.5	6.5	4.25	5.75	5	1	5	2	4	3	5	7	5.5	6.5	6	2	3	2.25	2.75	2.5
3.5	6.5	4.25	5.75	5	1	5	2	4	3	5	7	5.5	6.5	6	1.5	3.5	2	3	2.5
3.5	6.5	4.25	5.75	5	1	5	2	4	3	5	7	5.5	6.5	6	1	4	1.75	3.25	2.5
3.5	6.5	4.25	5.75	5	1	5	2	4	3	5	7	5.5	6.5	6	2.5	3.5	2.75	3.25	3
3.5	6.5	4.25	5.75	5	1	5	2	4	3	5	7	5.5	6.5	6	2	4	2.5	3.5	3
3.5	6.5	4.25	5.75	5	1	5	2	4	3	5	7	5.5	6.5	6	1.5	4.5	2.25	3.75	3
3.5	6.5	4.25	5.75	5	1	5	2	4	3	5	7	5.5	6.5	6	1	5	2	4	3
3.5	6.5	4.25	5.75	5	1	5	2	4	3	5	7	5.5	6.5	6	3	4	3.25	3.75	3.5
3.5	6.5	4.25	5.75	5	1	5	2	4	3	5	7	5.5	6.5	6	2.5	4.5	3	4	3.5
3.5	6.5	4.25	5.75	5	1	5	2	4	3	5	7	5.5	6.5	6	2	5	2.75	4.25	3.5
3.5	6.5	4.25	5.75	5	1	5	2	4	3	5	7	5.5	6.5	6	1.5	5.5	2.5	4.5	3.5
3.5	6.5	4.25	5.75	5	1	5	2	4	3	5	7	5.5	6.5	6	1	6	2.25	4.75	3.5
3.5	6.5	4.25	5.75	5	1	5	2	4	3	5	7	5.5	6.5	6	3.5	4.5	3.75	4.25	4
3.5	6.5	4.25	5.75	5	1	5	2	4	3	5	7	5.5	6.5	6	3	5	3.5	4.5	4
3.5	6.5	4.25	5.75	5	1	5	2	4	3	5	7	5.5	6.5	6	2.5	5.5	3.25	4.75	4
3.5	6.5	4.25	5.75	5	1	5	2	4	3	5	7	5.5	6.5	6	4	5	4.25	4.75	4.5
3.5	6.5	4.25	5.75	5	1	5	2	4	3	6	7	6.25	6.75	6.5	1	2	1.25	1.75	1.5
3.5	6.5	4.25	5.75	5	1	5	2	4	3	6	7	6.25	6.75	6.5	1.5	2.5	1.75	2.25	2
3.5	6.5	4.25	5.75	5	1	5	2	4	3	6	7	6.25	6.75	6.5	1	3	1.5	2.5	2
3.5	6.5	4.25	5.75	5	1	5	2	4	3	6	7	6.25	6.75	6.5	2	3	2.25	2.75	2.5
3.5	6.5	4.25	5.75	5	1	5	2	4	3	6	7	6.25	6.75	6.5	1.5	3.5	2	3	2.5
3.5	6.5	4.25	5.75	5	1	5	2	4	3	6	7	6.25	6.75	6.5	1	4	1.75	3.25	2.5
3.5	6.5	4.25	5.75	5	1	5	2	4	3	6	7	6.25	6.75	6.5	2.5	3.5	2.75	3.25	3
3.5	6.5	4.25	5.75	5	1	5	2	4	3	6	7	6.25	6.75	6.5	2	4	2.5	3.5	3
3.5	6.5	4.25	5.75	5	1	5	2	4	3	6	7	6.25	6.75	6.5	1.5	4.5	2.25	3.75	3
3.5	6.5	4.25	5.75	5	1	5	2	4	3	6	7	6.25	6.75	6.5	1	5	2	4	3
3.5	6.5	4.25	5.75	5	1	5	2	4	3	6	7	6.25	6.75	6.5	3	4	3.25	3.75	3.5
3.5	6.5	4.25	5.75	5	1	5	2	4	3	6	7	6.25	6.75	6.5	2.5	4.5	3	4	3.5
3.5	6.5	4.25	5.75	5	1	5	2	4	3	6	7	6.25	6.75	6.5	2	5	2.75	4.25	3.5
3.5	6.5	4.25	5.75	5	1	5	2	4	3	6	7	6.25	6.75	6.5	1.5	5.5	2.5	4.5	3.5
3.5	6.5	4.25	5.75	5	1	5	2	4	3	6	7	6.25	6.75	6.5	1	6	2.25	4.75	3.5
3.5	6.5	4.25	5.75	5	1	5	2	4	3	6	7	6.25	6.75	6.5	3.5	4.5	3.75	4.25	4
3.5	6.5	4.25	5.75	5	1	5	2	4	3	6	7	6.25	6.75	6.5	3	5	3.5	4.5	4
3.5	6.5	4.25	5.75	5	1	5	2	4	3	6	7	6.25	6.75	6.5	2.5	5.5	3.25	4.75	4
3.5	6.5	4.25	5.75	5	1	5	2	4	3	6	7	6.25	6.75	6.5	4	5	4.25	4.75	4.5
4	7	4.75	6.25	5.5	1	5	2	4	3	4.5	5.5	4.75	5.25	5	1	2	1.25	1.75	1.5
4	7	4.75	6.25	5.5	1	5	2	4	3	4.5	5.5	4.75	5.25	5	1.5	2.5	1.75	2.25	2
4	7	4.75	6.25	5.5	1	5	2	4	3	4.5	5.5	4.75	5.25	5	1	3	1.5	2.5	2
4	7	4.75	6.25	5.5	1	5	2	4	3	4.5	5.5	4.75	5.25	5	2	3	2.25	2.75	2.5
4	7	4.75	6.25	5.5	1	5	2	4	3	4.5	5.5	4.75	5.25	5	1.5	3.5	2	3	2.5
4	7	4.75	6.25	5.5	1	5	2	4	3	4.5	5.5	4.75	5.25	5	1	4	1.75	3.25	2.5
4	7	4.75	6.25	5.5	1	5	2	4	3	4.5	5.5	4.75	5.25	5	2.5	3.5	2.75	3.25	3
4	7	4.75	6.25	5.5	1	5	2	4	3	4.5	5.5	4.75	5.25	5	2	4	2.5	3.5	3
4	7	4.75	6.25	5.5	1	5	2	4	3	4.5	5.5	4.75	5.25	5	1.5	4.5	2.25	3.75	3
4	7	4.75	6.25	5.5	1	5	2	4	3	4.5	5.5	4.75	5.25	5	1	5	2	4	3
4	7	4.75	6.25	5.5	1	5	2	4	3	4.5	5.5	4.75	5.25	5	3	4	3.25	3.75	3.5
4	7	4.75	6.25	5.5	1	5	2	4	3	4.5	5.5	4.75	5.25	5	2.5	4.5	3	4	3.5
4	7	4.75	6.25	5.5	1	5	2	4	3	4	6	4.5	5.5	5	1	2	1.25	1.75	1.5
4	7	4.75	6.25	5.5	1	5	2	4	3	4	6	4.5	5.5	5	1.5	2.5	1.75	2.25	2
4	7	4.75	6.25	5.5	1	5	2	4	3	4	6	4.5	5.5	5	1	3	1.5	2.5	2
4	7	4.75	6.25	5.5	1	5	2	4	3	4	6	4.5	5.5	5	2	3	2.25	2.75	2.5
4	7	4.75	6.25	5.5	1	5	2	4	3	4	6	4.5	5.5	5	1.5	3.5	2	3	2.5
4	7	4.75	6.25	5.5	1	5	2	4	3	4	6	4.5	5.5	5	1	4	1.75	3.25	2.5
4	7	4.75	6.25	5.5	1	5	2	4	3	4	6	4.5	5.5	5	2.5	3.5	2.75	3.25	3
4	7	4.75	6.25	5.5	1	5	2	4	3	4	6	4.5	5.5	5	2	4	2.5	3.5	3
4	7	4.75	6.25	5.5	1	5	2	4	3	4	6	4.5	5.5	5	1.5	4.5	2.25	3.75	3
4	7	4.75	6.25	5.5	1	5	2	4	3	4	6	4.5	5.5	5	1	5	2	4	3
4	7	4.75	6.25	5.5	1	5	2	4	3	4	6	4.5	5.5	5	3	4	3.25	3.75	3.5
4	7	4.75	6.25	5.5	1	5	2	4	3	4	6	4.5	5.5	5	2.5	4.5	3	4	3.5
4	7	4.75	6.25	5.5	1	5	2	4	3	3.5	6.5	4.25	5.75	5	1	2	1.25	1.75	1.5
4	7	4.75	6.25	5.5	1	5	2	4	3	3.5	6.5	4.25	5.75	5	1.5	2.5	1.75	2.25	2
4	7	4.75	6.25	5.5	1	5	2	4	3	3.5	6.5	4.25	5.75	5	1	3	1.5	2.5	2
4	7	4.75	6.25	5.5	1	5	2	4	3	3.5	6.5	4.25	5.75	5	2	3	2.25	2.75	2.5
4	7	4.75	6.25	5.5	1	5	2	4	3	3.5	6.5	4.25	5.75	5	1.5	3.5	2	3	2.5
4	7	4.75	6.25	5.5	1	5	2	4	3	3.5	6.5	4.25	5.75	5	1	4	1.75	3.25	2.5
4	7	4.75	6.25	5.5	1	5	2	4	3	3.5	6.5	4.25	5.75	5	2.5	3.5	2.75	3.25	3
4	7	4.75	6.25	5.5	1	5	2	4	3	3.5	6.5	4.25	5.75	5	2	4	2.5	3.5	3
4	7	4.75	6.25	5.5	1	5	2	4	3	3.5	6.5	4.25	5.75	5	1.5	4.5	2.25	3.75	3
4	7	4.75	6.25	5.5	1	5	2	4	3	3.5	6.5	4.25	5.75	5	1	5	2	4	3
4	7	4.75	6.25	5.5	1	5	2	4	3	3.5	6.5	4.25	5.75	5	3	4	3.25	3.75	3.5
4	7	4.75	6.25	5.5	1	5	2	4	3	3.5	6.5	4.25	5.75	5	2.5	4.5	3	4	3.5
4	7	4.75	6.25	5.5	1	5	2	4	3	3	7	4	6	5	1	2	1.25	1.75	1.5
4	7	4.75	6.25	5.5	1	5	2	4	3	3	7	4	6	5	1.5	2.5	1.75	2.25	2
4	7	4.75	6.25	5.5	1	5	2	4	3	3	7	4	6	5	1	3	1.5	2.5	2
4	7	4.75	6.25	5.5	1	5	2	4	3	3	7	4	6	5	2	3	2.25	2.75	2.5
4	7	4.75	6.25	5.5	1	5	2	4	3	3	7	4	6	5	1.5	3.5	2	3	2.5
4	7	4.75	6.25	5.5	1	5	2	4	3	3	7	4	6	5	1	4	1.75	3.25	2.5
4	7	4.75	6.25	5.5	1	5	2	4	3	3	7	4	6	5	2.5	3.5	2.75	3.25	3
4	7	4.75	6.25	5.5	1	5	2	4	3	3	7	4	6	5	2	4	2.5	3.5	3
4	7	4.75	6.25	5.5	1	5	2	4	3	3	7	4	6	5	1.5	4.5	2.25	3.75	3
4	7	4.75	6.25	5.5	1	5	2	4	3	3	7	4	6	5	1	5	2	4	3
4	7	4.75	6.25	5.5	1	5	2	4	3	3	7	4	6	5	3	4	3.25	3.75	3.5
4	7	4.75	6.25	5.5	1	5	2	4	3	3	7	4	6	5	2.5	4.5	3	4	3.5
4	7	4.75	6.25	5.5	1	5	2	4	3	5	6	5.25	5.75	5.5	1	2	1.25	1.75	1.5
4	7	4.75	6.25	5.5	1	5	2	4	3	5	6	5.25	5.75	5.5	1.5	2.5	1.75	2.25	2
4	7	4.75	6.25	5.5	1	5	2	4	3	5	6	5.25	5.75	5.5	1	3	1.5	2.5	2
4	7	4.75	6.25	5.5	1	5	2	4	3	5	6	5.25	5.75	5.5	2	3	2.25	2.75	2.5
4	7	4.75	6.25	5.5	1	5	2	4	3	5	6	5.25	5.75	5.5	1.5	3.5	2	3	2.5
4	7	4.75	6.25	5.5	1	5	2	4	3	5	6	5.25	5.75	5.5	1	4	1.75	3.25	2.5
4	7	4.75	6.25	5.5	1	5	2	4	3	5	6	5.25	5.75	5.5	2.5	3.5	2.75	3.25	3
4	7	4.75	6.25	5.5	1	5	2	4	3	5	6	5.25	5.75	5.5	2	4	2.5	3.5	3
4	7	4.75	6.25	5.5	1	5	2	4	3	5	6	5.25	5.75	5.5	1.5	4.5	2.25	3.75	3
4	7	4.75	6.25	5.5	1	5	2	4	3	5	6	5.25	5.75	5.5	1	5	2	4	3
4	7	4.75	6.25	5.5	1	5	2	4	3	5	6	5.25	5.75	5.5	3	4	3.25	3.75	3.5
4	7	4.75	6.25	5.5	1	5	2	4	3	5	6	5.25	5.75	5.5	2.5	4.5	3	4	3.5
4	7	4.75	6.25	5.5	1	5	2	4	3	4.5	6.5	5	6	5.5	1	2	1.25	1.75	1.5
4	7	4.75	6.25	5.5	1	5	2	4	3	4.5	6.5	5	6	5.5	1.5	2.5	1.75	2.25	2
4	7	4.75	6.25	5.5	1	5	2	4	3	4.5	6.5	5	6	5.5	1	3	1.5	2.5	2
4	7	4.75	6.25	5.5	1	5	2	4	3	4.5	6.5	5	6	5.5	2	3	2.25	2.75	2.5
4	7	4.75	6.25	5.5	1	5	2	4	3	4.5	6.5	5	6	5.5	1.5	3.5	2	3	2.5
4	7	4.75	6.25	5.5	1	5	2	4	3	4.5	6.5	5	6	5.5	1	4	1.75	3.25	2.5
4	7	4.75	6.25	5.5	1	5	2	4	3	4.5	6.5	5	6	5.5	2.5	3.5	2.75	3.25	3
4	7	4.75	6.25	5.5	1	5	2	4	3	4.5	6.5	5	6	5.5	2	4	2.5	3.5	3
4	7	4.75	6.25	5.5	1	5	2	4	3	4.5	6.5	5	6	5.5	1.5	4.5	2.25	3.75	3
4	7	4.75	6.25	5.5	1	5	2	4	3	4.5	6.5	5	6	5.5	1	5	2	4	3
4	7	4.75	6.25	5.5	1	5	2	4	3	4.5	6.5	5	6	5.5	3	4	3.25	3.75	3.5
4	7	4.75	6.25	5.5	1	5	2	4	3	4.5	6.5	5	6	5.5	2.5	4.5	3	4	3.5
4	7	4.75	6.25	5.5	1	5	2	4	3	4	7	4.75	6.25	5.5	1	2	1.25	1.75	1.5
4	7	4.75	6.25	5.5	1	5	2	4	3	4	7	4.75	6.25	5.5	1.5	2.5	1.75	2.25	2
4	7	4.75	6.25	5.5	1	5	2	4	3	4	7	4.75	6.25	5.5	1	3	1.5	2.5	2
4	7	4.75	6.25	5.5	1	5	2	4	3	4	7	4.75	6.25	5.5	2	3	2.25	2.75	2.5
4	7	4.75	6.25	5.5	1	5	2	4	3	4	7	4.75	6.25	5.5	1.5	3.5	2	3	2.5
4	7	4.75	6.25	5.5	1	5	2	4	3	4	7	4.75	6.25	5.5	1	4	1.75	3.25	2.5
4	7	4.75	6.25	5.5	1	5	2	4	3	4	7	4.75	6.25	5.5	2.5	3.5	2.75	3.25	3
4	7	4.75	6.25	5.5	1	5	2	4	3	4	7	4.75	6.25	5.5	2	4	2.5	3.5	3
4	7	4.75	6.25	5.5	1	5	2	4	3	4	7	4.75	6.25	5.5	1.5	4.5	2.25	3.75	3
4	7	4.75	6.25	5.5	1	5	2	4	3	4	7	4.75	6.25	5.5	1	5	2	4	3
4	7	4.75	6.25	5.5	1	5	2	4	3	4	7	4.75	6.25	5.5	3	4	3.25	3.75	3.5
4	7	4.75	6.25	5.5	1	5	2	4	3	4	7	4.75	6.25	5.5	2.5	4.5	3	4	3.5
4	7	4.75	6.25	5.5	1	5	2	4	3	5.5	6.5	5.75	6.25	6	1	2	1.25	1.75	1.5
4	7	4.75	6.25	5.5	1	5	2	4	3	5.5	6.5	5.75	6.25	6	1.5	2.5	1.75	2.25	2
4	7	4.75	6.25	5.5	1	5	2	4	3	5.5	6.5	5.75	6.25	6	1	3	1.5	2.5	2
4	7	4.75	6.25	5.5	1	5	2	4	3	5.5	6.5	5.75	6.25	6	2	3	2.25	2.75	2.5
4	7	4.75	6.25	5.5	1	5	2	4	3	5.5	6.5	5.75	6.25	6	1.5	3.5	2	3	2.5
4	7	4.75	6.25	5.5	1	5	2	4	3	5.5	6.5	5.75	6.25	6	1	4	1.75	3.25	2.5
4	7	4.75	6.25	5.5	1	5	2	4	3	5.5	6.5	5.75	6.25	6	2.5	3.5	2.75	3.25	3
4	7	4.75	6.25	5.5	1	5	2	4	3	5.5	6.5	5.75	6.25	6	2	4	2.5	3.5	3
4	7	4.75	6.25	5.5	1	5	2	4	3	5.5	6.5	5.75	6.25	6	1.5	4.5	2.25	3.75	3
4	7	4.75	6.25	5.5	1	5	2	4	3	5.5	6.5	5.75	6.25	6	1	5	2	4	3
4	7	4.75	6.25	5.5	1	5	2	4	3	5.5	6.5	5.75	6.25	6	3	4	3.25	3.75	3.5
4	7	4.75	6.25	5.5	1	5	2	4	3	5.5	6.5	5.75	6.25	6	2.5	4.5	3	4	3.5
4	7	4.75	6.25	5.5	1	5	2	4	3	5	7	5.5	6.5	6	1	2	1.25	1.75	1.5
4	7	4.75	6.25	5.5	1	5	2	4	3	5	7	5.5	6.5	6	1.5	2.5	1.75	2.25	2
4	7	4.75	6.25	5.5	1	5	2	4	3	5	7	5.5	6.5	6	1	3	1.5	2.5	2
4	7	4.75	6.25	5.5	1	5	2	4	3	5	7	5.5	6.5	6	2	3	2.25	2.75	2.5
4	7	4.75	6.25	5.5	1	5	2	4	3	5	7	5.5	6.5	6	1.5	3.5	2	3	2.5
4	7	4.75	6.25	5.5	1	5	2	4	3	5	7	5.5	6.5	6	1	4	1.75	3.25	2.5
4	7	4.75	6.25	5.5	1	5	2	4	3	5	7	5.5	6.5	6	2.5	3.5	2.75	3.25	3
4	7	4.75	6.25	5.5	1	5	2	4	3	5	7	5.5	6.5	6	2	4	2.5	3.5	3
4	7	4.75	6.25	5.5	1	5	2	4	3	5	7	5.5	6.5	6	1.5	4.5	2.25	3.75	3
4	7	4.75	6.25	5.5	1	5	2	4	3	5	7	5.5	6.5	6	1	5	2	4	3
4	7	4.75	6.25	5.5	1	5	2	4	3	5	7	5.5	6.5	6	3	4	3.25	3.75	3.5
4	7	4.75	6.25	5.5	1	5	2	4	3	5	7	5.5	6.5	6	2.5	4.5	3	4	3.5
4	7	4.75	6.25	5.5	1	5	2	4	3	6	7	6.25	6.75	6.5	1	2	1.25	1.75	1.5
4	7	4.75	6.25	5.5	1	5	2	4	3	6	7	6.25	6.75	6.5	1.5	2.5	1.75	2.25	2
4	7	4.75	6.25	5.5	1	5	2	4	3	6	7	6.25	6.75	6.5	1	3	1.5	2.5	2
4	7	4.75	6.25	5.5	1	5	2	4	3	6	7	6.25	6.75	6.5	2	3	2.25	2.75	2.5
4	7	4.75	6.25	5.5	1	5	2	4	3	6	7	6.25	6.75	6.5	1.5	3.5	2	3	2.5
4	7	4.75	6.25	5.5	1	5	2	4	3	6	7	6.25	6.75	6.5	1	4	1.75	3.25	2.5
4	7	4.75	6.25	5.5	1	5	2	4	3	6	7	6.25	6.75	6.5	2.5	3.5	2.75	3.25	3
4	7	4.75	6.25	5.5	1	5	2	4	3	6	7	6.25	6.75	6.5	2	4	2.5	3.5	3
4	7	4.75	6.25	5.5	1	5	2	4	3	6	7	6.25	6.75	6.5	1.5	4.5	2.25	3.75	3
4	7	4.75	6.25	5.5	1	5	2	4	3	6	7	6.25	6.75	6.5	1	5	2	4	3
4	7	4.75	6.25	5.5	1	5	2	4	3	6	7	6.25	6.75	6.5	3	4	3.25	3.75	3.5
4	7	4.75	6.25	5.5	1	5	2	4	3	6	7	6.25	6.75	6.5	2.5	4.5	3	4	3.5

## Sheet: Pass 2
Vd1					Ed1					Ec1					Ec2
(-2)	(+2)	(-1)	(+1)	(0)	(-2)	(+2)	(-1)	(+1)	(0)	(-2)	(+2)	(-1)	(+1)	(0)	(-2)	(+2)	(-1)	(+1)	(0)
3.5	6.5	4.25	5.75	5	1	5	2	4	3	3	7	4	6	5	1	2	1.25	1.75	1.5
3.5	6.5	4.25	5.75	5	1	5	2	4	3	3	7	4	6	5	1.5	2.5	1.75	2.25	2
3.5	6.5	4.25	5.75	5	1	5	2	4	3	3	7	4	6	5	1	3	1.5	2.5	2
3.5	6.5	4.25	5.75	5	1	5	2	4	3	3	7	4	6	5	2	3	2.25	2.75	2.5
3.5	6.5	4.25	5.75	5	1	5	2	4	3	3	7	4	6	5	1.5	3.5	2	3	2.5
3.5	6.5	4.25	5.75	5	1	5	2	4	3	3	7	4	6	5	1	4	1.75	3.25	2.5
3.5	6.5	4.25	5.75	5	1	5	2	4	3	3	7	4	6	5	2.5	3.5	2.75	3.25	3
3.5	6.5	4.25	5.75	5	1	5	2	4	3	3	7	4	6	5	2	4	2.5	3.5	3
3.5	6.5	4.25	5.75	5	1	5	2	4	3	3	7	4	6	5	1.5	4.5	2.25	3.75	3
3.5	6.5	4.25	5.75	5	1	5	2	4	3	3	7	4	6	5	1	5	2	4	3
3.5	6.5	4.25	5.75	5	1	5	2	4	3	3	7	4	6	5	3	4	3.25	3.75	3.5
3.5	6.5	4.25	5.75	5	1	5	2	4	3	3	7	4	6	5	2.5	4.5	3	4	3.5
3.5	6.5	4.25	5.75	5	1	5	2	4	3	3	7	4	6	5	2	5	2.75	4.25	3.5
3.5	6.5	4.25	5.75	5	1	5	2	4	3	3	7	4	6	5	1.5	5.5	2.5	4.5	3.5
3.5	6.5	4.25	5.75	5	1	5	2	4	3	3	7	4	6	5	1	6	2.25	4.75	3.5
3.5	6.5	4.25	5.75	5	1	5	2	4	3	3	7	4	6	5	3.5	4.5	3.75	4.25	4
3.5	6.5	4.25	5.75	5	1	5	2	4	3	3	7	4	6	5	3	5	3.5	4.5	4
3.5	6.5	4.25	5.75	5	1	5	2	4	3	3	7	4	6	5	2.5	5.5	3.25	4.75	4
3.5	6.5	4.25	5.75	5	1	5	2	4	3	3	7	4	6	5	4	5	4.25	4.75	4.5
4	7	4.75	6.25	5.5	1	5	2	4	3	3	7	4	6	5	1	2	1.25	1.75	1.5
4	7	4.75	6.25	5.5	1	5	2	4	3	3	7	4	6	5	1.5	2.5	1.75	2.25	2
4	7	4.75	6.25	5.5	1	5	2	4	3	3	7	4	6	5	1	3	1.5	2.5	2
4	7	4.75	6.25	5.5	1	5	2	4	3	3	7	4	6	5	2	3	2.25	2.75	2.5
4	7	4.75	6.25	5.5	1	5	2	4	3	3	7	4	6	5	1.5	3.5	2	3	2.5
4	7	4.75	6.25	5.5	1	5	2	4	3	3	7	4	6	5	1	4	1.75	3.25	2.5
4	7	4.75	6.25	5.5	1	5	2	4	3	3	7	4	6	5	2.5	3.5	2.75	3.25	3
4	7	4.75	6.25	5.5	1	5	2	4	3	3	7	4	6	5	2	4	2.5	3.5	3
4	7	4.75	6.25	5.5	1	5	2	4	3	3	7	4	6	5	1.5	4.5	2.25	3.75	3
4	7	4.75	6.25	5.5	1	5	2	4	3	3	7	4	6	5	1	5	2	4	3
4	7	4.75	6.25	5.5	1	5	2	4	3	3	7	4	6	5	3	4	3.25	3.75	3.5
4	7	4.75	6.25	5.5	1	5	2	4	3	3	7	4	6	5	2.5	4.5	3	4	3.5
