# Supplementary material
Source: MDPI journal article supplement (https://www.mdpi.com/2076-3417/10/24/9064)
Supplement: s1 [file s1 › S3_v2.pdf]

# Modelling of the acetification stage in the production of wine vinegar by use of two serial bioreactors

Carmen M. Álvarez-Cáliz <sup>1</sup>, Inés María Santos-Dueñas <sup>1,\*</sup>, Jorge E. Jiménez-Hornero <sup>2</sup> and Isidoro García-García <sup>1</sup>

<sup>1</sup> Department of Chemical Engineering, University of Cordoba, Campus de Rabanales, 14071 Cordoba, Spain; q42alcac@yahoo.es (C.M.A.), ines.santos@uco.es (I.M.S.), isidoro.garcia@uco.es (I.G.)

<sup>2</sup> Department of Electrical Engineering and Automatic Control, University of Cordoba, Campus de Rabanales, 14071 Cordoba, Spain; jjimenez@uco.es (J.J.)

\* Correspondence: ines.santos@uco.es; Tel.: +34 957 218 658

This Supplementary Material describes the procedure used to obtain each of the polynomial models presented in the Results and Discussion section.

The results were initially subjected to ANOVA in order to identify statistically significant differences (i.e., differences not exclusively due to experimental error) between experiments. Then, the Forward Stepwise Regression method, described in the Material and Methods section, as implemented in the software SigmaStat 2.0 (Systat Software Inc., 2015) was used for fitting. A total of 27 terms (viz., 6 for the operational variables and 21 for their mutual interactions) were initially used even though the greatest number of terms in each polynomial could not exceed the number of experiments: 18.

Significant differences between the regression for each step of the process and the previous one by effect of the addition of new terms or removal of existing ones were sought by ANOVA. Because the differences were all significant at the 95% probability level, the results of the ANOVA are not shown here.

## S3.1. Mean overall rate of acetic acid formation in the two-bioreactor system

The experimental results of the ANOVA on this variable are shown in Table S3.1.

**Table S3.1.** Results of the ANOVA on the mean rate of acetic acid formation in the two-bioreactor system.

| Source of variability | Degrees of freedom | Variance | <i>F</i> | <i>P-value</i> |
|-----------------------|--------------------|----------|----------|----------------|
| Group                 | 17                 | 0.0098   | 97.977   | <0.001         |
| Sample                | 144                | 0.0001   |          |                |
| Total                 | 161                |          |          |                |

The *F* value at the 95% confidence level was greater than the corresponding critical point ( $F_{crit} = 1.623$ ), so there were statistically significant differences between experimental means ( $P\text{-value} < 0.001$ ).

The Forward Stepwise Regression method was applied stepwise, the polynomials being expanded with those terms having the smallest *P*-value and greatest *F* value exceeding *F*-to-enter or contracted by removing those with an *F* value smaller than *F*-to-remove (see Section 2). *F*-to-enter was set at 4 ( $P\text{-value} = 0.051$ ) and *F*-to-remove at 3.9 ( $P\text{-value} = 0.054$ ). Each step was followed by an ANOVA intended to expose significant differences between the predictions of the model for that step and the previous one. If the null hypothesis for the test could not be rejected or no term with  $F > F\text{-to-enter}$  was found, then the fitting was finished. Tables S3.2 to S3.14 show the results of each step.

Note that Step 0 invariably started by incorporating the constant term of the polynomial (see eq. 1). The terms added in each step are shown in successive rows in each table.

**Table S3.2.** Results of Step 0 in the fitting of the mean rate of acetic acid formation in the two-bioreactor system.

| Terms added | Coefficient | Standard error |
|-------------|-------------|----------------|
| Constant    | 0.171       | 0.0317         |

**Table S3.3.** Results of Step 1 in the fitting of the mean rate of acetic acid formation in the two-bioreactor system.

| Terms added | F     | Coefficient | Standard error | R     | R <sup>2</sup> |
|-------------|-------|-------------|----------------|-------|----------------|
| Constant    |       | 0.125       |                |       |                |
| $T_1E_{u1}$ | 14.71 | 0.00051     | 0.0283         | 0.470 | 0.221          |

**Table S3.4.** Results of Step 2 in the fitting of the mean rate of acetic acid formation in the two-bioreactor system.

| Terms added    | F      | Coefficient | Standard error | R     | R <sup>2</sup> |
|----------------|--------|-------------|----------------|-------|----------------|
| Constant       |        | 0.128       |                |       |                |
| $T_1E_{u1}$    | 29.685 | 0.00138     |                |       |                |
| $E_{u1}V_{u1}$ | 15.039 | -0.00543    | 0.0251         | 0.631 | 0.398          |

**Table S3.5.** Results of Step 3 in the fitting of the mean rate of acetic acid formation in the two-bioreactor system.

| Terms added    | F      | Coefficient | Standard error | R     | R <sup>2</sup> |
|----------------|--------|-------------|----------------|-------|----------------|
| Constant       |        | 0.0736      |                |       |                |
| $T_1E_{u1}$    | 23.419 | 0.00255     |                |       |                |
| $E_{u1}V_{u1}$ | 7.812  | -0.00404    |                |       |                |
| $E_{u1}^2$     | 6.271  | -0.0073     | 0.0239         | 0.682 | 0.465          |

**Table S3.6.** Results of Step 4 in the fitting of the mean rate of acetic acid formation in the two-bioreactor system.

| Terms added    | F       | Coefficient | Standard error | R     | R <sup>2</sup> |
|----------------|---------|-------------|----------------|-------|----------------|
| Constant       |         | -0.401      |                |       |                |
| $T_1E_{u1}$    | 32.001  | 0.00174     |                |       |                |
| $E_{u1}V_{u1}$ | 38.863  | -0.00499    |                |       |                |
| $E_{u1}^2$     | 124.98  | -0.0654     |                |       |                |
| $E_{u1}$       | 107.162 | 0.379       | 0.0135         | 0.912 | 0.832          |

**Table S3.7.** Results of Step 5 in the fitting of the mean rate of acetic acid formation in the two-bioreactor system.

| Terms added    | F       | Coefficient | Standard error | R | R <sup>2</sup> |
|----------------|---------|-------------|----------------|---|----------------|
| Constant       |         | -0.436      |                |   |                |
| $T_1E_{u1}$    | 24.909  | 0.00139     |                |   |                |
| $E_{u1}V_{u1}$ | 50.717  | -0.00506    |                |   |                |
| $E_{u1}^2$     | 167.788 | -0.0654     |                |   |                |
| $E_{u1}$       | 151.242 | 0.39        |                |   |                |

|             |        |          |        |       |       |
|-------------|--------|----------|--------|-------|-------|
| $T_1E_{l1}$ | 17.783 | 0.000235 |        |       |       |
|             |        |          | 0.0117 | 0.937 | 0.878 |

**Table S3.8.** Results of Step 6 in the fitting of the mean rate of acetic acid formation in the two-bioreactor system.

| Terms added    | <i>F</i> | Coefficient | Standard error | <i>R</i> | <i>R</i> <sup>2</sup> |
|----------------|----------|-------------|----------------|----------|-----------------------|
| Constant       |          | -0.534      |                |          |                       |
| $T_1E_{u1}$    | 1.996    | 0.000414    |                |          |                       |
| $E_{u1}V_{u1}$ | 83.465   | -0.00523    |                |          |                       |
| $E_{u1}^2$     | 258.949  | -0.0654     |                |          |                       |
| $E_{u1}$       | 256.947  | 0.453       |                |          |                       |
| $T_1E_{l1}$    | 44.409   | 0.000887    |                |          |                       |
| $E_{u1}E_{l1}$ | 27.079   | -0.00662    |                |          |                       |
|                |          |             | 0.00939        | 0.960    | 0.922                 |

As can be seen from Table S3.8, the *F* value for the term  $T_1E_{u1}$  was less than the preset *F*-to-remove value (3.9), so the term was removed from the polynomial in the following step.

**Table S3.9.** Results of Step 7 in the fitting of the mean rate of acetic acid formation in the two-bioreactor system.

| Terms added    | <i>F</i> | Coefficient | Standard error | <i>R</i> | <i>R</i> <sup>2</sup> |
|----------------|----------|-------------|----------------|----------|-----------------------|
| Constant       |          | -0.553      |                |          |                       |
| $E_{u1}V_{u1}$ | 82.989   | -0.00526    |                |          |                       |
| $E_{u1}^2$     | 253.683  | -0.0654     |                |          |                       |
| $E_{u1}$       | 345.574  | 0.471       |                |          |                       |
| $T_1E_{l1}$    | 106.506  | 0.00102     |                |          |                       |
| $E_{u1}E_{l1}$ | 62.234   | -0.00777    |                |          |                       |
|                |          |             | 0.00948        | 0.959    | 0.919                 |

**Table S3.10.** Results of Step 8 in the fitting of the mean rate of acetic acid formation in the two-bioreactor system.

| Terms added    | <i>F</i> | Coefficient | Standard error | <i>R</i> | <i>R</i> <sup>2</sup> |
|----------------|----------|-------------|----------------|----------|-----------------------|
| Constant       |          | -0.528      |                |          |                       |
| $E_{u1}V_{u1}$ | 5.862    | -0.00279    |                |          |                       |
| $E_{u1}^2$     | 279.705  | -0.0654     |                |          |                       |
| $E_{u1}$       | 313.563  | 0.451       |                |          |                       |
| $T_1E_{l1}$    | 117.084  | 0.00112     |                |          |                       |
| $E_{u1}E_{l1}$ | 30.981   | -0.00626    |                |          |                       |
| $E_{l1}V_{u1}$ | 5.924    | -0.00167    |                |          |                       |
|                |          |             | 0.00903        | 0.963    | 0.928                 |

**Table S3.11.** Results of Step 9 in the fitting of the mean rate of acetic acid formation in the two-bioreactor system.

| Terms added    | <i>F</i> | Coefficient | Standard error | <i>R</i> | <i>R</i> <sup>2</sup> |
|----------------|----------|-------------|----------------|----------|-----------------------|
| Constant       |          | -0.534      |                |          |                       |
| $E_{u1}V_{u1}$ | 7.075    | -0.00296    |                |          |                       |
| $E_{u1}^2$     | 302.772  | -0.0654     |                |          |                       |
| $E_{u1}$       | 339.204  | 0.451       |                |          |                       |
| $T_1E_{l1}$    | 113.912  | 0.00108     |                |          |                       |
| $E_{u1}E_{l1}$ | 31.315   | -0.00607    |                |          |                       |
| $E_{l1}V_{u1}$ | 5.517    | -0.00155    |                |          |                       |

|             |       |           |         |       |       |
|-------------|-------|-----------|---------|-------|-------|
| $E_{l2}T_1$ | 4.876 | 0.0000911 |         |       |       |
|             |       |           | 0.00868 | 0.967 | 0.935 |

**Table S3.12.** Results of Step 10 in the fitting of the mean rate of acetic acid formation in the two-bioreactor system.

| Terms added    | $F$     | Coefficient | Standard error | $R$   | $R^2$ |
|----------------|---------|-------------|----------------|-------|-------|
| Constant       |         | -0.525      |                |       |       |
| $E_{u1}V_{u1}$ | 2.779   | -0.00185    |                |       |       |
| $E_{u1}^2$     | 348.659 | -0.0654     |                |       |       |
| $E_{u1}$       | 370.659 | 0.443       |                |       |       |
| $T_1E_{l1}$    | 20.952  | 0.000726    |                |       |       |
| $E_{u1}E_{l1}$ | 29.138  | -0.00555    |                |       |       |
| $E_{l1}V_{u1}$ | 0.0826  | 0.000255    |                |       |       |
| $E_{l2}T_1$    | 10.297  | 0.000675    |                |       |       |
| $E_{l2}V_{u1}$ | 7.972   | -0.00354    |                |       |       |
|                |         |             | 0.00868        | 0.967 | 0.935 |

As can be seen from Table S3.12, two terms had an  $F$  value smaller than  $F$ -to-remove. Therefore, the term with the smaller  $F$  value (viz.,  $E_{l1}V_{u1}$ ) was removed in the following step.

**Table S3.13.** Results of Step 11 in the fitting of the mean rate of acetic acid formation in the two-bioreactor system.

| Terms added    | $F$     | Coefficient | Standard error | $R$   | $R^2$ |
|----------------|---------|-------------|----------------|-------|-------|
| Constant       |         | -0.524      |                |       |       |
| $E_{u1}V_{u1}$ | 2.815   | -0.00175    |                |       |       |
| $E_{u1}^2$     | 355.754 | -0.0654     |                |       |       |
| $E_{u1}$       | 383.142 | 0.442       |                |       |       |
| $T_1E_{l1}$    | 55.538  | 0.00076     |                |       |       |
| $E_{u1}E_{l1}$ | 30.742  | -0.00548    |                |       |       |
| $E_{l2}T_1$    | 19.019  | 0.000632    |                |       |       |
| $E_{l2}V_{u1}$ | 14.532  | -0.00328    |                |       |       |
|                |         |             | 0.00801        | 0.972 | 0.945 |

As can be seen, Table S3.13 contained a term with  $F < F$ -to-remove (viz.,  $E_{u1}V_{u1}$ , which was thus discarded in Step 12).

**Table S3.14.** Results of Step 12 in the fitting of the mean rate of acetic acid formation in the two-bioreactor system.

| Terms added    | $F$     | Coefficient | Standard error | $R$   | $R^2$ |
|----------------|---------|-------------|----------------|-------|-------|
| Constant       |         | -0.51       |                |       |       |
| $E_{u1}^2$     | 342.526 | -0.0654     |                |       |       |
| $E_{u1}$       | 392.086 | 0.43        |                |       |       |
| $T_1E_{l1}$    | 56.948  | 0.000672    |                |       |       |
| $E_{u1}E_{l1}$ | 28.095  | -0.00468    |                |       |       |
| $E_{l2}T_1$    | 119.001 | 0.000839    |                |       |       |
| $E_{l2}V_{u1}$ | 122.922 | -0.00456    |                |       |       |
|                |         |             | 0.00816        | 0.970 | 0.941 |

Beyond this point, no term had  $F > F$ -to-enter so the polynomial was not further expanded and the fitting process was finished. The final polynomial is that of eq. 5 of the manuscript.

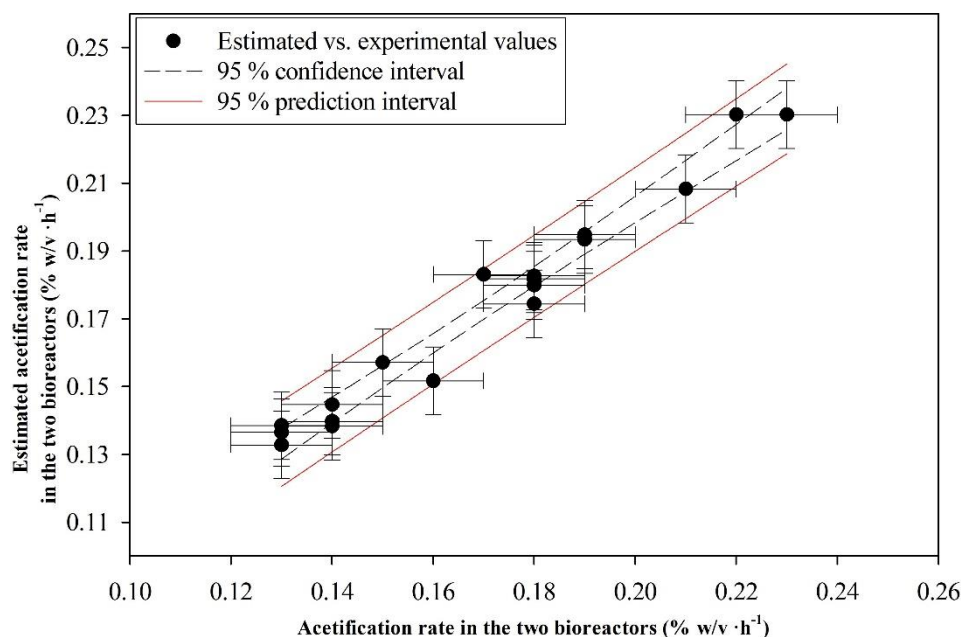

**Figure S3.1.** Plot of  $(r_A)_{global\ est}$  against  $(r_A)_{global}$  and curves for the 95% confidence and prediction intervals.

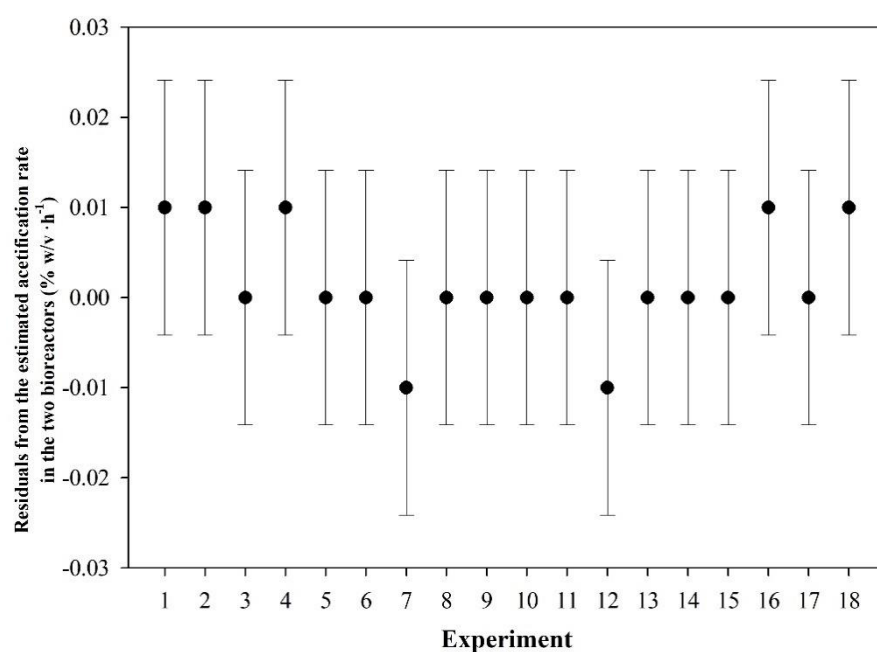

**Figure S3.2.** Residuals of the fitting of  $(r_A)_{global\ est}$  for each experiment.

### S3.2. Total acetic acid production in the two-bioreactor system

The experimental results of the ANOVA on this variable are shown in Table S3.15.

**Table S3.15.** Results of the ANOVA on the total acetic acid production in the two-bioreactor system.

| Source of variability | Degrees of freedom | Variance | <i>F</i> | <i>P-value</i> |
|-----------------------|--------------------|----------|----------|----------------|
| Group                 | 17                 | 193.059  | 326.795  | <0.001         |
| Sample                | 144                | 0.591    |          |                |
| Total                 | 161                |          |          |                |

The  $F$  value at the 95% confidence level was greater than the corresponding critical point ( $F_{\text{crit}} = 1.623$ ), so there were statistically significant differences between experimental means ( $P\text{-value} < 0.001$ ).

The Forward Stepwise Regression method was applied.  $F$ -to-enter was set at 4 and  $F$ -to-remove at 3.9. Tables S3.16 to S3.28 show the results of each step. The terms added in each step are shown in successive rows in each table.

**Table S3.16.** Results of Step 0 in the fitting of the total acetic acid production in the two-bioreactor system.

| Terms added | Coefficient | Standard error |
|-------------|-------------|----------------|
| Constant    | 22.445      | 4.231          |

**Table S3.17.** Results of Step 1 in the fitting of the total acetic acid production in the two-bioreactor system.

| Terms added | $F$    | Coefficient | Standard error | $R$   | $R^2$ |
|-------------|--------|-------------|----------------|-------|-------|
| Constant    |        | 12.485      |                |       |       |
| $T_1E_{l1}$ | 15.002 | 0.0664      | 3.763          | 0.473 | 0.224 |

**Table S3.18.** Results of Step 2 in the fitting of the total acetic acid production in the two-bioreactor system.

| Terms added | $F$    | Coefficient | Standard error | $R$   | $R^2$ |
|-------------|--------|-------------|----------------|-------|-------|
| Constant    |        | 5.45        |                |       |       |
| $T_1E_{l1}$ | 12.132 | 0.177       |                |       |       |
| $E_{l1}^2$  | 5.306  | -0.372      | 3.616          | 0.545 | 0.297 |

**Table S3.19.** Results of Step 3 in the fitting of the total acetic acid production in the two-bioreactor system.

| Terms added | $F$     | Coefficient | Standard error | $R$   | $R^2$ |
|-------------|---------|-------------|----------------|-------|-------|
| Constant    |         | -220.174    |                |       |       |
| $T_1E_{l1}$ | 27.548  | 0.148       |                |       |       |
| $E_{l1}^2$  | 127.466 | -9.708      |                |       |       |
| $E_{l1}$    | 119.158 | 94.363      | 1.986          | 0.890 | 0.792 |

**Table S3.20.** Results of Step 4 in the fitting of the total acetic acid production in the two-bioreactor system.

| Terms added | $F$     | Coefficient | Standard error | $R$   | $R^2$ |
|-------------|---------|-------------|----------------|-------|-------|
| Constant    |         | -223.529    |                |       |       |
| $T_1E_{l1}$ | 34.781  | 0.146       |                |       |       |
| $E_{l1}^2$  | 163.678 | -9.708      |                |       |       |
| $E_{l1}$    | 153.13  | 94.4        |                |       |       |
| $T_2E_{l2}$ | 15.205  | 0.032       | 1.986          | 0.917 | 0.841 |

**Table S3.21.** Results of Step 5 in the fitting of the total acetic acid production in the two-bioreactor system.

| Terms added | <i>F</i> | Coefficient | Standard error | <i>R</i> | <i>R</i> <sup>2</sup> |
|-------------|----------|-------------|----------------|----------|-----------------------|
| Constant    |          | -217.918    |                |          |                       |
| $T_1E_{l1}$ | 57.572   | 0.182       |                |          |                       |
| $E_{l1}^2$  | 207.527  | -9.708      |                |          |                       |
| $E_{l1}$    | 189.413  | 93.324      |                |          |                       |
| $T_2E_{l2}$ | 19.096   | 0.0318      |                |          |                       |
| $T_1V_{u1}$ | 14.127   | -0.0373     |                |          |                       |
|             |          |             | 1.556          | 0.937    | 0.877                 |

**Table S3.22.** Results of Step 6 in the fitting of the total acetic acid production in the two-bioreactor system.

| Terms added | <i>F</i> | Coefficient | Standard error | <i>R</i> | <i>R</i> <sup>2</sup> |
|-------------|----------|-------------|----------------|----------|-----------------------|
| Constant    |          | -218.368    |                |          |                       |
| $T_1E_{l1}$ | 40.423   | 0.496       |                |          |                       |
| $E_{l1}^2$  | 278.459  | -9.708      |                |          |                       |
| $E_{l1}$    | 178.929  | 83.914      |                |          |                       |
| $T_2E_{l2}$ | 23.486   | 0.0305      |                |          |                       |
| $T_1V_{u1}$ | 21.359   | -0.363      |                |          |                       |
| $V_{u1}$    | 17.406   | 9.902       |                |          |                       |
|             |          |             | 1.344          | 0.954    | 0.911                 |

**Table S3.23.** Results of Step 7 in the fitting of the total acetic acid production in the two-bioreactor system.

| Terms added | <i>F</i> | Coefficient | Standard error | <i>R</i> | <i>R</i> <sup>2</sup> |
|-------------|----------|-------------|----------------|----------|-----------------------|
| Constant    |          | -219.721    |                |          |                       |
| $T_1E_{l1}$ | 44.712   | 0.496       |                |          |                       |
| $E_{l1}^2$  | 308.001  | -9.708      |                |          |                       |
| $E_{l1}$    | 197.911  | 83.914      |                |          |                       |
| $T_2E_{l2}$ | 25.978   | 0.0305      |                |          |                       |
| $T_1V_{u1}$ | 23.625   | -0.363      |                |          |                       |
| $V_{u1}$    | 19.253   | 9.902       |                |          |                       |
| $E_{u1}$    | 5.986    | 0.451       |                |          |                       |
|             |          |             | 1.277          | 0.960    | 0.921                 |

**Table S3.24.** Results of Step 8 in the fitting of the total acetic acid production in the two-bioreactor system.

| Terms added | <i>F</i> | Coefficient | Standard error | <i>R</i> | <i>R</i> <sup>2</sup> |
|-------------|----------|-------------|----------------|----------|-----------------------|
| Constant    |          | -220.023    |                |          |                       |
| $T_1E_{l1}$ | 48.403   | 0.494       |                |          |                       |
| $E_{l1}^2$  | 335.979  | -9.708      |                |          |                       |
| $E_{l1}$    | 216.172  | 83.97       |                |          |                       |
| $T_2E_{l2}$ | 32.359   | 0.0334      |                |          |                       |
| $T_1V_{u1}$ | 25.511   | -0.362      |                |          |                       |
| $V_{u1}$    | 20.769   | 9.847       |                |          |                       |
| $E_{u1}$    | 7.531    | 2.403       |                |          |                       |
| $T_2E_{u1}$ | 5.179    | -0.065      |                |          |                       |
|             |          |             | 1.223          | 0.964    | 0.929                 |

**Table S3.25.** Results of Step 9 in the fitting of the total acetic acid production in the two-bioreactor system.

| Terms added | <i>F</i> | Coefficient | Standard error | <i>R</i> | <i>R</i> <sup>2</sup> |
|-------------|----------|-------------|----------------|----------|-----------------------|
| Constant    |          | -219.853    |                |          |                       |
| $T_1E_{l1}$ | 84.488   | 0.495       |                |          |                       |
| $E_{l1}^2$  | 583.992  | -9.708      |                |          |                       |
| $E_{l1}$    | 302.445  | 77.646      |                |          |                       |
| $T_2E_{l2}$ | 50.719   | 0.0317      |                |          |                       |
| $T_1V_{u1}$ | 44.594   | -0.363      |                |          |                       |
| $V_{u1}$    | 36.325   | 9.878       |                |          |                       |
| $E_{u1}$    | 46.083   | 11.79       |                |          |                       |
| $T_2E_{u1}$ | 42.879   | -0.378      |                |          |                       |
| $T_2E_{l1}$ | 34.218   | 0.21        |                |          |                       |
|             |          |             | 0.928          | 0.980    | 0.960                 |

**Table S3.26.** Results of Step 10 in the fitting of the total acetic acid production in the two-bioreactor system.

| Terms added    | <i>F</i> | Coefficient | Standard error | <i>R</i> | <i>R</i> <sup>2</sup> |
|----------------|----------|-------------|----------------|----------|-----------------------|
| Constant       |          | -225.816    |                |          |                       |
| $T_1E_{l1}$    | 79.04    | 0.458       |                |          |                       |
| $E_{l1}^2$     | 679.143  | -9.708      |                |          |                       |
| $E_{l1}$       | 355.655  | 80.793      |                |          |                       |
| $T_2E_{l2}$    | 19.028   | 0.0885      |                |          |                       |
| $T_1V_{u1}$    | 39.661   | -0.327      |                |          |                       |
| $V_{u1}$       | 31.615   | 8.803       |                |          |                       |
| $E_{u1}$       | 57.628   | 12.301      |                |          |                       |
| $T_2E_{u1}$    | 53.795   | -0.395      |                |          |                       |
| $T_2E_{l1}$    | 27.31    | 0.181       |                |          |                       |
| $E_{l2}E_{l1}$ | 8.169    | -0.342      |                |          |                       |
|                |          |             | 0.860          | 0.983    | 0.966                 |

**Table S3.27.** Results of Step 11 in the fitting of the total acetic acid production in the two-bioreactor system.

| Terms added    | <i>F</i> | Coefficient | Standard error | <i>R</i> | <i>R</i> <sup>2</sup> |
|----------------|----------|-------------|----------------|----------|-----------------------|
| Constant       |          | -240.827    |                |          |                       |
| $T_1E_{l1}$    | 82.379   | 0.67        |                |          |                       |
| $E_{l1}^2$     | 872.78   | -9.708      |                |          |                       |
| $E_{l1}$       | 331.778  | 74.894      |                |          |                       |
| $T_2E_{l2}$    | 30.908   | 0.101       |                |          |                       |
| $T_1V_{u1}$    | 53.475   | -0.534      |                |          |                       |
| $V_{u1}$       | 39.664   | 17.749      |                |          |                       |
| $E_{u1}$       | 78.115   | 16.969      |                |          |                       |
| $T_2E_{u1}$    | 70.463   | -0.399      |                |          |                       |
| $T_2E_{l1}$    | 32.527   | 0.175       |                |          |                       |
| $E_{l2}E_{l1}$ | 15.018   | -0.416      |                |          |                       |
| $E_{u1}V_{u1}$ | 13.26    | -0.91       |                |          |                       |
|                |          |             | 0.759          | 0.987    | 0.975                 |

**Table S3.28.** Results of Step 12 in the fitting of the total acetic acid production in the two-bioreactor system.

| Terms added     | <i>F</i> | Coefficient | Standard error | <i>R</i> | <i>R</i> <sup>2</sup> |
|-----------------|----------|-------------|----------------|----------|-----------------------|
| Constant        |          | -243.705    |                |          |                       |
| $T_1 E_{l1}$    | 92.918   | 0.742       |                |          |                       |
| $E_{l1}^2$      | 961.793  | -9.708      |                |          |                       |
| $E_{l1}$        | 326.099  | 72.736      |                |          |                       |
| $T_2 E_{l2}$    | 34.06    | 0.101       |                |          |                       |
| $T_1 V_{u1}$    | 58.929   | -0.534      |                |          |                       |
| $V_{u1}$        | 46.188   | 18.324      |                |          |                       |
| $E_{u1}$        | 63.689   | 21.525      |                |          |                       |
| $T_2 E_{u1}$    | 77.65    | -0.399      |                |          |                       |
| $T_2 E_{l1}$    | 35.845   | 0.175       |                |          |                       |
| $E_{l2} E_{l1}$ | 16.55    | -0.416      |                |          |                       |
| $E_{u1} V_{u1}$ | 19.078   | -1.102      |                |          |                       |
| $T_1 E_{u1}$    | 5.284    | -0.12       |                |          |                       |
|                 |          |             | 0.723          | 0.989    | 0.977                 |

Beyond this point, no term had  $F > F_{\text{to-enter}}$  so the polynomial was not further expanded and the fitting process was finished. The final polynomial is that of eq. 2 of the manuscript.

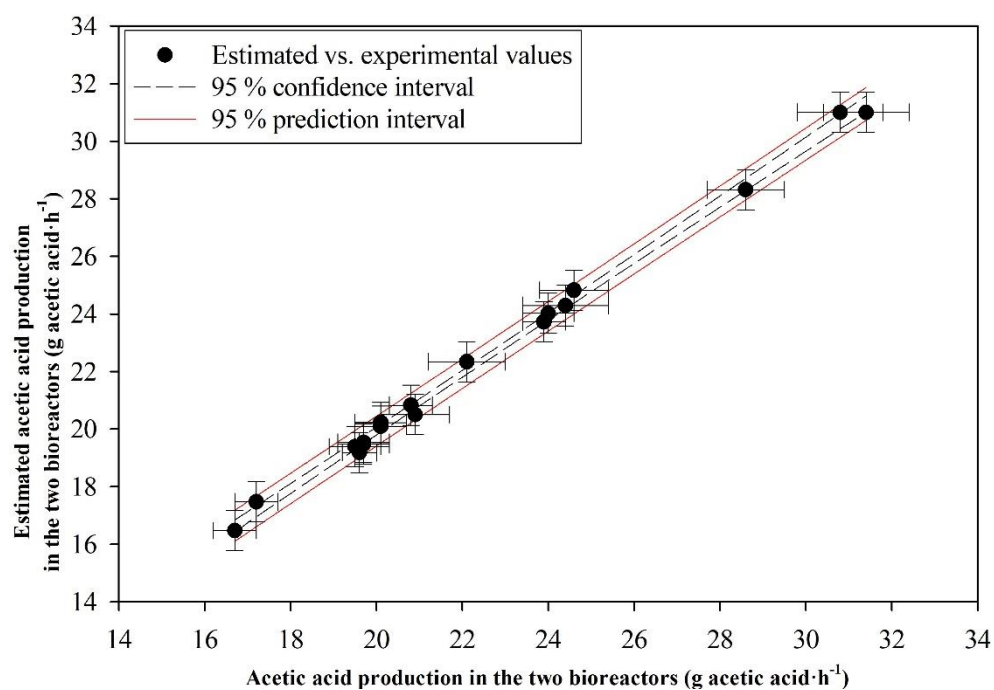**Figure S3.3.** Plot of  $P_{m\ est}$  against  $P_m$  and curves for the 95% confidence and prediction intervals.

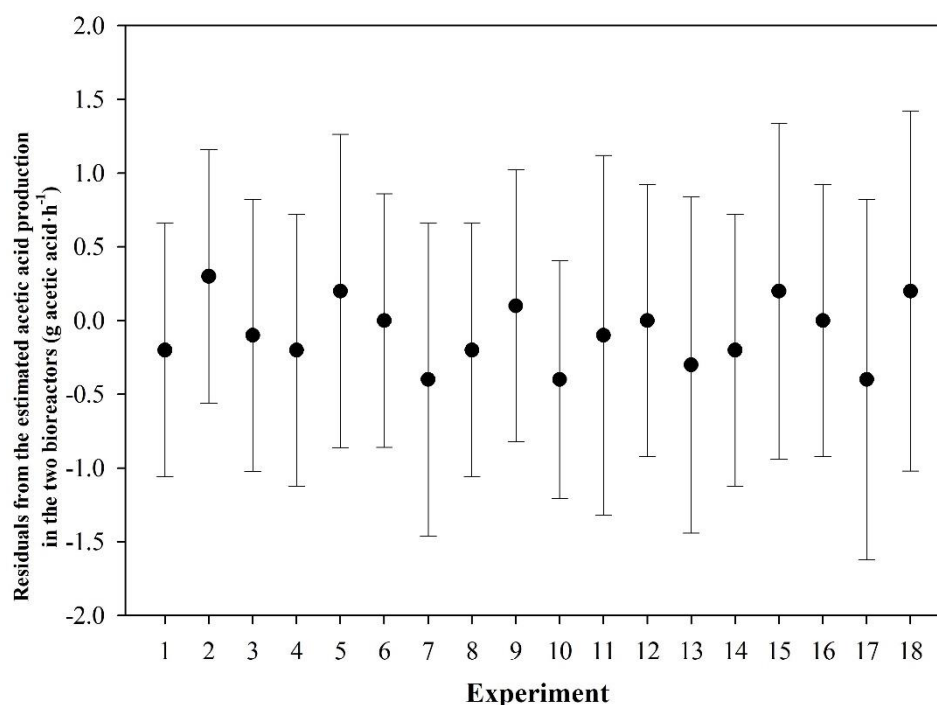

Figure S3.4. Residuals of the fitting of  $P_{m\ est}$  for each experiment.

### S3.3. Final ethanol concentration at the time the second reactor was unloaded

The experimental results of the ANOVA on this variable are shown in Table S3.29.

Table S3.29. Results of the ANOVA on the final ethanol concentration at the time the second reactor was unloaded.

| Source of variability | Degrees of freedom | Variance | <i>F</i> | <i>P-value</i> |
|-----------------------|--------------------|----------|----------|----------------|
| Group                 | 17                 | 21.36    | 545.372  | <0.001         |
| Sample                | 144                | 0.0392   |          |                |
| Total                 | 161                |          |          |                |

The *F* value at the 95% confidence level was greater than the corresponding critical point ( $F_{crit} = 1.623$ ), so there were statistically significant differences between experimental means ( $P\text{-value} < 0.001$ ).

The Forward Stepwise Regression method was applied. *F*-to-enter was set at 4 and *F*-to-remove at 3.9. Tables S3.30 to S3.41 show the results of each step. The terms added in each step are shown in successive rows in each table.

Table S3.30. Results of Step 0 in the fitting of the final ethanol concentration at the time the second reactor was unloaded.

| Terms added | Coefficient | Standard error |
|-------------|-------------|----------------|
| Constant    | 1.329       | 0.202          |

Table S3.31. Results of Step 1 in the fitting of the final ethanol concentration at the time the second reactor was unloaded.

| Terms added | <i>F</i> | Coefficient | Standard error | <i>R</i> | <i>R</i> <sup>2</sup> |
|-------------|----------|-------------|----------------|----------|-----------------------|
| Constant    | 8.834    |             |                |          |                       |
| $T_2V_{u1}$ | 86.921   | -0.05       | 0.917          | 0.791    | 0.626                 |

**Table S3.32.** Results of Step 2 in the fitting of the final ethanol concentration at the time the second reactor was unloaded.

| Terms added    | <i>F</i> | Coefficient | Standard error | <i>R</i> | <i>R</i> <sup>2</sup> |
|----------------|----------|-------------|----------------|----------|-----------------------|
| Constant       |          | 8.01        |                |          |                       |
| $T_2V_{u1}$    | 102.461  | -0.0502     |                |          |                       |
| $E_{l2}E_{u1}$ | 9.819    | 0.0813      |                |          |                       |
|                |          |             | 0.848          | 0.828    | 0.686                 |

**Table S3.33.** Results of Step 3 in the fitting of the final ethanol concentration at the time the second reactor was unloaded.

| Terms added    | <i>F</i> | Coefficient | Standard error | <i>R</i> | <i>R</i> <sup>2</sup> |
|----------------|----------|-------------|----------------|----------|-----------------------|
| Constant       |          | 7.658       |                |          |                       |
| $T_2V_{u1}$    | 63.213   | -0.0415     |                |          |                       |
| $E_{l2}E_{u1}$ | 22.903   | 0.143       |                |          |                       |
| $E_{l2}V_{u1}$ | 11.42    | -0.092      |                |          |                       |
|                |          |             | 0.773          | 0.863    | 0.744                 |

**Table S3.34.** Results of Step 4 in the fitting of the final ethanol concentration at the time the second reactor was unloaded.

| Terms added    | <i>F</i> | Coefficient | Standard error | <i>R</i> | <i>R</i> <sup>2</sup> |
|----------------|----------|-------------|----------------|----------|-----------------------|
| Constant       |          | 6.045       |                |          |                       |
| $T_2V_{u1}$    | 3.733    | -0.0122     |                |          |                       |
| $E_{l2}E_{u1}$ | 67.914   | 0.391       |                |          |                       |
| $E_{l2}V_{u1}$ | 54.156   | -0.222      |                |          |                       |
| $E_{u1}V_{u1}$ | 35.72    | -0.207      |                |          |                       |
|                |          |             | 0.594          | 0.923    | 0.852                 |

$T_2V_{u1}$  must be removed from the model in the next step.

**Table S3.35.** Results of Step 5 in the fitting of the final ethanol concentration at the time the second reactor was unloaded.

| Terms added    | <i>F</i> | Coefficient | Standard error | <i>R</i> | <i>R</i> <sup>2</sup> |
|----------------|----------|-------------|----------------|----------|-----------------------|
| Constant       |          | 5.043       |                |          |                       |
| $E_{l2}E_{l1}$ | 218.352  | 0.462       |                |          |                       |
| $E_{l2}V_{u1}$ | 187.843  | -0.268      |                |          |                       |
| $E_{u1}V_{u1}$ | 131.888  | -0.258      |                |          |                       |
|                |          |             | 0.610          | 0.917    | 0.841                 |

**Table S3.36.** Results of Step 6 in the fitting of the final ethanol concentration at the time the second reactor was unloaded.

| Terms added    | <i>F</i> | Coefficient | Standard error | <i>R</i> | <i>R</i> <sup>2</sup> |
|----------------|----------|-------------|----------------|----------|-----------------------|
| Constant       |          | 7.08        |                |          |                       |
| $E_{l2}E_{u1}$ | 282.269  | 0.637       |                |          |                       |
| $E_{l2}V_{u1}$ | 25.252   | -0.135      |                |          |                       |
| $E_{u1}V_{u1}$ | 200.501  | -0.382      |                |          |                       |
| $T_2E_{l2}$    | 35.656   | -0.0414     |                |          |                       |
|                |          |             | 0.469          | 0.953    | 0.908                 |

**Table S3.37.** Results of Step 7 in the fitting of the final ethanol concentration at the time the second reactor was unloaded.

| Terms added    | F       | Coefficient | Standard error | R     | R <sup>2</sup> |
|----------------|---------|-------------|----------------|-------|----------------|
| Constant       |         | 7.048       |                |       |                |
| $E_{l2}E_{u1}$ | 81.703  | 0.462       |                |       |                |
| $E_{l2}V_{u1}$ | 0.197   | -0.0157     |                |       |                |
| $E_{u1}V_{u1}$ | 159.136 | -0.542      |                |       |                |
| $T_2E_{l2}$    | 53.649  | -0.0434     |                |       |                |
| $E_{u1}^2$     | 19.464  | 0.242       |                |       |                |
|                |         |             | 0.399          | 0.967 | 0.935          |

$E_{l2}V_{u1}$  must be removed from the model in the next step.

**Table S3.38.** Results of Step 8 in the fitting of the final ethanol concentration at the time the second reactor was unloaded.

| Terms added    | F       | Coefficient | Standard error | R     | R <sup>2</sup> |
|----------------|---------|-------------|----------------|-------|----------------|
| Constant       |         | 7.089       |                |       |                |
| $E_{l2}E_{u1}$ | 96.335  | 0.453       |                |       |                |
| $E_{u1}V_{u1}$ | 542.537 | -0.558      |                |       |                |
| $T_2E_{l2}$    | 90.225  | -0.045      |                |       |                |
| $E_{u1}^2$     | 54.936  | 0.261       |                |       |                |
|                |         |             | 0.396          | 0.967 | 0.934          |

**Table S3.39.** Results of Step 9 in the fitting of the final ethanol concentration at the time the second reactor was unloaded.

| Terms added    | F       | Coefficient | Standard error | R     | R <sup>2</sup> |
|----------------|---------|-------------|----------------|-------|----------------|
| Constant       |         | 13.357      |                |       |                |
| $E_{l2}E_{u1}$ | 171.372 | 0.485       |                |       |                |
| $E_{u1}V_{u1}$ | 810.614 | -0.545      |                |       |                |
| $T_2E_{l2}$    | 160.166 | -0.0481     |                |       |                |
| $E_{u1}^2$     | 52.77   | 0.988       |                |       |                |
| $E_{u1}$       | 29.857  | -4.557      |                |       |                |
|                |         |             | 0.314          | 0.980 | 0.959          |

**Table S3.40.** Results of Step 10 in the fitting of the final ethanol concentration at the time the second reactor was unloaded.

| Terms added    | F       | Coefficient | Standard error | R     | R <sup>2</sup> |
|----------------|---------|-------------|----------------|-------|----------------|
| Constant       |         | 13.928      |                |       |                |
| $E_{l2}E_{u1}$ | 194.067 | 0.488       |                |       |                |
| $E_{u1}V_{u1}$ | 546.045 | -0.513      |                |       |                |
| $T_2E_{l2}$    | 181.617 | -0.0484     |                |       |                |
| $E_{u1}^2$     | 59.082  | 0.988       |                |       |                |
| $E_{u1}$       | 35.746  | -4.729      |                |       |                |
| $E_{l1}V_{u1}$ | 6.741   | -0.0214     |                |       |                |
|                |         |             | 0.297          | 0.982 | 0.965          |

**Table S3.41.** Results of Step 11 in the fitting of the final ethanol concentration at the time the second reactor was unloaded.

| Terms added    | <i>F</i> | Coefficient | Standard error | <i>R</i> | <i>R</i> <sup>2</sup> |
|----------------|----------|-------------|----------------|----------|-----------------------|
| Constant       |          | 14.935      |                |          |                       |
| $E_{l2}E_{u1}$ | 211.593  | 0.494       |                |          |                       |
| $E_{u1}V_{u1}$ | 176.42   | -0.456      |                |          |                       |
| $T_2E_{l2}$    | 198.342  | -0.049      |                |          |                       |
| $E_{u1}^2$     | 63.383   | 0.988       |                |          |                       |
| $E_{u1}$       | 42.65    | -5.371      |                |          |                       |
| $E_{l1}V_{u1}$ | 9.078    | -0.0592     |                |          |                       |
| $E_{u1}E_{l1}$ | 4.422    | 0.0678      |                |          |                       |
|                |          |             | 0.287          | 0.984    | 0.968                 |

Beyond this point, no term had  $F > F$ -to-enter so the polynomial was not further expanded and the fitting process was finished. The final polynomial is that of eq. 7 of the manuscript.

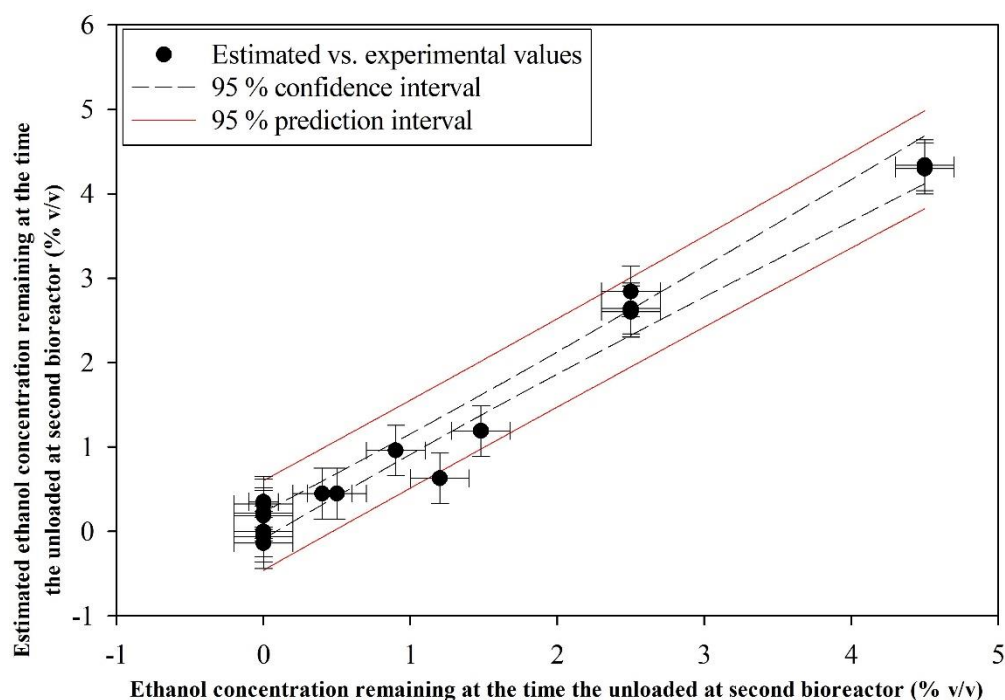**Figure S3.5.** Plot of  $E_{u2 est}$  against  $E_{u2}$  and curves for the 95% confidence and prediction intervals.

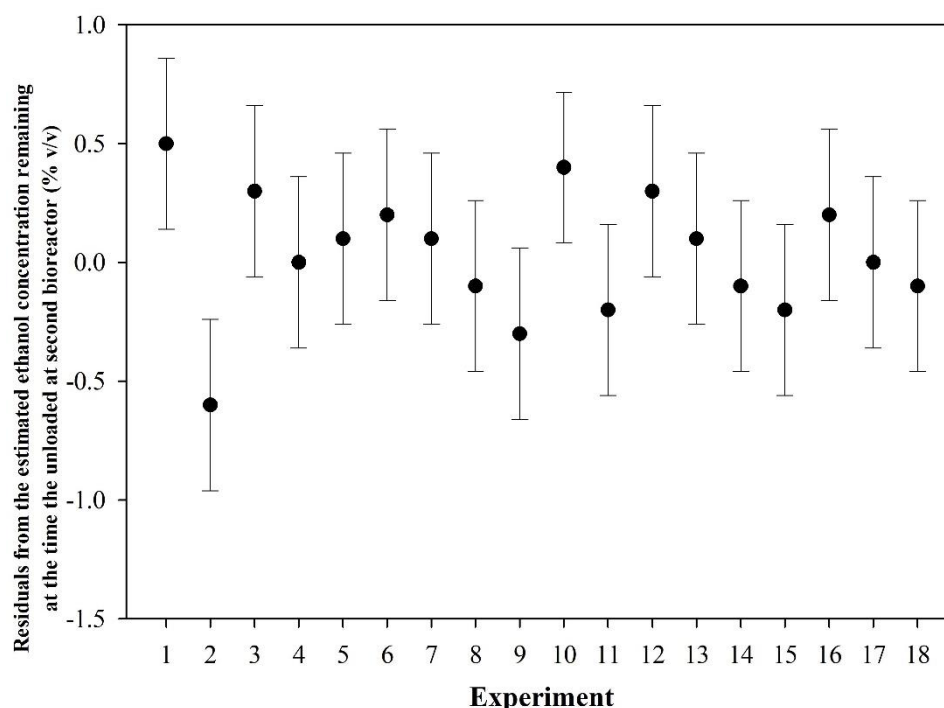

Figure S3.6. Residuals of the fitting of  $E_{u2\ est}$  for each experiment.

### S3.4. Volume of fermentation medium unloaded from the second reactor

The experimental results of the ANOVA on this variable are shown in Table S3.42.

Table S3.42. Results of the ANOVA on the volume of fermentation medium unloaded from the second reactor.

| Source of variability | Degrees of freedom | Variance | <i>F</i> | <i>P-value</i> |
|-----------------------|--------------------|----------|----------|----------------|
| Group                 | 17                 | 10.6     | 4240.012 | <0.001         |
| Sample                | 144                | 0.0025   |          |                |
| Total                 | 161                |          |          |                |

The *F* value at the 95% confidence level was greater than the corresponding critical point ( $F_{crit} = 1.623$ ), so there were statistically significant differences between experimental means ( $P\text{-value} < 0.001$ ).

The Forward Stepwise Regression method was applied. *F*-to-enter was set at 4 and *F*-to-remove at 3.9. Tables S3.43 to S3.53 show the results of each step. The terms added in each step are shown in successive rows in each table.

Table S3.43. Results of Step 0 in the fitting of the volume of fermentation medium unloaded from the second reactor.

| Terms added | Coefficient | Standard error |
|-------------|-------------|----------------|
| Constant    | 7.449       | 1.038          |

Table S3.44. Results of Step 1 in the fitting of the volume of fermentation medium unloaded from the second reactor.

| Terms added | <i>F</i> | Coefficient | Standard error | <i>R</i> | <i>R</i> <sup>2</sup> |
|-------------|----------|-------------|----------------|----------|-----------------------|
| Constant    |          | 3.316       |                |          |                       |
| $V_{u1}$    | 24.842   | 0.827       | 0.862          | 0.569    | 0.323                 |

**Table S3.45.** Results of Step 2 in the fitting of the volume of fermentation medium unloaded from the second reactor.

| Terms added | <i>F</i> | Coefficient | Standard error | <i>R</i> | <i>R</i> <sup>2</sup> |
|-------------|----------|-------------|----------------|----------|-----------------------|
| Constant    |          | 4.884       |                |          |                       |
| $V_{u1}$    | 37.758   | 0.827       |                |          |                       |
| $T_2E_{u1}$ | 28.037   | -0.0174     |                |          |                       |
|             |          |             | 0.699          | 0.751    | 0.563                 |

**Table S3.46.** Results of Step 3 in the fitting of the volume of fermentation medium unloaded from the second reactor.

| Terms added    | <i>F</i> | Coefficient | Standard error | <i>R</i> | <i>R</i> <sup>2</sup> |
|----------------|----------|-------------|----------------|----------|-----------------------|
| Constant       |          | 9.482       |                |          |                       |
| $V_{u1}$       | 0.348    | -0.134      |                |          |                       |
| $T_2E_{u1}$    | 39.824   | -0.0685     |                |          |                       |
| $E_{u1}V_{u1}$ | 23.648   | 0.32        |                |          |                       |
|                |          |             | 0.582          | 0.839    | 0.704                 |

$V_{u1}$  must be removed in the next step.

**Table S3.47.** Results of Step 4 in the fitting of the volume of fermentation medium unloaded from the second reactor.

| Terms added    | <i>F</i> | Coefficient | Standard error | <i>R</i> | <i>R</i> <sup>2</sup> |
|----------------|----------|-------------|----------------|----------|-----------------------|
| Constant       |          | 8.834       |                |          |                       |
| $T_2E_{u1}$    | 117.561  | -0.0631     |                |          |                       |
| $E_{u1}V_{u1}$ | 78.835   | 0.286       |                |          |                       |
|                |          |             | 0.578          | 0.838    | 0.701                 |

**Table S3.48.** Results of Step 5 in the fitting of the volume of fermentation medium unloaded from the second reactor.

| Terms added    | <i>F</i> | Coefficient | Standard error | <i>R</i> | <i>R</i> <sup>2</sup> |
|----------------|----------|-------------|----------------|----------|-----------------------|
| Constant       |          | 7.678       |                |          |                       |
| $T_2E_{u1}$    | 186.114  | -0.0651     |                |          |                       |
| $E_{u1}V_{u1}$ | 125.159  | 0.295       |                |          |                       |
| $T_2E_{l2}$    | 26.506   | 0.0114      |                |          |                       |
|                |          |             | 0.472          | 0.897    | 0.805                 |

**Table S3.49.** Results of Step 6 in the fitting of the volume of fermentation medium unloaded from the second reactor.

| Terms added    | <i>F</i> | Coefficient | Standard error | <i>R</i> | <i>R</i> <sup>2</sup> |
|----------------|----------|-------------|----------------|----------|-----------------------|
| Constant       |          | 7.732       |                |          |                       |
| $T_2E_{u1}$    | 215.749  | -0.0963     |                |          |                       |
| $E_{u1}V_{u1}$ | 157.405  | 0.484       |                |          |                       |
| $T_2E_{l2}$    | 56.335   | 0.043       |                |          |                       |
| $E_{l2}V_{u1}$ | 33.476   | -0.194      |                |          |                       |
|                |          |             | 0.367          | 0.940    | 0.884                 |

**Table S3.50.** Results of Step 7 in the fitting of the volume of fermentation medium unloaded from the second reactor.

| Terms added    | F       | Coefficient | Standard error | R     | R <sup>2</sup> |
|----------------|---------|-------------|----------------|-------|----------------|
| Constant       |         | 6.648       |                |       |                |
| $T_2E_{u1}$    | 76.668  | -0.0723     |                |       |                |
| $E_{u1}V_{u1}$ | 222.462 | 0.528       |                |       |                |
| $T_2E_{l2}$    | 77.567  | 0.0442      |                |       |                |
| $E_{l2}V_{u1}$ | 49.889  | -0.208      |                |       |                |
| $E_{u1}^2$     | 16.285  | -0.162      |                |       |                |
|                |         |             | 0.321          | 0.956 | 0.913          |

**Table S3.51.** Results of Step 8 in the fitting of the volume of fermentation medium unloaded from the second reactor.

| Terms added    | F       | Coefficient | Standard error | R     | R <sup>2</sup> |
|----------------|---------|-------------|----------------|-------|----------------|
| Constant       |         | 7.002       |                |       |                |
| $T_2E_{u1}$    | 81.732  | -0.0591     |                |       |                |
| $E_{u1}V_{u1}$ | 432.552 | 0.566       |                |       |                |
| $T_2E_{l2}$    | 46.76   | 0.03        |                |       |                |
| $E_{l2}V_{u1}$ | 114.168 | -0.244      |                |       |                |
| $E_{u1}^2$     | 67.625  | -0.376      |                |       |                |
| $E_{l2}E_{u1}$ | 38.587  | 0.202       |                |       |                |
|                |         |             | 0.240          | 0.976 | 0.952          |

**Table S3.52.** Results of Step 9 in the fitting of the volume of fermentation medium unloaded from the second reactor.

| Terms added    | F       | Coefficient | Standard error | R     | R <sup>2</sup> |
|----------------|---------|-------------|----------------|-------|----------------|
| Constant       |         | 4.639       |                |       |                |
| $T_2E_{u1}$    | 2.596   | -0.0227     |                |       |                |
| $E_{u1}V_{u1}$ | 240.098 | 0.665       |                |       |                |
| $T_2E_{l2}$    | 0.137   | -0.00472    |                |       |                |
| $E_{l2}V_{u1}$ | 77.85   | -0.334      |                |       |                |
| $E_{u1}^2$     | 42.361  | -0.622      |                |       |                |
| $E_{l2}E_{u1}$ | 27.722  | 0.17        |                |       |                |
| $E_{l2}$       | 8.244   | 1.593       |                |       |                |
|                |         |             | 0.224          | 0.980 | 0.960          |

$T_2E_{l2}$  must be removed in the next step.

**Table S3.53.** Results of Step 10 in the fitting of the volume of fermentation medium unloaded from the second reactor.

| Terms added    | F       | Coefficient | Standard error | R     | R <sup>2</sup> |
|----------------|---------|-------------|----------------|-------|----------------|
| Constant       |         | 4.921       |                |       |                |
| $T_2E_{u1}$    | 31.037  | -0.0275     |                |       |                |
| $E_{u1}V_{u1}$ | 421.63  | 0.665       |                |       |                |
| $E_{l2}V_{u1}$ | 134.502 | -0.324      |                |       |                |
| $E_{u1}^2$     | 203.249 | -0.59       |                |       |                |
| $E_{l2}E_{u1}$ | 29.82   | 0.172       |                |       |                |
| $E_{l2}$       | 63.235  | 1.399       |                |       |                |
|                |         |             | 0.222          | 0.980 | 0.960          |

Beyond this point, no term had  $F > F$ -to-enter so the polynomial was not further expanded and the fitting process was finished. The final polynomial is that of eq. 8 of the manuscript.

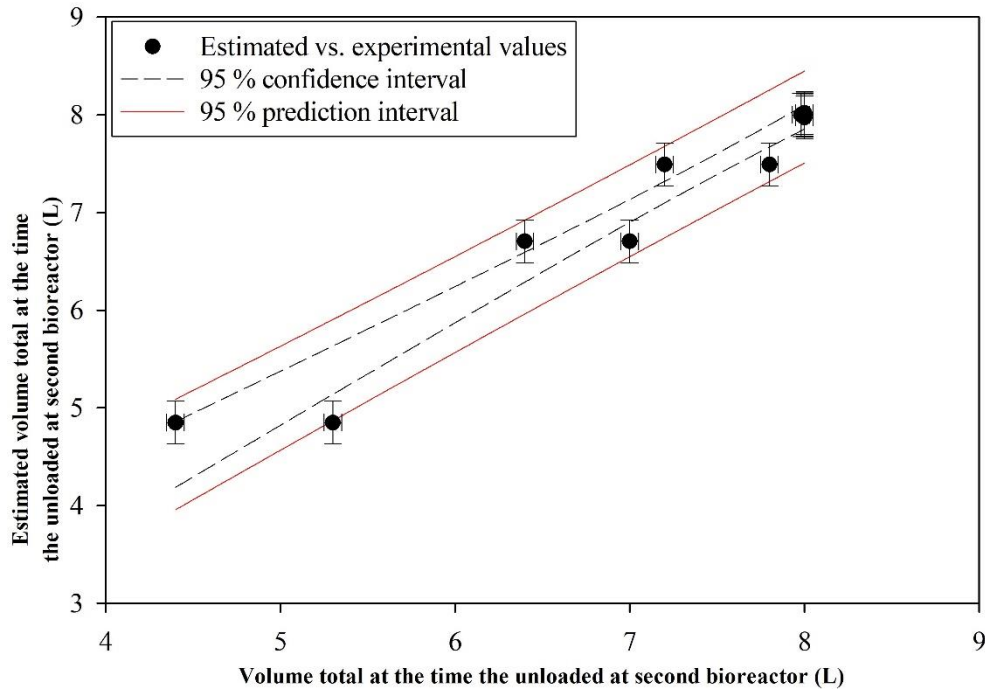

Figure S3.7. Plot of  $V_{u2 est}$  against  $V_{u2}$  and curves for the 95% confidence and prediction intervals.

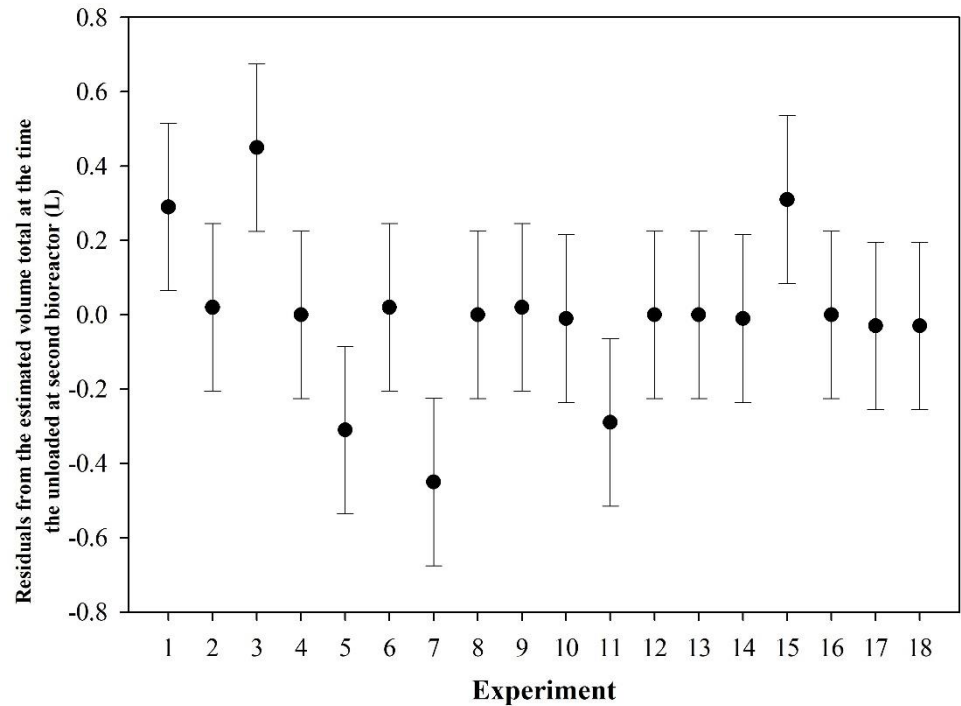

Figure S3.8. Residuals of the fitting of  $V_{u2 est}$  for each experiment.

### S3.5. Total cycle duration

The experimental results of the ANOVA on this variable are shown in Table S3.54.

Table S3.54. Results of the ANOVA on the total cycle duration.

| Source of variability | Degrees of freedom | Variance | $F$ | $P$ -value |
|-----------------------|--------------------|----------|-----|------------|
|-----------------------|--------------------|----------|-----|------------|

|        |     |         |          |        |
|--------|-----|---------|----------|--------|
| Group  | 17  | 931.949 | 1456.644 | <0.001 |
| Sample | 144 | 0.64    |          |        |
| Total  | 161 |         |          |        |

The  $F$  value at the 95% confidence level was greater than the corresponding critical point ( $F_{\text{crit}} = 1.623$ ), so there were statistically significant differences between experimental means ( $P\text{-value} < 0.001$ ).

The Forward Stepwise Regression method was applied.  $F$ -to-enter was set at 4 and  $F$ -to-remove at 3.9. Tables S3.55 to S3.60 show the results of each step. The terms added in each step are shown in successive rows in each table.

**Table S3.55.** Results of Step 0 in the fitting of the total cycle duration.

| Terms added | Coefficient | Standard error |
|-------------|-------------|----------------|
| Constant    | 35.228      | 1.381          |

**Table S3.56.** Results of Step 1 in the fitting of the total cycle duration.

| Terms added | $F$    | Coefficient | Standard error | $R$   | $R^2$ |
|-------------|--------|-------------|----------------|-------|-------|
| Constant    |        | 6.512       |                |       |       |
| $V_{u1}^2$  | 87.643 | 1.126       | 6.252          | 0.792 | 0.628 |

**Table S3.57.** Results of Step 2 in the fitting of the total cycle duration.

| Terms added    | $F$     | Coefficient | Standard error | $R$   | $R^2$ |
|----------------|---------|-------------|----------------|-------|-------|
| Constant       |         | 18.78       |                |       |       |
| $V_{u1}^2$     | 192.226 | 1.126       |                |       |       |
| $E_{u1}E_{l1}$ | 63.05   | -0.818      | 4.222          | 0.913 | 0.833 |

**Table S3.58.** Results of Step 3 in the fitting of the total cycle duration.

| Terms added      | $F$    | Coefficient | Standard error | $R$   | $R^2$ |
|------------------|--------|-------------|----------------|-------|-------|
| Constant         |        | 323.69      |                |       |       |
| $V_{u1}^2$       | 23.922 | 13.556      |                |       |       |
| $E_{u1}E_{cul1}$ | 86.694 | -0.818      |                |       |       |
| $V_{u1}$         | 20.125 | -124.372    | 3.600          | 0.939 | 0.881 |

**Table S3.59.** Results of Step 4 in the fitting of the total cycle duration.

| Terms added    | $F$     | Coefficient | Standard error | $R$   | $R^2$ |
|----------------|---------|-------------|----------------|-------|-------|
| Constant       |         | 356.503     |                |       |       |
| $V_{u1}^2$     | 36.313  | 13.556      |                |       |       |
| $E_{u1}E_{l1}$ | 131.599 | -0.818      |                |       |       |
| $V_{u1}$       | 30.55   | -124.372    |                |       |       |
| $T_1$          | 26.898  | -1.094      | 2.922          | 0.961 | 0.923 |

**Table S3.60.** Results of Step 5 in the fitting of the total cycle duration.

| Terms added    | $F$     | Coefficient | Standard error | $R$ | $R^2$ |
|----------------|---------|-------------|----------------|-----|-------|
| Constant       |         | 518.591     |                |     |       |
| $V_{u1}^2$     | 50.123  | 13.556      |                |     |       |
| $E_{u1}E_{l1}$ | 196.913 | -0.864      |                |     |       |
| $V_{u1}$       | 58.441  | -156.652    |                |     |       |

|             |        |        |       |       |       |
|-------------|--------|--------|-------|-------|-------|
| $T_1$       | 27.82  | -6.474 |       |       |       |
| $T_1V_{u1}$ | 19.634 | 1.076  |       |       |       |
|             |        |        | 2.487 | 0.972 | 0.946 |

Beyond this point, no term had  $F > F_{\text{to-enter}}$  so the polynomial was not further expanded and the fitting process was finished. The final polynomial is that of eq. 9 of the manuscript.

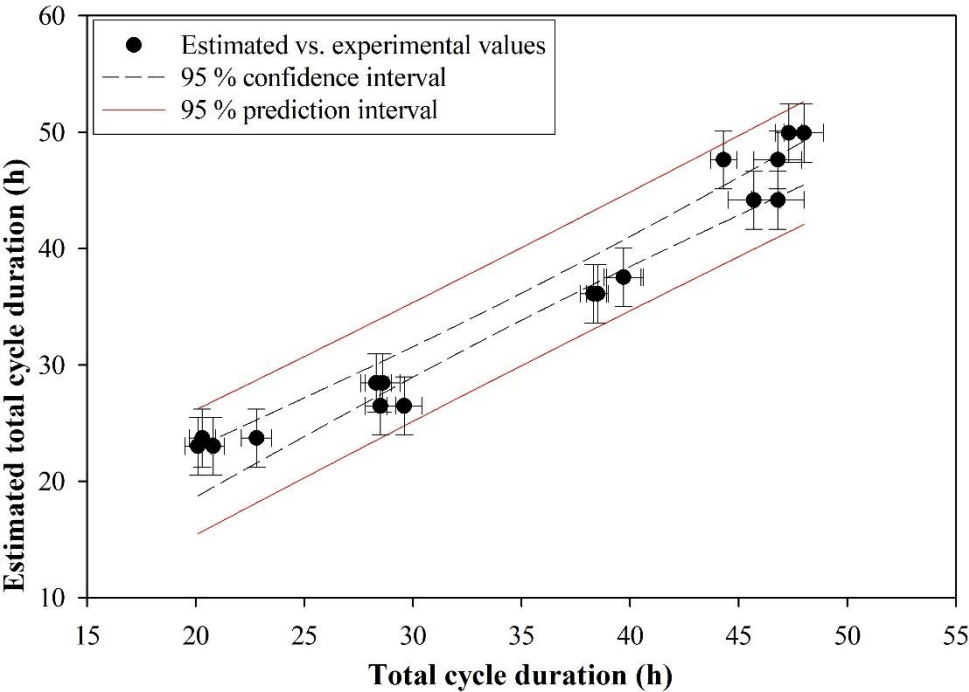

**Figure S3.9.** Plot of  $t_{cycle\ est}$  against  $t_{cycle}$  and curves for the 95% confidence and prediction intervals

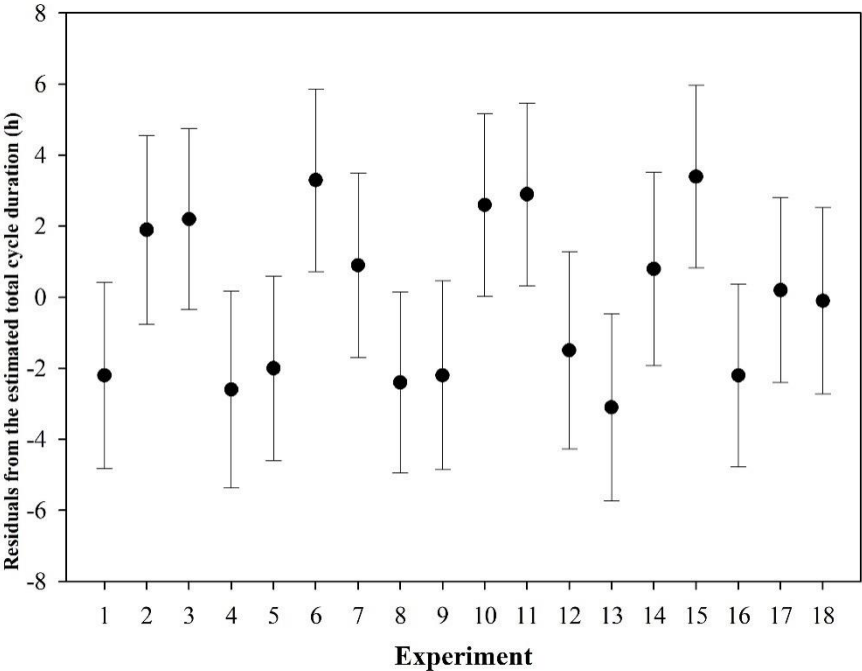

**Figure S3.10.** Residuals of the fitting of  $t_{cycle\ est}$  for each experiment.

**S3.6. Mean overall volume in the two-bioreactor system**

The experimental results of the ANOVA on this variable are shown in Table S3.61.

**Table S3.61.** Results of the ANOVA on the mean overall volume in the two-bioreactor system.

| Source of variability | Degrees of freedom | Variance | F       | P-value |
|-----------------------|--------------------|----------|---------|---------|
| Group                 | 17                 | 15.027   | 105.912 | <0.001  |
| Sample                | 144                | 0.142    |         |         |
| Total                 | 161                |          |         |         |

The  $F$  value at the 95% confidence level was greater than the corresponding critical point ( $F_{\text{crit}} = 1.623$ ), so there were statistically significant differences between experimental means ( $P\text{-value} < 0.001$ ).

The Forward Stepwise Regression method was applied.  $F$ -to-enter was set at 4 and  $F$ -to-remove at 3.9. Tables S3.62 to S3.74 show the results of each step. The terms added in each step are shown in successive rows in each table.

**Table S3.62.** Results of Step 0 in the fitting of the mean overall volume in the two-bioreactor system.

| Terms added | Coefficient | Standard error |
|-------------|-------------|----------------|
| Constant    | 13.197      | 1.255          |

**Table S3.63.** Results of Step 1 in the fitting of the mean overall volume in the two-bioreactor system.

| Terms added | F      | Coefficient | Standard error | R     | R <sup>2</sup> |
|-------------|--------|-------------|----------------|-------|----------------|
| Constant    |        | 14.591      |                |       |                |
| $E_{u1}^2$  | 36.529 | -0.141      | 0.971          | 0.642 | 0.413          |

**Table S3.64.** Results of Step 2 in the fitting of the mean overall volume in the two-bioreactor system.

| Terms added    | F      | Coefficient | Standard error | R     | R <sup>2</sup> |
|----------------|--------|-------------|----------------|-------|----------------|
| Constant       |        | 11.746      |                |       |                |
| $E_{u1}^2$     | 72.053 | -0.141      |                |       |                |
| $E_{l1}V_{u1}$ | 51.568 | 0.114       | 0.691          | 0.841 | 0.708          |

**Table S3.65.** Results of Step 3 in the fitting of the mean overall volume in the two-bioreactor system.

| Terms added    | F       | Coefficient | Standard error | R     | R <sup>2</sup> |
|----------------|---------|-------------|----------------|-------|----------------|
| Constant       |         | 10.179      |                |       |                |
| $E_{u1}^2$     | 121.374 | -0.141      |                |       |                |
| $E_{l1}V_{u1}$ | 86.867  | 0.114       |                |       |                |
| $T_2E_{l2}$    | 35.911  | 0.0149      | 0.533          | 0.911 | 0.830          |

**Table S3.66.** Results of Step 4 in the fitting of the mean overall volume in the two-bioreactor system.

| Terms added    | F       | Coefficient | Standard error | R     | R <sup>2</sup> |
|----------------|---------|-------------|----------------|-------|----------------|
| Constant       |         | 4.46        |                |       |                |
| $E_{u1}^2$     | 16.007  | -0.841      |                |       |                |
| $E_{l1}V_{u1}$ | 104.463 | 0.114       |                |       |                |
| $T_2E_{l2}$    | 43.184  | 0.0149      |                |       |                |
| $E_{u1}$       | 11.128  | 4.215       | 0.486          | 0.928 | 0.861          |

**Table S3.67.** Results of Step 5 in the fitting of the mean overall volume in the two-bioreactor system.

| Terms added | F      | Coefficient | Standard error | R | R <sup>2</sup> |
|-------------|--------|-------------|----------------|---|----------------|
| Constant    |        | 4.918       |                |   |                |
| $E_{u1}^2$  | 17.636 | -0.841      |                |   |                |

|                |        |        |       |       |       |
|----------------|--------|--------|-------|-------|-------|
| $E_{l1}V_{u1}$ | 55.749 | 0.096  |       |       |       |
| $T_2E_{l2}$    | 46.717 | 0.0148 |       |       |       |
| $E_{u1}$       | 9.755  | 3.797  |       |       |       |
| $E_{u1}V_{u1}$ | 5.988  | 0.0835 |       |       |       |
|                |        |        | 0.463 | 0.936 | 0.877 |

**Table S3.68.** Results of Step 6 in the fitting of the mean overall volume in the two-bioreactor system.

| Terms added    | F      | Coefficient | Standard error | R     | R <sup>2</sup> |
|----------------|--------|-------------|----------------|-------|----------------|
| Constant       |        | 10.021      |                |       |                |
| $E_{u1}^2$     | 24.054 | -0.841      |                |       |                |
| $E_{l1}V_{u1}$ | 89.676 | 0.107       |                |       |                |
| $T_2E_{l2}$    | 59.454 | 0.0143      |                |       |                |
| $E_{u1}$       | 4.305  | 2.281       |                |       |                |
| $E_{u1}V_{u1}$ | 25.64  | 0.387       |                |       |                |
| $V_{u1}$       | 18.466 | -1.066      |                |       |                |
|                |        |             | 0.396          | 0.955 | 0.912          |

**Table S3.69.** Results of Step 7 in the fitting of the mean overall volume in the two-bioreactor system.

| Terms added    | F      | Coefficient | Standard error | R     | R <sup>2</sup> |
|----------------|--------|-------------|----------------|-------|----------------|
| Constant       |        | 9.88        |                |       |                |
| $E_{u1}^2$     | 26.752 | -0.841      |                |       |                |
| $E_{l1}V_{u1}$ | 99.736 | 0.107       |                |       |                |
| $T_2E_{l2}$    | 71.916 | 0.0153      |                |       |                |
| $E_{u1}$       | 7.528  | 2.953       |                |       |                |
| $E_{u1}V_{u1}$ | 28.13  | 0.384       |                |       |                |
| $V_{u1}$       | 20.235 | -1.058      |                |       |                |
| $T_2E_{u1}$    | 6.272  | -0.022      |                |       |                |
|                |        |             | 0.376          | 0.960 | 0.922          |

**Table S3.70.** Results of Step 8 in the fitting of the mean overall volume in the two-bioreactor system.

| Terms added    | F      | Coefficient | Standard error | R     | R <sup>2</sup> |
|----------------|--------|-------------|----------------|-------|----------------|
| Constant       |        | 9.189       |                |       |                |
| $E_{u1}^2$     | 29.611 | -0.841      |                |       |                |
| $E_{l1}V_{u1}$ | 32.551 | 0.179       |                |       |                |
| $T_2E_{l2}$    | 19.624 | 0.0328      |                |       |                |
| $E_{u1}$       | 12.147 | 3.739       |                |       |                |
| $E_{u1}V_{u1}$ | 22.285 | 0.337       |                |       |                |
| $V_{u1}$       | 28.098 | -1.28       |                |       |                |
| $T_2E_{u1}$    | 12.859 | -0.0404     |                |       |                |
| $E_{l2}E_{l1}$ | 5.917  | -0.106      |                |       |                |
|                |        |             | 0.357          | 0.965 | 0.931          |

**Table S3.71.** Results of Step 9 in the fitting of the mean overall volume in the two-bioreactor system.

| Terms added    | F      | Coefficient | Standard error | R | R <sup>2</sup> |
|----------------|--------|-------------|----------------|---|----------------|
| Constant       |        | 5.664       |                |   |                |
| $E_{u1}^2$     | 33.801 | -0.841      |                |   |                |
| $E_{l1}V_{u1}$ | 1.182  | 0.0582      |                |   |                |
| $T_2E_{l2}$    | 25.945 | 0.0357      |                |   |                |
| $E_{u1}$       | 20.151 | 4.899       |                |   |                |
| $E_{u1}V_{u1}$ | 24.231 | 0.33        |                |   |                |
| $V_{u1}$       | 4.026  | -0.65       |                |   |                |

|                |       |         |       |       |       |
|----------------|-------|---------|-------|-------|-------|
| $T_2E_{u1}$    | 20.11 | -0.0777 |       |       |       |
| $E_{l2}E_{l1}$ | 9.095 | -0.124  |       |       |       |
| $T_2E_{l1}$    | 7.366 | 0.0229  |       |       |       |
|                |       |         | 0.334 | 0.970 | 0.941 |

$E_{l1}V_{u1}$  must be removed in the next step.

**Table S3.72.** Results of Step 10 in the fitting of the mean overall volume in the two-bioreactor system.

| Terms added    | <i>F</i> | Coefficient | Standard error | <i>R</i> | <i>R</i> <sup>2</sup> |
|----------------|----------|-------------|----------------|----------|-----------------------|
| Constant       |          | 4.635       |                |          |                       |
| $E_{u1}^2$     | 33.665   | -0.841      |                |          |                       |
| $T_2E_{l2}$    | 25.418   | 0.0329      |                |          |                       |
| $E_{u1}$       | 22.641   | 5.116       |                |          |                       |
| $E_{u1}V_{u1}$ | 25.531   | 0.337       |                |          |                       |
| $V_{u1}$       | 3.294    | -0.382      |                |          |                       |
| $T_2E_{u1}$    | 30.906   | -0.0862     |                |          |                       |
| $E_{l2}E_{l1}$ | 7.883    | -0.108      |                |          |                       |
| $T_2E_{l1}$    | 43.166   | 0.0305      |                |          |                       |
|                |          |             | 0.335          | 0.969    | 0.940                 |

$V_{u1}$  must be removed in the next step.

**Table S3.73.** Results of Step 11 in the fitting of the mean overall volume in the two-bioreactor system.

| Terms added    | <i>F</i> | Coefficient | Standard error | <i>R</i> | <i>R</i> <sup>2</sup> |
|----------------|----------|-------------|----------------|----------|-----------------------|
| Constant       |          | 2.426       |                |          |                       |
| $E_{u1}^2$     | 32.065   | -0.841      |                |          |                       |
| $T_2E_{l2}$    | 30.616   | 0.0358      |                |          |                       |
| $E_{u1}$       | 33.394   | 5.87        |                |          |                       |
| $E_{u1}V_{u1}$ | 112.22   | 0.222       |                |          |                       |
| $T_2E_{u1}$    | 35.198   | -0.0922     |                |          |                       |
| $E_{l2}E_{l1}$ | 10.64    | -0.124      |                |          |                       |
| $T_2E_{l1}$    | 48.891   | 0.0324      |                |          |                       |
|                |          |             | 0.343          | 0.967    | 0.935                 |

**Table S3.74.** Results of Step 12 in the fitting of the mean overall volume in the two-bioreactor system.

| Terms added    | <i>F</i> | Coefficient | Standard error | <i>R</i> | <i>R</i> <sup>2</sup> |
|----------------|----------|-------------|----------------|----------|-----------------------|
| Constant       |          | 4.306       |                |          |                       |
| $E_{u1}^2$     | 34.441   | -0.841      |                |          |                       |
| $T_2E_{l2}$    | 32.872   | 0.0358      |                |          |                       |
| $E_{u1}$       | 17.949   | 4.739       |                |          |                       |
| $E_{u1}V_{u1}$ | 33.616   | 0.336       |                |          |                       |
| $T_2E_{u1}$    | 17.742   | -0.0735     |                |          |                       |
| $E_{l2}E_{l1}$ | 11.523   | -0.125      |                |          |                       |
| $T_2E_{l1}$    | 53.134   | 0.0326      |                |          |                       |
| $T_2V_{u1}$    | 4.408    | -0.0127     |                |          |                       |
|                |          |             | 0.331          | 0.970    | 0.941                 |

Beyond this point, no term had  $F > F$ -to-enter so the polynomial was not further expanded and the fitting process was finished. The final polynomial is that of eq. 10 of the manuscript.

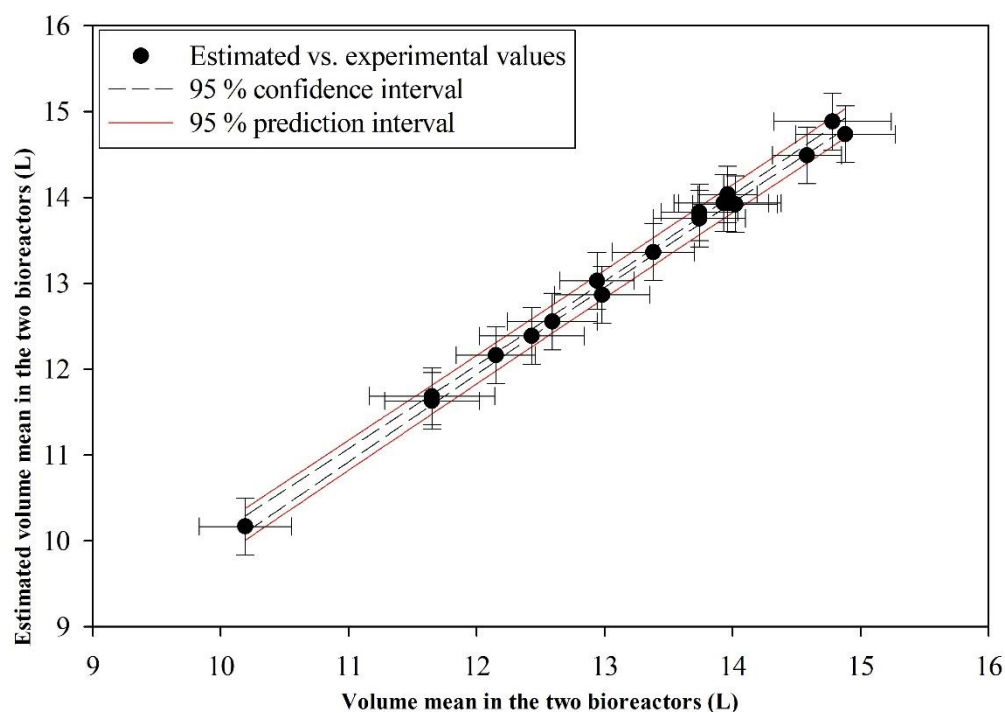

Figure S3.11. Plot of  $V_{m\ est}$  against  $V_m$  and curves for the 95% confidence and prediction intervals.

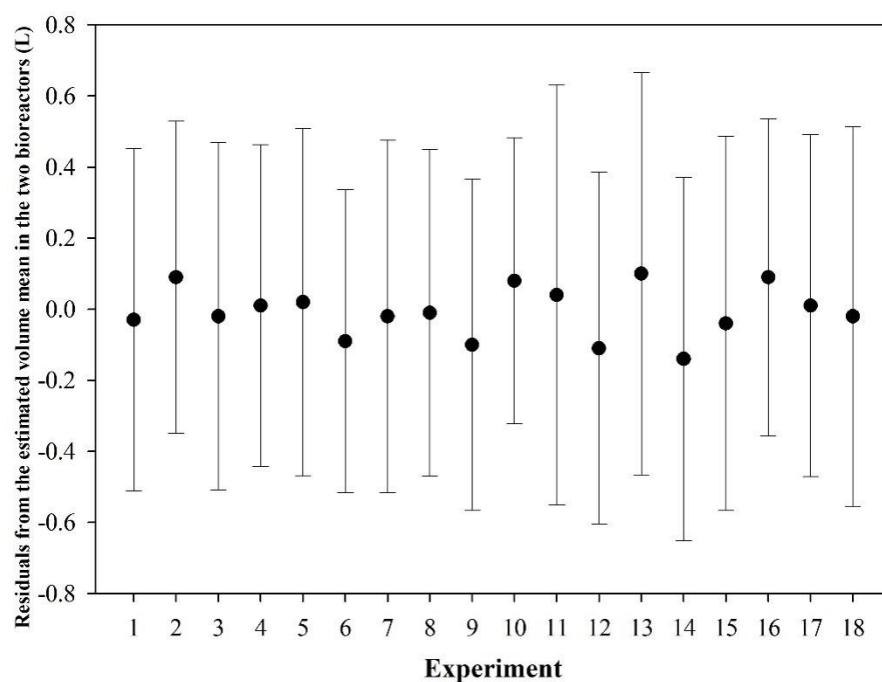

Figure S3.12. Residuals of the fitting of  $V_{m\ est}$  for each experiment

### S3.7. Mean ethanol concentration in the first bioreactor

The experimental results of the ANOVA on this variable are shown in Table S3.75.

Table S3.75. Results of the ANOVA on the mean ethanol concentration in the first bioreactor.

| Source of variability | Degrees of freedom | Variance | <i>F</i> | <i>P-value</i> |
|-----------------------|--------------------|----------|----------|----------------|
| Group                 | 17                 | 3.957    | 89.301   | <0.001         |
| Sample                | 144                | 0.0443   |          |                |
| Total                 | 161                |          |          |                |

The  $F$  value at the 95% confidence level was greater than the corresponding critical point ( $F_{\text{crit}} = 1.623$ ), so there were statistically significant differences between experimental means ( $P\text{-value} < 0.001$ ).

The Forward Stepwise Regression method was applied.  $F$ -to-enter was set at 4 and  $F$ -to-remove at 3.9. Tables S3.76 to S3.81 show the results of each step. The terms added in each step are shown in successive rows in each table.

**Table S3.76.** Results of Step 0 in the fitting of the mean ethanol concentration in the first bioreactor.

| Terms added | Coefficient | Standard error |
|-------------|-------------|----------------|
| Constant    | 4.494       | 0.713          |

**Table S3.77.** Results of Step 1 in the fitting of the mean ethanol concentration in the first bioreactor.

| Terms added | $F$     | Coefficient | Standard error | $R$   | $R^2$ |
|-------------|---------|-------------|----------------|-------|-------|
| Constant    |         | 1.401       |                |       |       |
| $E_{l1}$    | 111.747 | 0.619       | 0.406          | 0.826 | 0.682 |

**Table S3.78.** Results of Step 2 in the fitting of the mean ethanol concentration in the first bioreactor.

| Terms added    | $F$     | Coefficient | Standard error | $R$   | $R^2$ |
|----------------|---------|-------------|----------------|-------|-------|
| Constant       |         | 1.401       |                |       |       |
| $E_{l1}$       | 111.404 | 0.415       |                |       |       |
| $E_{u1}E_{l1}$ | 103.843 | 0.0678      | 0.235          | 0.946 | 0.895 |

**Table S3.79.** Results of Step 3 in the fitting of the mean ethanol concentration in the first bioreactor.

| Terms added    | $F$    | Coefficient | Standard error | $R$   | $R^2$ |
|----------------|--------|-------------|----------------|-------|-------|
| Constant       |        | 2.372       |                |       |       |
| $E_{l1}$       | 0.689  | 0.0755      |                |       |       |
| $E_{u1}E_{l1}$ | 39.887 | 0.181       |                |       |       |
| $E_{u1}^2$     | 16.287 | -0.0982     | 0.206          | 0.960 | 0.921 |

$E_{l1}$  must be removed in the next step.

**Table S3.80.** Results of Step 4 in the fitting of the mean ethanol concentration in the first bioreactor.

| Terms added    | $F$     | Coefficient | Standard error | $R$   | $R^2$ |
|----------------|---------|-------------|----------------|-------|-------|
| Constant       |         | 2.597       |                |       |       |
| $E_{u1}E_{l1}$ | 474.589 | 0.204       |                |       |       |
| $E_{u1}^2$     | 161.378 | -0.117      | 0.206          | 0.959 | 0.920 |

**Table S3.81.** Results of Step 5 in the fitting of the mean ethanol concentration in the first bioreactor.

| Terms added    | $F$     | Coefficient | Standard error | $R$   | $R^2$ |
|----------------|---------|-------------|----------------|-------|-------|
| Constant       |         | 2.312       |                |       |       |
| $E_{u1}E_{l1}$ | 174.929 | 0.175       |                |       |       |
| $E_{u1}^2$     | 61.047  | -0.0932     |                |       |       |
| $E_{l1}V_{u1}$ | 8.218   | 0.0191      | 0.192          | 0.965 | 0.931 |

Beyond this point, no term had  $F > F$ -to-enter so the polynomial was not further expanded and the fitting process was finished. The final polynomial is that of eq. 11 of the manuscript.

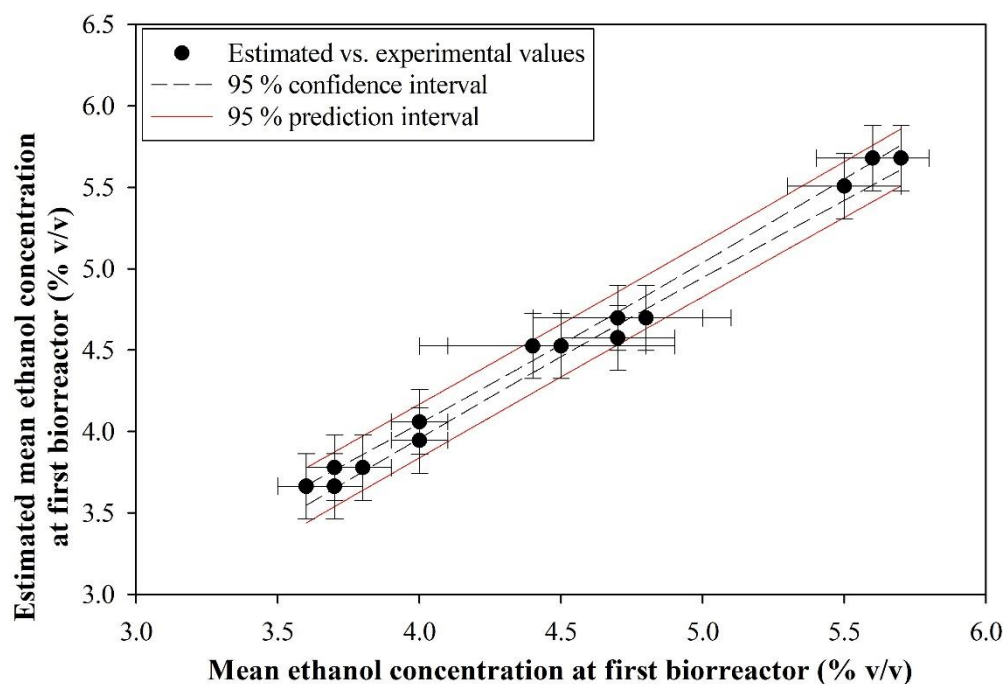

Figure S3.13. Plot of  $EtOH_{m1 est}$  against  $EtOH_{m1}$  and curves for the 95% confidence and prediction intervals.

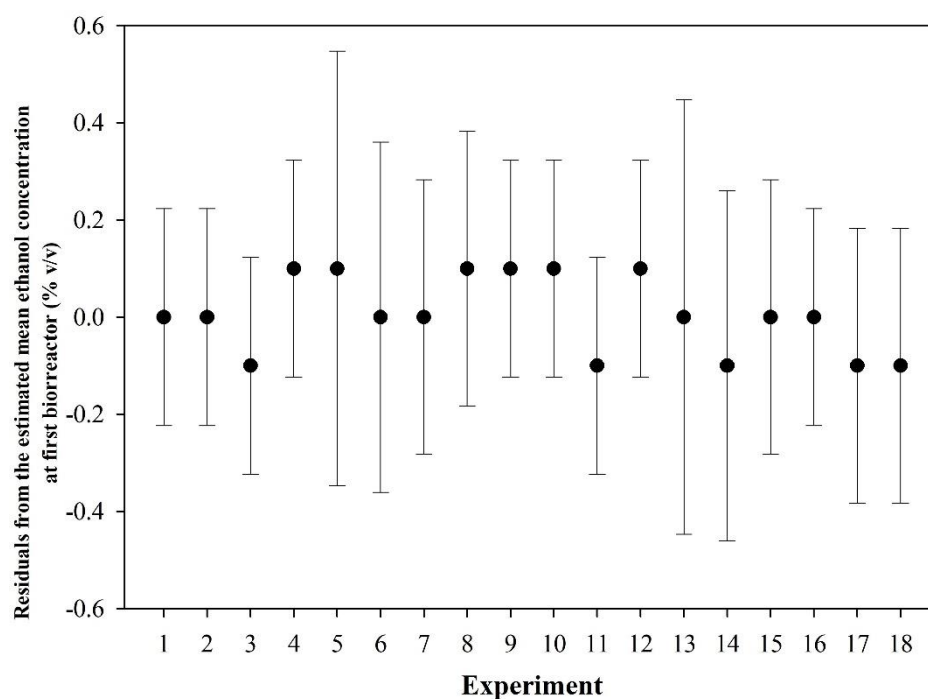

Figure S3.14. Residuals of the fitting of  $EtOH_{m1 est}$  for each experiment.

### S3.8. Mean ethanol concentration in the second bioreactor

The experimental results of the ANOVA on this variable are shown in Table S3.82.

Table S3.82. Results of the ANOVA on the mean ethanol concentration in the second bioreactor.

| Source of variability | Degrees of freedom | Variance | <i>F</i> | <i>P-value</i> |
|-----------------------|--------------------|----------|----------|----------------|
| Group                 | 17                 | 5.175    | 90.883   | <0.001         |

|        |     |        |
|--------|-----|--------|
| Sample | 144 | 0.0569 |
| Total  | 161 |        |

The  $F$  value at the 95% confidence level was greater than the corresponding critical point ( $F_{\text{crit}} = 1.623$ ), so there were statistically significant differences between experimental means ( $P\text{-value} < 0.001$ ).

The Forward Stepwise Regression method was applied.  $F$ -to-enter was set at 4 and  $F$ -to-remove at 3.9. Tables S3.83 to S3.88 show the results of each step. The terms added in each step are shown in successive rows in each table.

**Table S3.83.** Results of Step 0 in the fitting of the mean ethanol concentration in the second bioreactor.

| Terms added | Coefficient | Standard error |
|-------------|-------------|----------------|
| Constant    | 2.944       | 0.777          |

**Table S3.84.** Results of Step 1 in the fitting of the mean ethanol concentration in the second bioreactor.

| Terms added | $F$    | Coefficient | Standard error | $R$   | $R^2$ |
|-------------|--------|-------------|----------------|-------|-------|
| Constant    |        | 5.728       |                |       |       |
| $T_2V_{u1}$ | 23.855 | -0.0186     | 0.649          | 0.561 | 0.314 |

**Table S3.85.** Results of Step 2 in the fitting of the mean ethanol concentration in the second bioreactor.

| Terms added    | $F$    | Coefficient | Standard error | $R$   | $R^2$ |
|----------------|--------|-------------|----------------|-------|-------|
| Constant       |        | 4.788       |                |       |       |
| $T_2V_{u1}$    | 41.308 | -0.0188     |                |       |       |
| $E_{l2}E_{u1}$ | 36.878 | 0.0928      | 0.500          | 0.776 | 0.602 |

**Table S3.86.** Results of Step 3 in the fitting of the mean ethanol concentration in the second bioreactor.

| Terms added    | $F$    | Coefficient | Standard error | $R$   | $R^2$ |
|----------------|--------|-------------|----------------|-------|-------|
| Constant       |        | 4.44        |                |       |       |
| $T_2V_{u1}$    | 20.072 | -0.0135     |                |       |       |
| $E_{l2}E_{u1}$ | 52.497 | 0.143       |                |       |       |
| $E_{u1}V_{u1}$ | 12.67  | -0.0646     | 0.451          | 0.826 | 0.683 |

**Table S3.87.** Results of Step 4 in the fitting of the mean ethanol concentration in the second bioreactor.

| Terms added    | $F$    | Coefficient | Standard error | $R$   | $R^2$ |
|----------------|--------|-------------|----------------|-------|-------|
| Constant       |        | 4.638       |                |       |       |
| $T_2V_{u1}$    | 2.297  | -0.00619    |                |       |       |
| $E_{l2}E_{u1}$ | 28.734 | 0.253       |                |       |       |
| $E_{u1}V_{u1}$ | 16.654 | -0.139      |                |       |       |
| $T_2E_{l2}$    | 6.391  | -0.0127     | 0.428          | 0.848 | 0.719 |

$T_2V_{u1}$  must be removed in the next step.

**Table S3.88.** Results of Step 5 in the fitting of the mean ethanol concentration in the second bioreactor.

| Terms added    | $F$    | Coefficient | Standard error | $R$ | $R^2$ |
|----------------|--------|-------------|----------------|-----|-------|
| Constant       |        | 4.327       |                |     |       |
| $E_{l2}E_{u1}$ | 93.41  | 0.306       |                |     |       |
| $E_{u1}V_{u1}$ | 71.239 | -0.179      |                |     |       |
| $T_2E_{l2}$    | 25.665 | -0.0182     |                |     |       |

|       |       |       |
|-------|-------|-------|
| 0.434 | 0.840 | 0.706 |
|-------|-------|-------|

Beyond this point, no term had  $F > F_{\text{to-enter}}$  so the polynomial was not further expanded and the fitting process was finished. The final polynomial is that of eq. 12 of the manuscript.

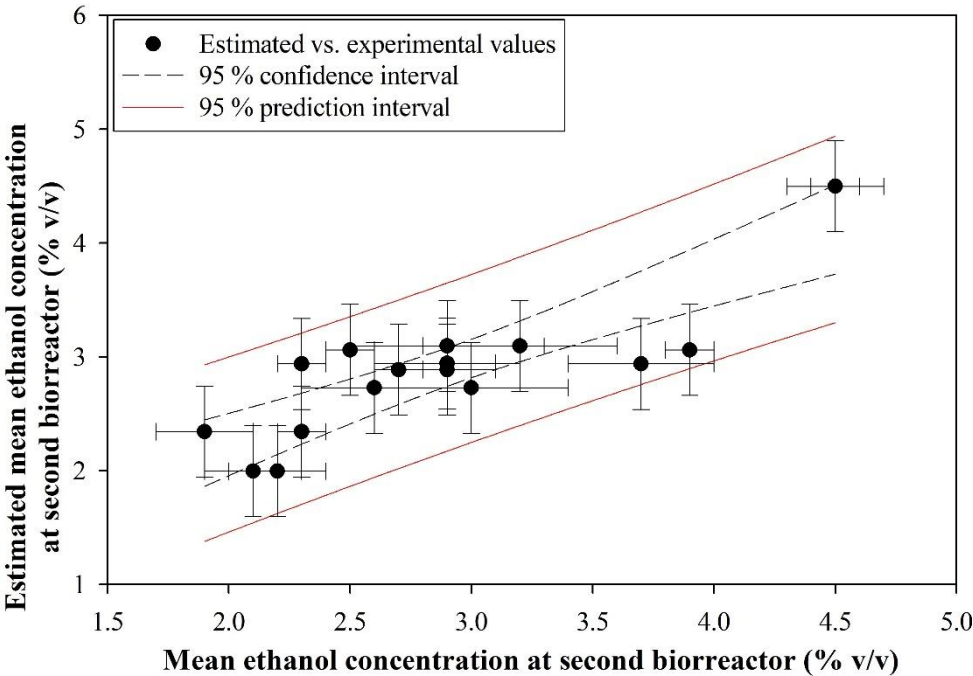

Figure S3.15. Plot of  $EtOH_{m2\ est}$  against  $EtOH_{m2}$  and curves for the 95% confidence and prediction intervals.

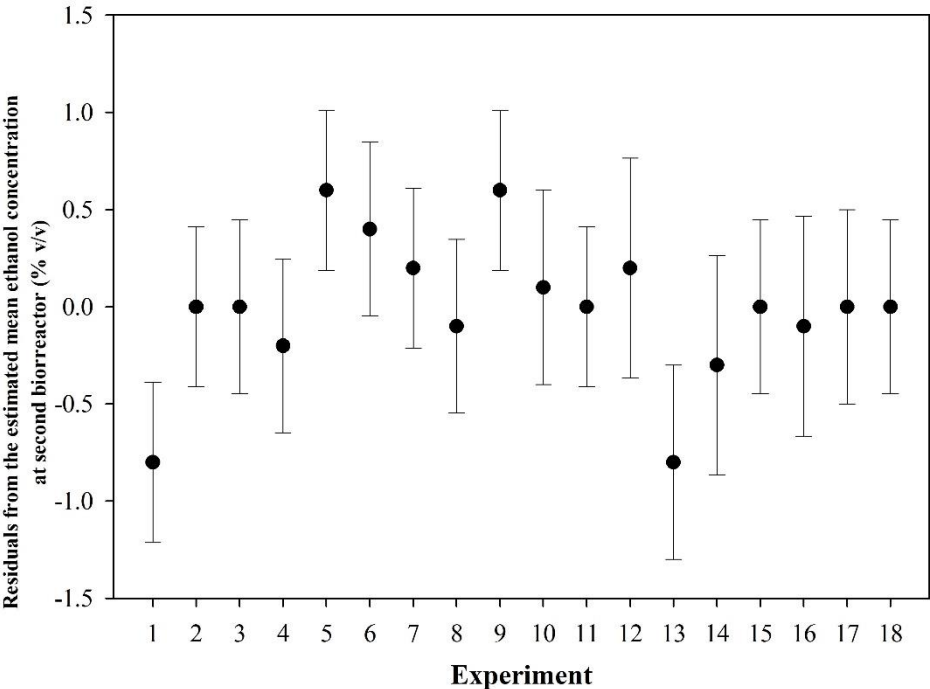

Figure S3.16. Residuals of the fitting of  $EtOH_{m2\ est}$  for each experiment.

S3.9. Mean acetic acid concentration in the first bioreactor

The experimental results of the ANOVA on this variable are shown in Table S3.89.

**Table S3.89.** Results of the ANOVA on the mean acetic acid concentration in the first bioreactor.

| Source of variability | Degrees of freedom | Variance | F      | P-value |
|-----------------------|--------------------|----------|--------|---------|
| Group                 | 17                 | 3.957    | 89.301 | <0.001  |
| Sample                | 144                | 0.0443   |        |         |
| Total                 | 161                |          |        |         |

The  $F$  value at the 95% confidence level was greater than the corresponding critical point ( $F_{crit} = 1.623$ ), so there were statistically significant differences between experimental means ( $P\text{-value} < 0.001$ ).

The Forward Stepwise Regression method was applied.  $F$ -to-enter was set at 4 and  $F$ -to-remove at 3.9. Tables S3.90 to S3.95 show the results of each step. The terms added in each step are shown in successive rows in each table.

**Table S3.90.** Results of Step 0 in the fitting of the mean acetic acid concentration in the first bioreactor.

| Terms added | Coefficient | Standard error |
|-------------|-------------|----------------|
| Constant    | 7.006       | 0.713          |

**Table S3.91.** Results of Step 1 in the fitting of the mean acetic acid concentration in the first bioreactor.

| Terms added | F       | Coefficient | Standard error | R     | R <sup>2</sup> |
|-------------|---------|-------------|----------------|-------|----------------|
| Constant    |         | 10.099      |                |       |                |
| $E_{l1}$    | 111.747 | -0.619      | 0.406          | 0.826 | 0.682          |

**Table S3.92.** Results of Step 2 in the fitting of the mean acetic acid concentration in the first bioreactor.

| Terms added    | F       | Coefficient | Standard error | R     | R <sup>2</sup> |
|----------------|---------|-------------|----------------|-------|----------------|
| Constant       |         | 10.099      |                |       |                |
| $E_{l1}$       | 111.404 | -0.415      |                |       |                |
| $E_{u1}E_{l1}$ | 103.843 | -0.0678     | 0.235          | 0.946 | 0.895          |

**Table S3.93.** Results of Step 3 in the fitting of the mean acetic acid concentration in the first bioreactor.

| Terms added    | F      | Coefficient | Standard error | R     | R <sup>2</sup> |
|----------------|--------|-------------|----------------|-------|----------------|
| Constant       |        | 9.128       |                |       |                |
| $E_{l1}$       | 0.689  | -0.0755     |                |       |                |
| $E_{u1}E_{l1}$ | 39.887 | -0.181      |                |       |                |
| $E_{u1}^2$     | 16.287 | 0.0982      | 0.206          | 0.960 | 0.921          |

$E_{l1}$  must be removed in the next step.

**Table S3.94.** Results of Step 4 in the fitting of the mean acetic acid concentration in the first bioreactor.

| Terms added    | F       | Coefficient | Standard error | R     | R <sup>2</sup> |
|----------------|---------|-------------|----------------|-------|----------------|
| Constant       |         | 8.903       |                |       |                |
| $E_{u1}E_{l1}$ | 474.589 | -0.204      |                |       |                |
| $E_{u1}^2$     | 161.378 | 0.117       | 0.206          | 0.959 | 0.920          |

**Table S3.95.** Results of Step 5 in the fitting of the mean acetic acid concentration in the first bioreactor.

| Terms added    | F       | Coefficient | Standard error | R | R <sup>2</sup> |
|----------------|---------|-------------|----------------|---|----------------|
| Constant       |         | 9.188       |                |   |                |
| $E_{u1}E_{l1}$ | 174.929 | -0.175      |                |   |                |

|                |        |         |       |       |       |
|----------------|--------|---------|-------|-------|-------|
| $E_{u1}^2$     | 61.047 | 0.0932  |       |       |       |
| $E_{t1}V_{u1}$ | 8.218  | -0.0191 |       |       |       |
|                |        |         | 0.192 | 0.965 | 0.931 |

Beyond this point, no term had  $F > F_{to-enter}$  so the polynomial was not further expanded and the fitting process was finished. The final polynomial is that of eq. 13 of the manuscript.

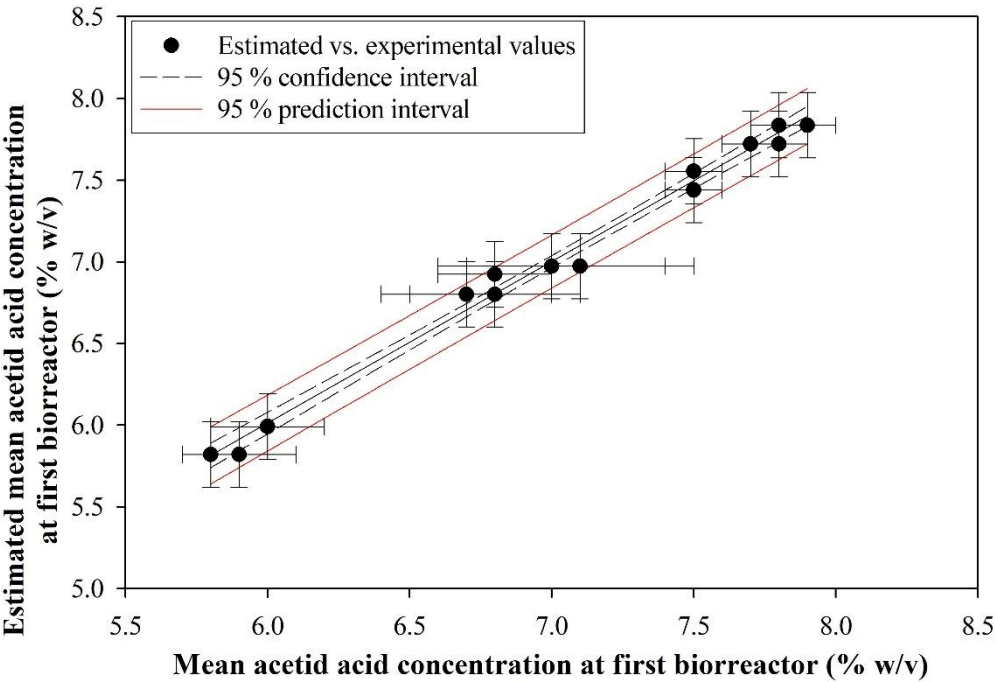

Figure S3.17. Plot of  $HAC_{m1 est}$  against  $HAC_{m1}$  and curves for the 95% confidence and prediction intervals.

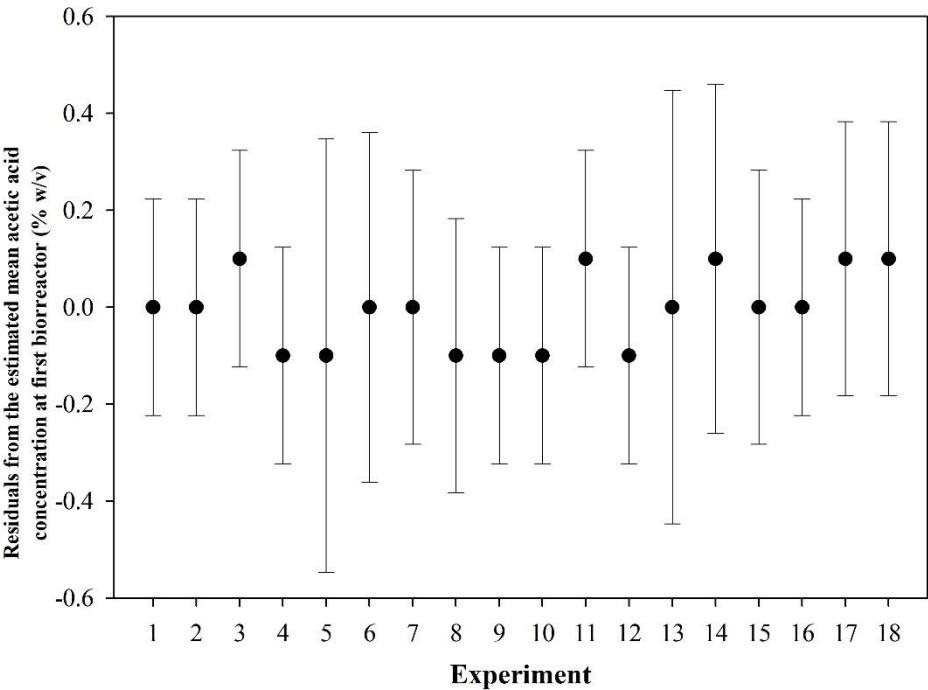

Figure S3.18. Residuals of the fitting of  $HAC_{m1 est}$  for each experiment.

S3.10. Mean acetic acid concentration in the second bioreactor

The experimental results of the ANOVA on this variable are shown in Table S3.96.

**Table S3.96.** Results of the ANOVA on the mean acetic acid concentration in the second bioreactor.

| Source of variability | Degrees of freedom | Variance | <i>F</i> | <i>P-value</i> |
|-----------------------|--------------------|----------|----------|----------------|
| Group                 | 17                 | 5.198    | 91.279   | <0.001         |
| Sample                | 144                | 0.0569   |          |                |
| Total                 | 161                |          |          |                |

The *F* value at the 95% confidence level was greater than the corresponding critical point ( $F_{crit} = 1.623$ ), so there were statistically significant differences between experimental means ( $P\text{-value} < 0.001$ ).

The Forward Stepwise Regression method was applied. *F*-to-enter was set at 4 and *F*-to-remove at 3.9. Tables S3.97 to S3.102 show the results of each step. The terms added in each step are shown in successive rows in each table.

**Table S3.97.** Results of Step 0 in the fitting of the mean acetic acid concentration in the second bioreactor.

| Terms added | Coefficient | Standard error |
|-------------|-------------|----------------|
| Constant    | 8.55        | 0.779          |

**Table S3.98.** Results of Step 1 in the fitting of the mean acetic acid concentration in the second bioreactor.

| Terms added | <i>F</i> | Coefficient | Standard error | <i>R</i> | <i>R</i> <sup>2</sup> |
|-------------|----------|-------------|----------------|----------|-----------------------|
| Constant    |          | 5.818       |                |          |                       |
| $T_2V_{u1}$ | 22.397   | 0.0182      | 0.658          | 0.549    | 0.301                 |

**Table S3.99.** Results of Step 2 in the fitting of the mean acetic acid concentration in the second bioreactor.

| Terms added    | <i>F</i> | Coefficient | Standard error | <i>R</i> | <i>R</i> <sup>2</sup> |
|----------------|----------|-------------|----------------|----------|-----------------------|
| Constant       |          | 6.78        |                |          |                       |
| $T_2V_{u1}$    | 39.379   | 0.0184      |                |          |                       |
| $E_{l2}E_{u1}$ | 38.136   | -0.0949     | 0.502          | 0.775    | 0.600                 |

**Table S3.100.** Results of Step 3 in the fitting of the mean acetic acid concentration in the second bioreactor.

| Terms added    | <i>F</i> | Coefficient | Standard error | <i>R</i> | <i>R</i> <sup>2</sup> |
|----------------|----------|-------------|----------------|----------|-----------------------|
| Constant       |          | 7.13        |                |          |                       |
| $T_2V_{u1}$    | 18.781   | 0.0132      |                |          |                       |
| $E_{l2}E_{u1}$ | 53.604   | -0.146      |                |          |                       |
| $E_{u1}V_{u1}$ | 12.646   | 0.0649      | 0.453          | 0.825    | 0.681                 |

**Table S3.101.** Results of Step 4 in the fitting of the mean acetic acid concentration in the second bioreactor.

| Terms added    | <i>F</i> | Coefficient | Standard error | <i>R</i> | <i>R</i> <sup>2</sup> |
|----------------|----------|-------------|----------------|----------|-----------------------|
| Constant       |          | 6.933       |                |          |                       |
| $T_2V_{u1}$    | 2.029    | 0.00586     |                |          |                       |
| $E_{l2}E_{u1}$ | 28.733   | -0.254      |                |          |                       |

|                |        |        |       |       |       |
|----------------|--------|--------|-------|-------|-------|
| $E_{u1}V_{u1}$ | 16.406 | 0.138  |       |       |       |
| $T_2E_{l2}$    | 6.239  | 0.0127 |       |       |       |
|                |        |        | 0.431 | 0.847 | 0.717 |

$T_2V_{u1}$  must be removed in the next step.

**Table S3.102.** Results of Step 5 in the fitting of the mean acetic acid concentration in the second bioreactor.

| Terms added    | <i>F</i> | Coefficient | Standard error | <i>R</i> | <i>R</i> <sup>2</sup> |
|----------------|----------|-------------|----------------|----------|-----------------------|
| Constant       |          | 7.227       |                |          |                       |
| $E_{l2}E_{u1}$ | 91.936   | -0.305      |                |          |                       |
| $E_{u1}V_{u1}$ | 68.862   | 0.177       |                |          |                       |
| $T_2E_{l2}$    | 24.457   | 0.0178      |                |          |                       |
|                |          |             | 0.436          | 0.840    | 0.706                 |

Beyond this point, no term had  $F > F$ -to-enter so the polynomial was not further expanded and the fitting process was finished. The final polynomial is that of eq. 14 of the manuscript.

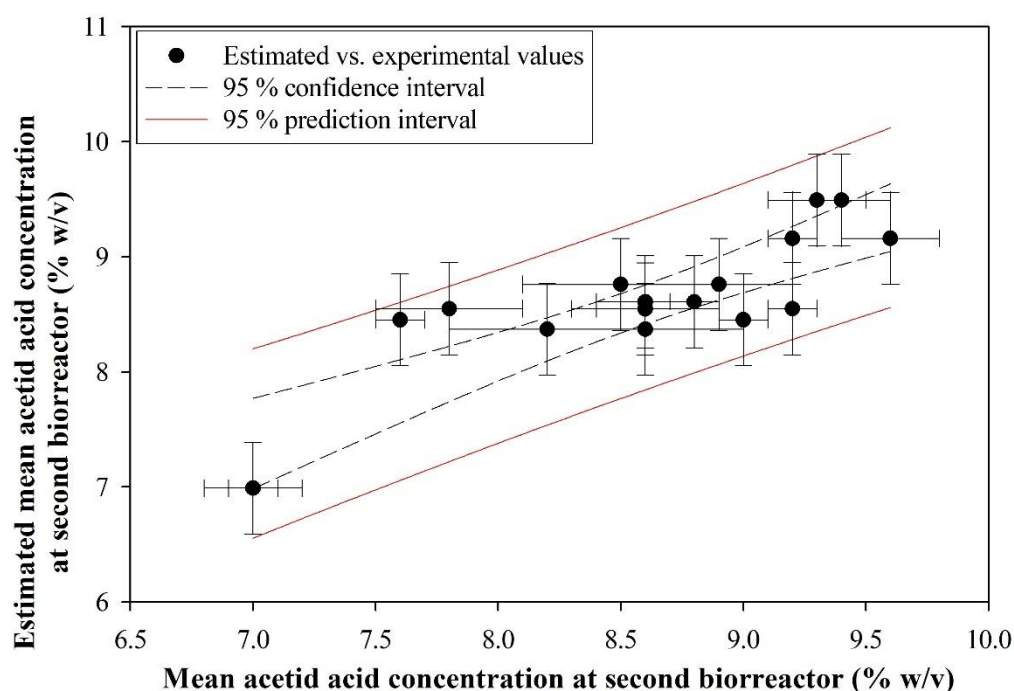

**Figure S3.19.** Plot of  $HAC_{m2\ est}$  against  $HAC_{m2}$  and curves for the 95% confidence and prediction intervals.

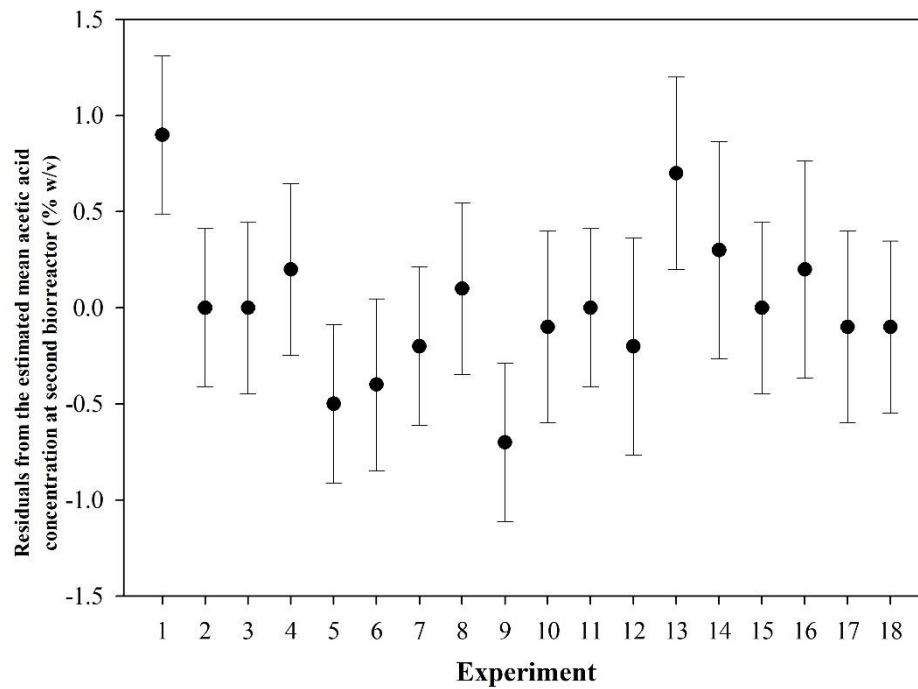

Figure S3.20. Residuals of the fitting of  $HAC_{m2 est}$  for each experiment.

## Abbreviations

- $E_{l1}$ : ethanol concentration while the first reactor was loaded (% v/v).  
 $E_{l2}$ : ethanol concentration while the second reactor was loaded (% v/v).  
 $EtOH_{m1}$ : mean ethanol concentration in the first reactor during a cycle (% v/v).  
 $EtOH_{m1 est}$ : estimated mean ethanol concentration in the first reactor during a cycle (% v/v).  
 $EtOH_{m2}$ : mean ethanol concentration in the second reactor during a cycle (% v/v).  
 $EtOH_{m2 est}$ : estimated mean ethanol concentration in the second reactor during a cycle (% v/v).  
 $E_{u1}$ : ethanol concentration at the time the first reactor was unloaded (% v/v).  
 $E_{u2}$ : ethanol concentration at the time the second reactor was unloaded (% v/v).  
 $E_{u2 est}$ : estimated ethanol concentration at the time the second reactor was unloaded (% v/v).  
 $HAc_{m1}$ : mean acetic acid concentration in the first reactor during a cycle (% w/v).  
 $HAc_{m1 est}$ : estimated mean acetic acid concentration in the first reactor during a cycle (% w/v).  
 $HAc_{m2}$ : mean acetic acid concentration in the second reactor during a cycle (% w/v).  
 $HAc_{m2 est}$ : estimated mean acetic acid concentration in the second reactor during a cycle (% w/v).  
 $P_m$ : total production of acetic acid in the two-reactor system (g acetic acid·h<sup>-1</sup>).  
 $P_{m est}$ : estimated total production of acetic acid in the two-reactor system (g acetic acid·h<sup>-1</sup>).  
 $(r_A)_{global}$ : mean overall rate of acetic acid formation in the two bioreactors (% w/v · h<sup>-1</sup>).  
 $(r_A)_{global est}$ : estimated mean overall rate of acetic acid formation in the two bioreactors (% w/v · h<sup>-1</sup>).  
 $T_1$ : temperature in the first reactor (°C).  
 $T_2$ : temperature in the second reactor (°C).  
 $t_{cycle}$ : total cycle duration (h).  
 $t_{cycle est}$ : estimated total cycle duration (h).  
 $V_m$ : mean overall volume in the two reactors during a cycle (L).  
 $V_{m est}$ : estimated mean overall volume in the two reactors during a cycle (L).  
 $V_{u1}$ : volume unloaded from the first reactor (L).  
 $V_{u2}$ : volume unloaded from the second reactor (L).  
 $V_{u2 est}$ : estimated volume unloaded from the second reactor (L).

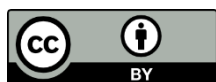

© 2020 by the authors. Submitted for possible open access publication under the terms and conditions of the Creative Commons Attribution (CC BY) license (<http://creativecommons.org/licenses/by/4.0/>).
